# Supplementary material for: Visible-light-induced cascade chromone cyclization/chalcogenation to access 3-chalcogenyl-chromones using elemental sulfur/selenium
Source: Royal Society of Chemistry journal article supplement (doi:10.1039/d4cc04609a), 2024-01-01

## Visible-light-induced cascade chromone cyclization/chalcogenation to access 3-chalcogenyl-chromones using elemental sulfur/selenium

Tao Guo,<sup>a</sup> Chuanhu Gao,<sup>a</sup> Zhonghui Li,<sup>a</sup> Penghua Hu,<sup>a</sup> Huan Chen,<sup>b</sup>  
Shulei Han,<sup>\*b</sup> Yunhui Zhao,<sup>\*c</sup> and Congjun Zhu<sup>\*a</sup>

<sup>a</sup> *School of Chemistry and Chemical Engineering, Henan University of Technology,  
Zhengzhou, Henan 450001, PR China.*

<sup>b</sup> *China National Tobacco Quality Supervision and Test Center, Key Laboratory of Tobacco  
Biological Effects, Zhengzhou, 450001, China*

<sup>c</sup> *School of Chemistry and Chemical Engineering, Hunan University of Science and  
Technology, Xiangtan 411201, PR China*

### Supplementary Information

#### Table of Content

|                                                                                              |    |
|----------------------------------------------------------------------------------------------|----|
| 1 General experimental .....                                                                 | 2  |
| 2 The reaction equipment of visible light catalysis .....                                    | 2  |
| 3 Optimization of the reaction conditions .....                                              | 2  |
| 4 General procedure for the synthesis of 3-chalcogenyl-chromones <b>3</b> and <b>5</b> ..... | 4  |
| 5 Copies of <sup>1</sup> H and <sup>13</sup> C NMR Spectra .....                             | 20 |

## 1 General experimental

Unless otherwise mentioned, all materials were commercially obtained and used without further purification. Enaminones (**1**)<sup>1</sup> were synthesized according to previously described methods. The <sup>1</sup>H NMR, <sup>13</sup>C NMR, and <sup>19</sup>F NMR spectra were recorded at 500 MHz, 126 MHz, 471 MHz, respectively, on a Bruker AM500 MHz with chemical shift values in ppm relative to TMS ( $\delta$ H 0.00 and  $\delta$ C 0.0) as internal standard. The coupling constants *J*, are reported in Hertz (Hz). All melting points were determined on a SGW X-4A melting point instrument without correction. High-resolution mass spectra (HRMS) were recorded on Q-Exactive plus Orbitrap (ESI) or HP-5989A instrument.. Infrared spectra (IR) were recorded on Spectrum TWO. Reactions were monitored by thin layer chromatography (TLC), on glass plates coated with silica gel with Fluorescent indicator (Huanghai, HSGF254) and visualized with UV light at 254 nm. Flash chromatography was performed on silica gel (Huanghai, 300-400) using petroleum ether (PE)-ethyl acetate (EA) as eluent.

## 2 The reaction equipment of visible light catalysis

We use RLH-18 8-position Photo Reaction System, which manufactured by Beijing Rogertech Co.ltd base in Beijing PRC. This Photo reactor we used have equipped 8 blue light 10W LED. This blue light 10 WLED's energy peak wavelength is 454.9 nm, peak width at half-height is 22.9 nm, irradiance@10 W is 172 mW/cm<sup>2</sup>. Irradiation vessel is borosilicate glass test tube, LED irradiate through a high-reflection channel to the test tube, path length is 2 cm. No filter between LED and test tube.

## 3 Optimization of the reaction conditions

Table S1. Optimization of the sulfenylation conditions<sup>a</sup>

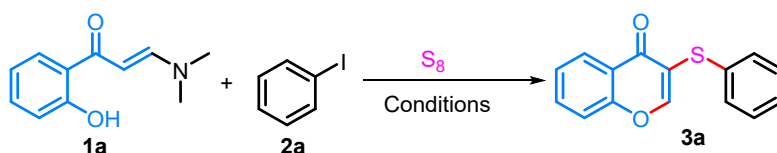

| Entry | Catalyst (10 mol%) | Oxidant (2 equiv.) | Base (equiv.)                       | Solvent (mL) | Yield <sup>b</sup> (%) |
|-------|--------------------|--------------------|-------------------------------------|--------------|------------------------|
| 1     | CuI                | KIO <sub>3</sub>   | Cs <sub>2</sub> CO <sub>3</sub> (3) | DMF (1)      | 40                     |
| 2     | CuI                | KIO <sub>3</sub>   | <sup>t</sup> BuOK (3)               | DMF (1)      | 61                     |
| 3     | CuI                | KIO <sub>3</sub>   | K <sub>2</sub> CO <sub>3</sub> (3)  | DMF (1)      | 48                     |
| 4     | CuI                | KIO <sub>3</sub>   | KOH (3)                             | DMF (1)      | 65                     |
| 5     | CuI                | KIO <sub>3</sub>   | KOH (2)                             | DMF (1)      | 56                     |
| 6     | CuI                | KIO <sub>3</sub>   | KOH (3)                             | DMSO (1)     | 61                     |
| 7     | CuI                | KIO <sub>3</sub>   | KOH (3)                             | DCM (1)      | 0                      |
| 8     | CuI                | KIO <sub>3</sub>   | KOH (3)                             | NMP (1)      | 74                     |

|                 |                      |                   |         |                        |       |
|-----------------|----------------------|-------------------|---------|------------------------|-------|
| 9               | CuI                  | KIO <sub>3</sub>  | KOH (3) | CH <sub>3</sub> CN (1) | 65    |
| 10              | CuI                  | KIO <sub>3</sub>  | KOH (3) | H <sub>2</sub> O (1)   | 0     |
| 11              | --                   | KIO <sub>3</sub>  | KOH (3) | NMP (1)                | 0     |
| 12              | CuI                  | --                | KOH (3) | NMP (1)                | Trace |
| 13              | Cu(OAc) <sub>2</sub> | KIO <sub>3</sub>  | KOH (3) | NMP (1)                | 52    |
| 14              | CuBr <sub>2</sub>    | KIO <sub>3</sub>  | KOH (3) | NMP (1)                | 64    |
| 15              | Cu <sub>2</sub> S    | KIO <sub>3</sub>  | KOH (3) | NMP (1)                | 83    |
| 16              | CuBr                 | KIO <sub>3</sub>  | KOH (3) | NMP (1)                | 53    |
| 17              | CuCl                 | KIO <sub>3</sub>  | KOH (3) | NMP (1)                | 47    |
| 18              | FeCl <sub>3</sub>    | KIO <sub>3</sub>  | KOH (3) | NMP (1)                | 0     |
| 19              | CoCl <sub>2</sub>    | KIO <sub>3</sub>  | KOH (3) | NMP (1)                | 0     |
| 20              | Cu <sub>2</sub> S    | KMnO <sub>4</sub> | KOH (3) | NMP (1)                | 59    |
| 21              | Cu <sub>2</sub> S    | TBHP              | KOH (3) | NMP (1)                | 51    |
| 22              | Cu <sub>2</sub> S    | KIO <sub>3</sub>  | KOH (3) | NMP (2)                | 76    |
| 23              | Cu <sub>2</sub> S    | KIO <sub>3</sub>  | KOH (3) | NMP (0.5)              | 62    |
| 24 <sup>c</sup> | Cu <sub>2</sub> S    | KIO <sub>3</sub>  | KOH (3) | NMP (1)                | Trace |
| 25 <sup>d</sup> | Cu <sub>2</sub> S    | KIO <sub>3</sub>  | KOH (3) | NMP (1)                | 43    |
| 26 <sup>e</sup> | Cu <sub>2</sub> S    | KIO <sub>3</sub>  | KOH (3) | NMP (1)                | 68    |

<sup>a</sup> Reaction conditions: **1a** (0.2 mmol), S<sub>8</sub> (0.6 mmol), **2a** (0.6 mmol), catalyst (0.1 equiv.), oxidant (2 equiv.), base, solvent (1 mL), N<sub>2</sub> atmosphere, Blue LEDs (10 W, λ<sub>max</sub> = 455 nm), 24 h. <sup>b</sup> Isolated yield. <sup>c</sup> Under air. <sup>d</sup> Under O<sub>2</sub>. <sup>e</sup> KIO<sub>3</sub> (1.2 equiv.) was used.

**Table S2.** Optimization of the selenation conditions<sup>a</sup>

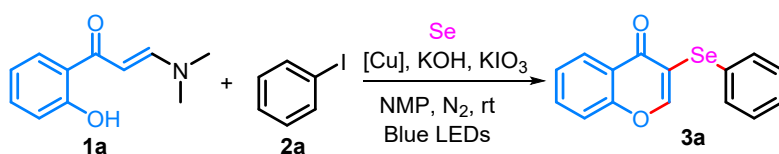

| Entry | Catalyst (10 mol%)   | Yield <sup>b</sup> (%) |
|-------|----------------------|------------------------|
| 1     | Cu(OAc) <sub>2</sub> | trace                  |
| 2     | CuBr <sub>2</sub>    | 32                     |
| 3     | Cu <sub>2</sub> S    | 70                     |
| 4     | CuI                  | 75                     |
| 5     | CuBr                 | 45                     |
| 6     | CuCl                 | 29                     |

<sup>a</sup> Reaction conditions: **1a** (0.2 mmol), Se (0.6 mmol), **2a** (0.6 mmol), catalyst (0.1 equiv.), KIO<sub>3</sub> (2 equiv.), KOH (3 equiv.), NMP (1 mL), N<sub>2</sub> atmosphere, Blue LEDs (10 W, λ<sub>max</sub> = 455 nm), 24 h. <sup>b</sup> Isolated yield.

## 4 General procedure for the synthesis of 3-chalcogenyl-chromones 3 and 5

Under nitrogen, 1 mL NMP, **1** (0.2 mmol), **2** or **4** (0.6 mmol), S<sub>8</sub> (0.6 mmol, 19.2 mg)/Cu<sub>2</sub>S (0.02 mmol, 3.2 mg) or Se (0.6 mmol, 47.3 mg)/CuI (0.02 mmol, 3.8 mg), KOH (0.6 mmol, 33.7 mg), and KIO<sub>3</sub> (0.4 mmol, 85.6 mg) were added into the dry thick-walled glass pressure tube. The mixture was stirred at room temperature under 10W blue LEDs. After the reaction was complete, the mixture was diluted with 20 mL ethyl acetate and washed with 10 mL H<sub>2</sub>O. The aqueous layer was extracted twice with ethyl acetate (5 mL) and the combined organic phase was dried over Na<sub>2</sub>SO<sub>4</sub>. After evaporation of the solvents the residue was purified by flash column chromatography (silica gel, PE–EA) to afford the desired products **3** and **5**.

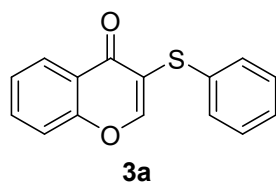

3-(phenylthio)-4H-chromen-4-one<sup>2</sup>

Purified by flash chromatograph column (PE : EtOAc = 15 : 1).

Yellow solid (42.0 mg, 83% yield); mp 103-104 °C.

<sup>1</sup>H NMR (500 MHz, CDCl<sub>3</sub>) δ 8.24 (dd, *J* = 8.0, 1.5 Hz, 1H), 8.14 (s, 1H), 7.70 – 7.67 (m, 1H), 7.47 – 7.39 (m, 4H), 7.28 (t, *J* = 7.5 Hz, 2H), 7.21 (t, *J* = 7.5 Hz, 1H).

<sup>13</sup>C NMR (126 MHz, CDCl<sub>3</sub>) δ 175.2, 157.5, 156.4, 134.1, 129.9, 129.3, 127.2, 126.5, 125.8, 123.7, 120.0, 118.3.

IR (KBr) 2922, 1643, 1609, 1458, 1305, 1083, 763, 732, 686 cm<sup>-1</sup>.

HRMS for C<sub>15</sub>H<sub>11</sub>O<sub>2</sub>S<sup>+</sup>(M<sup>++</sup>H): calcd. 255.04743, found 255.04776.

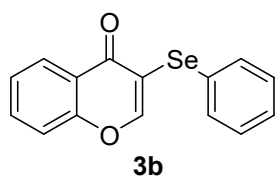

3-(phenylselanyl)-4H-chromen-4-one<sup>3</sup>

Purified by flash chromatograph column (PE : EtOAc = 10 : 1).

Yellow solid (45.3 mg, 75% yield); mp 69-70 °C.

<sup>1</sup>H NMR (500 MHz, CDCl<sub>3</sub>) δ 8.22 (d, *J* = 8.0 Hz, 1H), 7.88 (s, 1H), 7.67 – 7.63 (m, 1H), 7.60 – 7.58 (m, 2H), 7.42 – 7.38 (m, 2H), 7.30 – 7.27 (m, 3H).

<sup>13</sup>C NMR (126 MHz, CDCl<sub>3</sub>) δ 175.2, 156.4, 155.8, 133.9, 133.9, 129.6, 128.2, 126.3, 125.6, 123.2, 118.1, 117.9.

IR (KBr) 2921, 1609, 1461, 1308, 1067, 876, 755, 688 cm<sup>-1</sup>.

HRMS for  $C_{15}H_{11}O_2Se^+(M^+H)$ : calcd. 302.99188, found 302.99176.

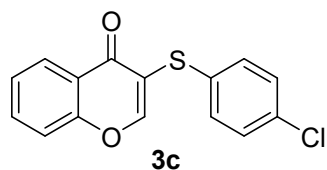

3-((4-chlorophenyl)thio)-4H-chromen-4-one<sup>2</sup>

Purified by flash chromatograph column (PE : EtOAc = 15 : 1).

Yellow solid (48.7 mg, 85% yield), mp 164-166 °C.

<sup>1</sup>H NMR (500 MHz, CDCl<sub>3</sub>) δ 8.24 – 8.22 (m, 2H), 7.72 – 7.69 (m, 1H), 7.48 (d, *J* = 8.0 Hz, 1H), 7.44 (d, *J* = 7.5 Hz, 1H), 7.32 (d, *J* = 8.5 Hz, 2H), 7.26 – 7.23 (m, 2H).

<sup>13</sup>C NMR (126 MHz, CDCl<sub>3</sub>) δ 175.1, 158.0, 156.5, 134.3, 133.2, 132.9, 131.0, 129.4, 126.6, 126.0, 123.8, 119.3, 118.3.

IR (KBr) 3050, 1636, 1464, 1311, 1087, 756 cm<sup>-1</sup>.

HRMS for  $C_{15}H_{10}ClO_2S^+(M^+H)$ : calcd. 289.00845, found 289.00894.

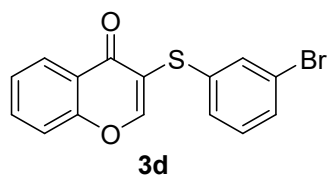

3-((3-bromophenyl)thio)-4H-chromen-4-one

Purified by flash chromatograph column (PE : EtOAc = 15 : 1).

Yellow solid (52.9 mg, 80% yield); mp 118-120 °C.

<sup>1</sup>H NMR (500 MHz, CDCl<sub>3</sub>) δ 8.27 (s, 1H), 8.23 (dd, *J* = 8.0, 1.5 Hz, 1H), 7.73 – 7.69 (m, 1H), 7.50 – 7.48 (m, 1H), 7.46 – 7.42 (m, 2H), 7.31 – 7.27 (m, 2H), 7.11 (dd, *J* = 8.0, 1.5 Hz, 1H).

<sup>13</sup>C NMR (126 MHz, CDCl<sub>3</sub>) δ 174.9, 158.7, 156.4, 136.9, 134.3, 131.3, 130.4, 129.9, 127.5, 126.5, 126.0, 123.8, 123.0, 118.4, 118.3.

IR (KBr) 2922, 1655, 1607, 1558, 1456, 1305, 1080, 764 cm<sup>-1</sup>.

HRMS for  $C_{15}H_{10}BrO_2S^+(M^+H)$ : calcd. 332.95794, found 332.95856.

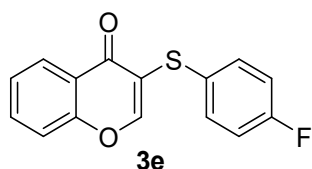

3-((4-fluorophenyl)thio)-4H-chromen-4-one<sup>6</sup>

Purified by flash chromatograph column (PE : EtOAc = 15 : 1).

Yellow solid (46.1 mg, 85% yield); mp 134-135 °C.

**<sup>1</sup>H NMR (500 MHz, CDCl<sub>3</sub>)** δ 8.23 (dd, *J* = 8.0, 1.5 Hz, 1H), 8.14 (s, 1H), 7.70 – 7.67 (m, 1H), 7.47 – 7.41 (m, 4H), 7.01 – 6.97 (m, 2H).

**<sup>13</sup>C NMR (126 MHz, CDCl<sub>3</sub>)** δ 175.2, 162.4 (d, <sup>1</sup>*J*<sub>C-F</sub> = 246.3 Hz), 157.1, 156.4, 134.2, 132.9 (d, <sup>3</sup>*J*<sub>C-F</sub> = 8.3 Hz), 128.9 (d, <sup>4</sup>*J*<sub>C-F</sub> = 3.3 Hz), 126.5, 125.9, 123.7, 120.6, 118.3, 116.4 (d, <sup>2</sup>*J*<sub>C-F</sub> = 22.5 Hz).

**<sup>19</sup>F NMR (471 MHz, CDCl<sub>3</sub>)** δ -114.0.

**IR (KBr)** 2906, 1635, 1489, 1216, 1085, 756, 625 cm<sup>-1</sup>.

**HRMS for C<sub>15</sub>H<sub>10</sub>FO<sub>2</sub>S<sup>+</sup>(M<sup>+</sup>+H):** calcd.273.03801, found 273.03760.

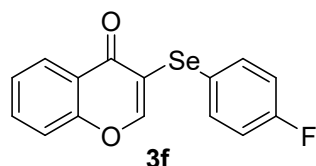

3-((4-fluorophenyl)selanyl)-4H-chromen-4-one<sup>5</sup>

Purified by flash chromatograph column (PE : EtOAc = 10 : 1).

colorless oil (40.4 mg, 63% yield).

**<sup>1</sup>H NMR (500 MHz, CDCl<sub>3</sub>)** δ 8.23 (dd, *J* = 8.0, 1.0 Hz, 1H), 7.90 (s, 1H), 7.69 – 7.61 (m, 3H), 7.42 (t, *J* = 8.5 Hz, 2H), 7.02 – 6.99 (m, 2H).

**<sup>13</sup>C NMR (126 MHz, CDCl<sub>3</sub>)** δ 175.3, 163.1 (d, <sup>1</sup>*J*<sub>C-F</sub> = 246.4 Hz), 156.5, 155.7, 136.5 (d, <sup>3</sup>*J*<sub>C-F</sub> = 7.9 Hz), 134.0, 126.4, 125.7, 123.2, 122.6 (d, <sup>4</sup>*J*<sub>C-F</sub> = 3.4 Hz), 118.2, 118.1, 116.8 (d, <sup>2</sup>*J*<sub>C-F</sub> = 21.4 Hz).

**IR (KBr)** 2972, 1631, 1462, 1214, 1047, 755 cm<sup>-1</sup>.

**HRMS for C<sub>15</sub>H<sub>10</sub>FO<sub>2</sub>Se<sup>+</sup>(M<sup>+</sup>+H):** calcd. 320.98246, found 320.98242.

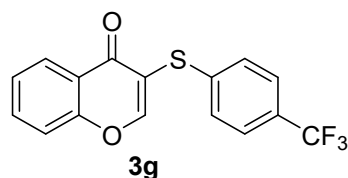

3-((4-(trifluoromethyl)phenyl)thio)-4H-chromen-4-one

Purified by flash chromatograph column (PE : EtOAc = 15 : 1).

Yellow solid (40.5 mg, 63% yield); mp 165-166 °C.

**<sup>1</sup>H NMR (500 MHz, CDCl<sub>3</sub>)** δ 8.29 (s, 1H), 8.18 (dd, *J* = 8.0, 1.5 Hz, 1H), 7.68 – 7.65 (m, 1H), 7.46 – 7.38 (m, 4H), 7.30 (d, *J* = 8.0 Hz, 2H).

**<sup>13</sup>C NMR (126 MHz, CDCl<sub>3</sub>)** δ 174.9, 159.5, 156.5, 140.2, 134.5, 128.4 (q, *J* = 32.9 Hz), 127.7, 126.6, 126.2, 125.9 (q, *J* = 3.5 Hz), 124.1 (q, *J* = 272.7 Hz), 123.9, 118.4, 117.4.

**<sup>19</sup>F NMR (471 MHz, CDCl<sub>3</sub>)** δ -62.5.

**IR (KBr)** 2920, 1643, 1463, 1324, 1105, 822, 753 cm<sup>-1</sup>.

**HRMS for C<sub>16</sub>H<sub>10</sub>F<sub>3</sub>O<sub>2</sub>S<sup>+</sup>(M<sup>+</sup>+H):** calcd. 323.03481, found 323.03473.

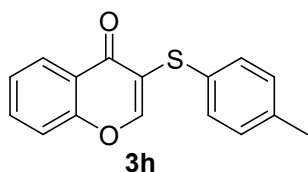

3-(p-tolylthio)-4H-chromen-4-one<sup>2</sup>

Purified by flash chromatograph column (PE : EtOAc = 15 : 1).

Yellow solid (47.9 mg, 89% yield); mp 106-108 °C.

<sup>1</sup>H NMR (500 MHz, CDCl<sub>3</sub>) δ 8.23 (d, *J* = 8.0 Hz, 1H), 8.03 (s, 1H), 7.68- 7.65 (m, 1H), 7.45 – 7.39 (m, 2H), 7.34 (d, *J* = 8.5 Hz, 2H), 7.10 (d, *J* = 8.0 Hz, 2H), 2.30 (s, 3H).

<sup>13</sup>C NMR (126 MHz, CDCl<sub>3</sub>) δ 175.2, 156.4, 137.7, 134.0, 131.1, 130.1, 129.9, 126.4, 125.7, 123.6, 121.2, 118.2, 21.2.

IR (KBr) 2921, 1644, 1555, 1462, 1305, 1080, 755 cm<sup>-1</sup>.

HRMS for C<sub>16</sub>H<sub>13</sub>O<sub>2</sub>S<sup>+</sup>(M<sup>+</sup>+H): calcd. 269.06308, found 269.06351.

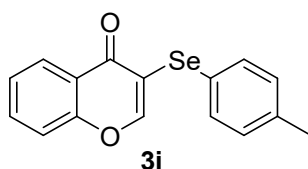

3-(p-tolylselanyl)-4H-chromen-4-one<sup>4</sup>

Purified by flash chromatograph column (PE : EtOAc = 5 : 1).

Yellow solid (46.6 mg, 74% yield); mp 90-92 °C.

<sup>1</sup>H NMR (500 MHz, CDCl<sub>3</sub>) δ 8.22 (dd, *J* = 8.5, 1.5 Hz, 1H), 7.77 (s, 1H), 7.64 (td, *J* = 8.0, 1.5 Hz, 1H), 7.52 (d, *J* = 8.0 Hz, 2H), 7.41 – 7.38 (m, 2H), 7.12 (d, *J* = 8.0 Hz, 2H), 2.33 (s, 3H).

<sup>13</sup>C NMR (126 MHz, CDCl<sub>3</sub>) δ 175.4, 156.5, 155.0, 138.6, 134.8, 133.9, 130.6, 126.4, 125.6, 124.0, 123.2, 118.7, 118.1, 21.3.

IR (KBr) 2921, 2852, 1655, 1455, 1303, 1080, 765, 685 cm<sup>-1</sup>.

HRMS for C<sub>16</sub>H<sub>13</sub>O<sub>2</sub>Se<sup>+</sup>(M<sup>+</sup>+H): calcd. 317.00753, found 317.00748.

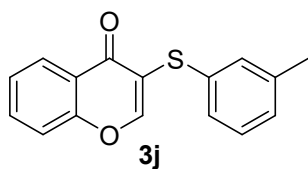

3-(m-tolylthio)-4H-chromen-4-one<sup>7</sup>

Purified by flash chromatograph column (PE : EtOAc = 5 : 1).

Yellow solid (38.6 mg, 72% yield); mp 109-111 °C.

<sup>1</sup>H NMR (500 MHz, CDCl<sub>3</sub>) δ 8.23 (dd, *J* = 8.0, 1.0 Hz, 1H), 8.11 (s, 1H), 7.69 – 7.66 (m, 1H), 7.46 – 7.40 (m, 2H), 7.22 – 7.14 (m, 3H), 7.02 (d, *J* = 7.0 Hz, 1H), 2.29 (s, 3H).

$^{13}\text{C}$  NMR (126 MHz,  $\text{CDCl}_3$ )  $\delta$  175.2, 157.2, 156.4, 139.2, 134.0, 133.7, 130.7, 129.1, 128.2, 127.2, 126.5, 125.8, 123.8, 120.3, 118.2, 21.4.

IR (KBr) 2920, 2359, 1655, 1606, 1457, 1304, 1113, 763, 685  $\text{cm}^{-1}$ .

HRMS for  $\text{C}_{16}\text{H}_{13}\text{O}_2\text{S}^+(\text{M}^+\text{+H})$ : calcd. 269.06308, found 269.06317.

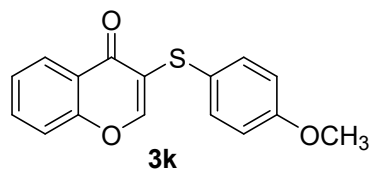

3-((4-methoxyphenyl)thio)-4H-chromen-4-one<sup>6</sup>

Purified by flash chromatograph column (PE : EtOAc = 5 : 1).

Yellow solid (45.8 mg, 81% yield); mp 108-110  $^{\circ}\text{C}$ .

$^1\text{H}$  NMR (500 MHz,  $\text{CDCl}_3$ )  $\delta$  8.21 (dd,  $J$  = 8.0, 1.0 Hz, 1H), 7.89 (s, 1H), 7.66 – 7.63 (m, 1H), 7.47 (d,  $J$  = 9.0 Hz, 2H), 7.42 – 7.37 (m, 2H), 6.85 (d,  $J$  = 9.0 Hz, 2H), 3.77 (s, 3H).

$^{13}\text{C}$  NMR (126 MHz,  $\text{CDCl}_3$ )  $\delta$  175.1, 159.9, 156.3, 155.0, 134.3, 133.8, 126.3, 125.5, 123.4, 123.1, 122.6, 118.1, 115.0, 55.4.

IR (KBr) 2957, 2923, 1647, 1491, 1462, 1243, 825, 755  $\text{cm}^{-1}$ .

HRMS for  $\text{C}_{16}\text{H}_{13}\text{O}_3\text{S}^+(\text{M}^+\text{+H})$ : calcd. 285.05799, found 285.05792.

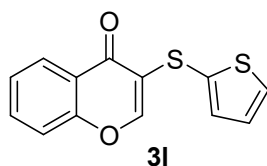

3-(thiophen-2-ylthio)-4H-chromen-4-one<sup>7</sup>

Purified by flash chromatograph column (PE : EtOAc = 3 : 1).

Yellow solid (34.5 mg, 66% yield); mp 82-84  $^{\circ}\text{C}$ .

$^1\text{H}$  NMR (500 MHz,  $\text{CDCl}_3$ )  $\delta$  8.25 – 8.23 (m, 1H), 7.87 (s, 1H), 7.68 – 7.65 (m, 1H), 7.43 – 7.40 (m, 3H), 7.36 (d,  $J$  = 3.0 Hz, 1H), 7.03 – 7.02 (m, 1H).

$^{13}\text{C}$  NMR (126 MHz,  $\text{CDCl}_3$ )  $\delta$  174.9, 156.3, 154.6, 135.9, 134.0, 131.2, 130.1, 128.0, 126.3, 125.7, 123.4, 123.2, 118.2.

IR (KBr) 2920, 1643, 1461, 1344, 1211, 754, 692  $\text{cm}^{-1}$ .

HRMS for  $\text{C}_{13}\text{H}_9\text{O}_2\text{S}_2^+(\text{M}^+\text{+H})$ : calcd. 261.00385, found 261.00388.

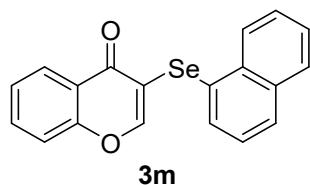



3-(naphthalen-1-ylselanyl)-4H-chromen-4-one<sup>7</sup>

Purified by flash chromatograph column (PE : EtOAc = 10 : 1).

Yellow solid (48.7 mg, 69% yield); mp 79-80 °C.

<sup>1</sup>H NMR (500 MHz, CDCl<sub>3</sub>) δ 8.39 (d, *J* = 8.0 Hz, 1H), 8.23 (dd, *J* = 9.0, 1.5 Hz, 1H), 7.95 (dd, *J* = 7.0, 0.5 Hz, 1H), 7.89 – 7.84 (m, 2H), 7.63 – 7.59 (m, 1H), 7.56 – 7.50 (m, 2H), 7.42 – 7.37 (m, 2H), 7.33 – 7.31 (m, 2H).

<sup>13</sup>C NMR (126 MHz, CDCl<sub>3</sub>) δ 175.5, 156.3, 153.4, 135.4, 134.4, 134.3, 133.8, 130.3, 128.9, 127.8, 127.5, 126.7, 126.2, 126.2, 126.0, 125.5, 122.8, 118.4, 118.1.

IR (KBr) 2921, 1627, 1459, 1312, 1107, 1067, 755, 690 cm<sup>-1</sup>.

HRMS for C<sub>19</sub>H<sub>13</sub>O<sub>2</sub>Se<sup>+</sup>(M<sup>+</sup>+H): calcd. 353.00753, found 353.00751.

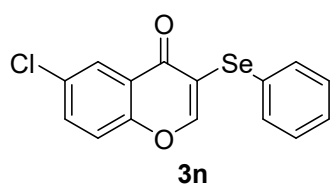

6-chloro-3-(phenylselenanyl)-4H-chromen-4-one<sup>5</sup>

Purified by flash chromatograph column (PE : EtOAc = 10 : 1).

Yellow solid (45.5 mg, 68% yield); mp 110-111 °C.

<sup>1</sup>H NMR (500 MHz, CDCl<sub>3</sub>) δ 8.08 (d, *J* = 2.5 Hz, 1H), 7.74 (s, 1H), 7.52 – 7.49 (m, 3H), 7.29 (d, *J* = 9.0 Hz, 1H), 7.23 – 7.21 (m, 3H).

<sup>13</sup>C NMR (126 MHz, CDCl<sub>3</sub>) δ 174.2, 155.5, 154.8, 134.3, 134.2, 131.6, 129.8, 128.5, 127.7, 125.8, 124.0, 120.0, 118.3.

IR (KBr) 2921, 1640, 1478, 1308, 1115, 1066, 741, 691 cm<sup>-1</sup>.

HRMS for C<sub>15</sub>H<sub>10</sub>ClO<sub>2</sub>Se<sup>+</sup>(M<sup>+</sup>+H): calcd. 336.95291, found 336.95258.

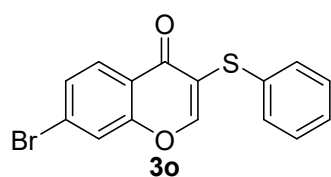

7-bromo-3-(phenylthio)-4H-chromen-4-one<sup>7</sup>

Purified by flash chromatograph column (PE : EtOAc = 15 : 1).

Yellow solid (48.2 mg, 73% yield); mp 135-137 °C.

<sup>1</sup>H NMR (500 MHz, CDCl<sub>3</sub>) δ 8.08 (d, *J* = 8.5 Hz, 1H), 8.04 (s, 1H), 7.65 (d, *J* = 1.0 Hz, 1H), 7.53 (dd, *J* = 8.5, 1.5 Hz, 1H), 7.40 (d, *J* = 7.0 Hz, 2H), 7.30 (t, *J* = 7.0 Hz, 2H), 7.24 (t, *J* = 7.0 Hz, 1H).

<sup>13</sup>C NMR (126 MHz, CDCl<sub>3</sub>) δ 174.4, 156.7, 156.4, 133.4, 130.5, 129.4, 129.4, 128.4, 127.9, 127.5, 122.5, 121.3, 121.1.

IR (KBr) 2921, 1645, 1600, 1417, 1117, 777, 735, 685 cm<sup>-1</sup>.

HRMS for C<sub>15</sub>H<sub>10</sub>BrO<sub>2</sub>S<sup>+</sup>(M<sup>+</sup>+H): calcd. 332.95794, found 332.95798.

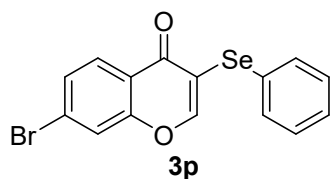

7-bromo-3-(phenylselanyl)-4H-chromen-4-one<sup>5</sup>

Purified by flash chromatograph column (PE : EtOAc = 10 : 1).

Yellow solid (48.7 mg, 64% yield); mp 115-116 °C.

**<sup>1</sup>H NMR (500 MHz, CDCl<sub>3</sub>)** δ 8.06 (d, *J* = 8.5 Hz, 1H), 7.76 (s, 1H), 7.61 – 7.59 (m, 3H), 7.50 (dd, *J* = 9.5, 1.5 Hz, 1H), 7.31 – 7.30 (m, 3H).

**<sup>13</sup>C NMR (126 MHz, CDCl<sub>3</sub>)** δ 174.7, 156.5, 155.1, 134.4, 129.8, 129.3, 128.5, 128.3, 127.9, 127.6, 122.0, 121.3, 118.9.

**IR (KBr)** 2924, 2360, 1616, 1435, 1238, 1078, 1022, 852, 739 cm<sup>-1</sup>.

**HRMS for C<sub>15</sub>H<sub>10</sub>BrO<sub>2</sub>Se<sup>+</sup>(M<sup>+</sup>+H):** calcd. 380.90239, found 380.90204.

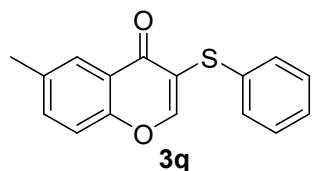

6-methyl-3-(phenylthio)-4H-chromen-4-one<sup>7</sup>

Purified by flash chromatograph column (PE : EtOAc = 15 : 1).

Yellow solid (43.3 mg, 81% yield); mp 102-103 °C.

**<sup>1</sup>H NMR (500 MHz, CDCl<sub>3</sub>)** δ 8.10 (s, 1H), 7.98 (s, 1H), 7.45 (dd, *J* = 8.5, 1.5 Hz, 1H), 7.36 – 7.31 (m, 3H), 7.24 (t, *J* = 7.5 Hz, 2H), 7.17 (t, *J* = 7.5 Hz, 1H), 2.40 (s, 3H).

**<sup>13</sup>C NMR (126 MHz, CDCl<sub>3</sub>)** δ 175.2, 157.5, 154.6, 135.9, 135.3, 134.3, 129.7, 129.2, 127.0, 125.7, 123.4, 119.5, 117.9, 21.0.

**IR (KBr)** 2920, 1639, 1558, 1478, 1307, 1122, 820, 748 cm<sup>-1</sup>.

**HRMS for C<sub>16</sub>H<sub>13</sub>O<sub>2</sub>S<sup>+</sup>(M<sup>+</sup>+H):** calcd. 269.06308, found 269.06351.

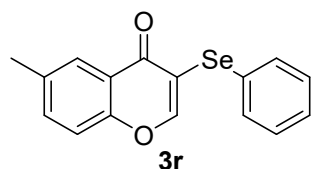

6-methyl-3-(phenylselanyl)-4H-chromen-4-one<sup>5</sup>

Purified by flash chromatograph column (PE : EtOAc = 10 : 1).

Yellow solid (45.4 mg, 72% yield); mp 100-102 °C.

**<sup>1</sup>H NMR (500 MHz, CDCl<sub>3</sub>)** δ 7.91 (s, 1H), 7.79 (s, 1H), 7.50 – 7.48 (m, 2H), 7.37 (dd, *J* = 9.0, 2.0 Hz, 1H), 7.22 – 7.18 (m, 4H), 2.34 (s, 3H).

$^{13}\text{C}$  NMR (126 MHz,  $\text{CDCl}_3$ )  $\delta$  175.3, 156.0, 154.7, 135.7, 135.2, 133.7, 129.6, 128.5, 128.1, 125.7, 122.9, 117.9, 117.5, 21.0.

IR (KBr) 2922, 2359, 1643, 1475, 1311, 1117, 1066, 820, 742  $\text{cm}^{-1}$ .

HRMS for  $\text{C}_{16}\text{H}_{13}\text{O}_2\text{Se}^+(\text{M}^+\text{+H})$ : calcd. 317.00753, found 317.00742.

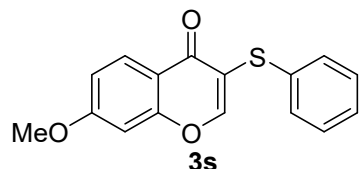

7-methoxy-3-(phenylthio)-4H-chromen-4-one<sup>7</sup>

Purified by flash chromatograph column (PE : EtOAc = 15 : 1).

Yellow solid (45.0 mg, 79% yield); mp 103-105 °C.

$^1\text{H}$  NMR (500 MHz,  $\text{CDCl}_3$ )  $\delta$  8.11 (d,  $J$  = 9.0 Hz, 1H), 8.05 (s, 1H), 7.37 (d,  $J$  = 7.5 Hz, 2H), 7.26 (t,  $J$  = 7.5 Hz, 2H), 7.19 (t,  $J$  = 7.5 Hz, 1H), 6.95 (dd,  $J$  = 9.0, 2.0 Hz, 1H), 6.81 (d,  $J$  = 7.0 Hz, 1H), 3.87 (s, 3H).

$^{13}\text{C}$  NMR (126 MHz,  $\text{CDCl}_3$ )  $\delta$  174.4, 164.4, 158.2, 157.0, 134.4, 129.8, 129.2, 127.9, 127.1, 119.8, 117.6, 115.1, 100.4, 56.0.

IR (KBr) 2959, 1616, 1437, 1270, 1235, 1081, 831, 688  $\text{cm}^{-1}$ .

HRMS for  $\text{C}_{16}\text{H}_{13}\text{O}_3\text{S}^+(\text{M}^+\text{+H})$ : calcd. 285.05799, found 285.05774.

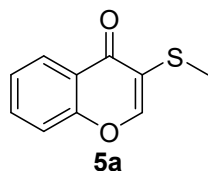

3-(methylthio)-4H-chromen-4-one<sup>2</sup>

Purified by flash chromatograph column (PE : EtOAc = 10 : 1).

Yellow solid (28.7 mg, 75% yield); mp 87-92 °C.

$^1\text{H}$  NMR (500 MHz,  $\text{CDCl}_3$ )  $\delta$  8.26 (dd,  $J$  = 8.0, 1.5 Hz, 1H), 8.06 (s, 1H), 7.70 – 7.66 (m, 1H), 7.47 – 7.41 (m, 2H), 2.41 (s, 3H).

$^{13}\text{C}$  NMR (126 MHz,  $\text{CDCl}_3$ )  $\delta$  175.8, 156.4, 154.1, 133.9, 126.3, 125.6, 123.3, 122.0, 118.2, 16.4.

IR (KBr) 3070, 2922, 1597, 1463, 1253, 1109, 754, 693  $\text{cm}^{-1}$ .

HRMS for  $\text{C}_{10}\text{H}_9\text{O}_2\text{S}^+(\text{M}^+\text{+H})$ : calcd. 193.03178, found 193.03192.

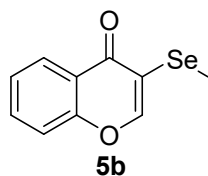

3-(methylselanyl)-4H-chromen-4-one

Purified by flash chromatograph column (PE : EtOAc = 10 : 1).

Yellow solid (31.8 mg, 66% yield); mp 44-45 °C.

**<sup>1</sup>H NMR (500 MHz, CDCl<sub>3</sub>)** δ 8.25 (d, *J* = 9.0 Hz, 1H), 8.06 (s, 1H), 7.70 – 7.66 (m, 1H), 7.46 – 7.41 (m, 2H), 2.41 (s, 3H).

**<sup>13</sup>C NMR (126 MHz, CDCl<sub>3</sub>)** δ 175.8, 156.4, 154.0, 133.9, 126.2, 125.6, 123.3, 122.0, 118.2, 16.4.

**IR (KBr)** 2920, 2851, 1625, 1597, 1463, 1080, 892, 756 cm<sup>-1</sup>.

**HRMS for C<sub>10</sub>H<sub>9</sub>O<sub>2</sub>Se<sup>+</sup>(M<sup>+</sup>+H):** calcd.240.97623, found 240.97635.

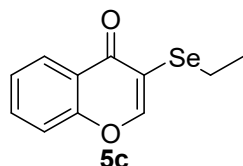

3-(ethylselanyl)-4H-chromen-4-one

Purified by flash chromatograph column (PE : EtOAc = 5 : 1).

Yellow solid (31.4 mg, 62% yield); mp 42-43 °C.

**<sup>1</sup>H NMR (500 MHz, CDCl<sub>3</sub>)** δ 8.24 (dd, *J* = 8.0, 1.5 Hz, 1H), 8.19 (s, 1H), 7.70 – 7.66 (m, 1H), 7.46 – 7.41 (m, 2H), 2.92 (q, *J* = 2.5 Hz, 2H), 1.40 (t, *J* = 7.5 Hz, 3H).

**<sup>13</sup>C NMR (126 MHz, CDCl<sub>3</sub>)** δ 176.0, 156.6, 156.5, 133.9, 126.4, 125.6, 123.3, 118.2, 114.5, 19.9, 15.5.

**IR (KBr)** 2958, 2922, 1610, 1502, 1308, 1069, 769, 689 cm<sup>-1</sup>.

**HRMS for C<sub>11</sub>H<sub>11</sub>O<sub>2</sub>Se<sup>+</sup>(M<sup>+</sup>+H):** calcd.254.99188, found 254.99178.

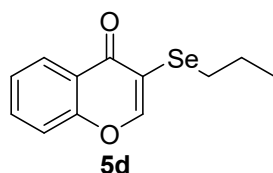

3-(propylselanyl)-4H-chromen-4-one

Purified by flash chromatograph column (PE : EtOAc = 5 : 1).

Yellow solid (36.1 mg, 67% yield); mp 41-42 °C.

**<sup>1</sup>H NMR (500 MHz, CDCl<sub>3</sub>)** δ 8.25 (dd, *J* = 8.0, 1.5 Hz, 1H), 8.19 (s, 1H), 7.80 – 7.66 (m, 1H), 7.46 – 7.41 (m, 2H), 2.89 (t, *J* = 7.5 Hz, 2H), 1.73 – 1.66 (m, 2H), 1.00 (t, *J* = 7.5 Hz, 3H).

**<sup>13</sup>C NMR (126 MHz, CDCl<sub>3</sub>)** δ 176.1, 156.5, 133.8, 126.5, 125.6, 123.4, 118.2, 114.8, 28.5, 23.5, 14.4.

**IR (KBr)** 2924, 2869, 1607, 1554, 1461, 1342, 1058, 752 cm<sup>-1</sup>.

**HRMS for C<sub>12</sub>H<sub>13</sub>O<sub>2</sub>Se<sup>+</sup>(M<sup>+</sup>+H):** calcd. 269.00753, found 269.00766.

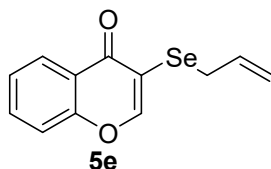

3-(allylselanyl)-4H-chromen-4-one

Purified by flash chromatograph column (PE : EtOAc = 5 : 1).

Yellow solid (41.6 mg, 78% yield); mp 56-57 °C.

**<sup>1</sup>H NMR (500 MHz, CDCl<sub>3</sub>)** δ 8.17 (dd, *J* = 8.0, 1.0 Hz, 1H), 8.08 (s, 1H), 7.63 – 7.59 (m, 1H), 7.39 – 7.35 (m, 2H), 5.85 – 5.76 (m, 1H), 4.86 – 4.79 (m, 2H), 3.44 (d, *J* = 7.5 Hz, 2H).

**<sup>13</sup>C NMR (126 MHz, CDCl<sub>3</sub>)** δ 175.9, 157.9, 156.5, 134.2, 133.9, 126.5, 125.7, 123.5, 118.2, 117.4, 114.1, 28.7.

**IR (KBr)** 2922, 1608, 1461, 1307, 1108, 1070, 755, 691 cm<sup>-1</sup>.

**HRMS for C<sub>12</sub>H<sub>11</sub>O<sub>2</sub>Se<sup>+</sup>(M<sup>+</sup>+H):** calcd. 266.99188, found 266.99197.

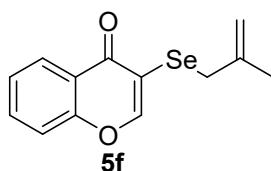

3-((2-methylallyl)selanyl)-4H-chromen-4-one

Purified by flash chromatograph column (PE : EtOAc = 5 : 1).

Yellow solid (40.9 mg, 73% yield); mp 59-60 °C.

**<sup>1</sup>H NMR (500 MHz, CDCl<sub>3</sub>)** δ 8.17 (dd, *J* = 8.0, 1.5 Hz, 1H), 8.05 (s, 1H), 7.62 – 7.59 (m, 1H), 7.38 – 7.34 (m, 2H), 4.63 (s, 1H), 4.52 (s, 1H), 3.43 (s, 2H), 1.77 (s, 3H).

**<sup>13</sup>C NMR (126 MHz, CDCl<sub>3</sub>)** δ 175.7, 157.8, 156.5, 141.4, 133.8, 126.4, 125.6, 123.5, 118.2, 114.5, 114.2, 33.9, 21.1.

**IR (KBr)** 2922, 1608, 1459, 1305, 1059, 759, 689 cm<sup>-1</sup>.

**HRMS for C<sub>13</sub>H<sub>13</sub>O<sub>2</sub>Se<sup>+</sup>(M<sup>+</sup>+H):** calcd. 281.00753, found 281.00754.

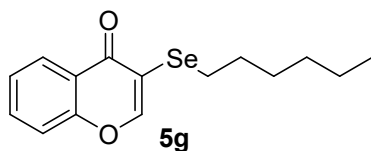

3-(hexylselanyl)-4H-chromen-4-one

Purified by flash chromatograph column (PE : EtOAc = 5 : 1).

Yellow solid (42.5 mg, 69% yield); mp 78-80 °C.

**<sup>1</sup>H NMR (500 MHz, CDCl<sub>3</sub>)** δ 8.23 (dd, *J* = 8.0, 1.5 Hz, 1H), 8.17 (s, 1H), 7.69 – 7.65 (m, 1H), 7.45 – 7.40 (m, 2H), 2.88 (t, *J* = 7.5 Hz, 2H), 1.69 – 1.63 (m, 2H), 1.42 – 1.36 (m, 2H), 1.29 – 1.26 (m, 4H), 0.86 (t, *J* = 7.0 Hz, 3H).

$^{13}\text{C}$  NMR (126 MHz,  $\text{CDCl}_3$ )  $\delta$  175.9, 156.4, 156.2, 133.7, 126.3, 125.5, 123.2, 118.1, 114.8, 31.3, 30.1, 29.4, 26.3, 22.6, 14.0.

IR (KBr) 2922, 2853, 1705, 1606, 1461, 1069, 751, 689  $\text{cm}^{-1}$ .

HRMS for  $\text{C}_{15}\text{H}_{19}\text{O}_2\text{Se}^+(\text{M}^+\text{+H})$ : calcd. 311.05448, found 311.05444.

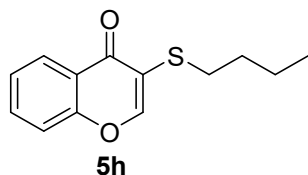

3-(butylthio)-4H-chromen-4-one<sup>6</sup>

Purified by flash chromatograph column (PE : EtOAc = 10 : 1).

Yellow solid (34.8 mg, 74% yield); mp 48-50  $^{\circ}\text{C}$ .

$^1\text{H}$  NMR (500 MHz,  $\text{CDCl}_3$ )  $\delta$  8.25 (dd,  $J = 8.0, 1.5$  Hz, 1H), 8.15 (s, 1H), 7.70 – 7.67 (m, 1H), 7.47 – 7.42 (m, 2H), 2.86 (t,  $J = 7.0$  Hz, 2H), 1.59 – 1.53 (m, 2H), 1.46 – 1.39 (m, 2H), 0.90 (t,  $J = 7.5$  Hz, 3H).

$^{13}\text{C}$  NMR (126 MHz,  $\text{CDCl}_3$ )  $\delta$  176.1, 156.4, 156.1, 133.9, 126.3, 125.6, 123.5, 119.8, 118.2, 32.5, 31.5, 21.8, 13.7.

IR (KBr) 2953, 2868, 1609, 1462, 1352, 1112, 751, 691  $\text{cm}^{-1}$ .

HRMS for  $\text{C}_{13}\text{H}_{15}\text{O}_2\text{S}^+(\text{M}^+\text{+H})$ : calcd. 235.07873, found 235.07903.

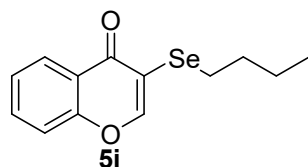

3-(butylselanyl)-4H-chromen-4-one<sup>8</sup>

Purified by flash chromatograph column (PE : EtOAc = 5 : 1).

Yellow solid (37.7 mg, 67% yield); mp 50-51  $^{\circ}\text{C}$ .

$^1\text{H}$  NMR (500 MHz,  $\text{CDCl}_3$ )  $\delta$  8.24 (dd,  $J = 8.0, 1.5$  Hz, 1H), 8.18 (s, 1H), 7.70 – 7.66 (m, 1H), 7.46 – 7.41 (m, 2H), 2.89 (t,  $J = 7.5$  Hz, 2H), 1.68 – 1.62 (m, 2H), 1.46 – 1.38 (m, 2H), 0.90 (t,  $J = 7.5$  Hz, 3H)

$^{13}\text{C}$  NMR (126 MHz,  $\text{CDCl}_3$ )  $\delta$  176.1, 156.4, 133.9, 126.5, 125.6, 123.4, 118.2, 114.9, 36.6, 32.3, 26.1, 22.9, 13.7.

IR (KBr) 2954, 2868, 1723, 1607, 1462, 1113, 750 691  $\text{cm}^{-1}$ .

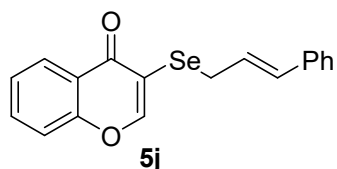

3-(cinnamylselanyl)-4H-chromen-4-one

Purified by flash chromatograph column (PE : EtOAc = 5 : 1).

Yellow solid (44.2 mg, 65% yield); mp 82-83 °C.

**<sup>1</sup>H NMR (500 MHz, CDCl<sub>3</sub>)** δ 8.24 (dd, *J* = 8.0, 1.5 Hz, 1H), 7.79 (s, 1H), 7.66 – 7.63 (m, 1H), 7.44 – 7.35 (m, 4H), 7.29 (t, *J* = 7.5 Hz, 2H), 7.29 (t, *J* = 7.5 Hz, 1H), 6.53 (d, *J* = 16.0 Hz, 1H), 6.38 – 6.32 (m, 1H), 3.40 (d, *J* = 7.0 Hz, 2H).

**<sup>13</sup>C NMR (126 MHz, CDCl<sub>3</sub>)** δ 177.6, 156.6, 152.8, 137.2, 133.6, 132.4, 128.6, 127.4, 126.4, 126.3, 126.0, 125.1, 123.9, 123.4, 118.2, 29.1.

**IR (KBr)** 2958, 2922, 1609, 1452, 1259, 1071, 745, 689 cm<sup>-1</sup>.

**HRMS for C<sub>18</sub>H<sub>15</sub>O<sub>2</sub>Se<sup>+</sup>(M<sup>+</sup>+H):** calcd. 343.02318, found 343.02252.

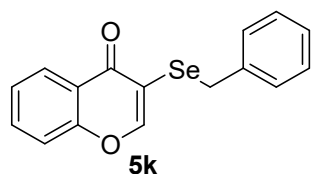

3-(benzylselanyl)-4H-chromen-4-one<sup>5</sup>

Purified by flash chromatograph column (PE : EtOAc = 5 : 1).

Yellow solid (49.4 mg, 78% yield); mp 103-105 °C.

**<sup>1</sup>H NMR (500 MHz, CDCl<sub>3</sub>)** δ 8.27 (dd, *J* = 8.0, 2.0 Hz, 1H), 7.88 (s, 1H), 7.70 – 7.66 (m, 1H), 7.46 – 7.41 (m, 2H), 7.24 – 7.15 (m, 5H), 4.11 (s, 2H).

**<sup>13</sup>C NMR (126 MHz, CDCl<sub>3</sub>)** δ 176.0, 157.8, 156.5, 138.6, 133.9, 129.1, 128.6, 127.0, 126.5, 125.8, 123.5, 118.2, 114.4, 29.9.

**IR (KBr)** 2920, 1701, 1610, 1463, 1346, 1111, 1072, 754, 690 cm<sup>-1</sup>.

**HRMS for C<sub>16</sub>H<sub>13</sub>O<sub>2</sub>Se<sup>+</sup>(M<sup>+</sup>+H):** calcd. 317.00753, found 317.00751.

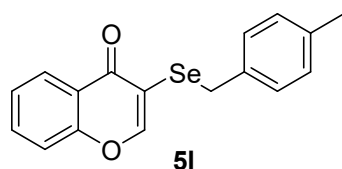

3-((4-methylbenzyl)selanyl)-4H-chromen-4-one

Purified by flash chromatograph column (PE : EtOAc = 5 : 1).

Yellow solid (48.0 mg, 73% yield); mp 101-103 °C

**<sup>1</sup>H NMR (500 MHz, CDCl<sub>3</sub>)** δ 8.18 (dd, *J* = 8.0, 1.5 Hz, 1H), 7.81 (s, 1H), 7.60 – 7.57 (m, 1H), 7.37 – 7.32 (m, 2H), 7.01 – 6.93 (m, 4H), 4.00 (s, 2H), 2.19 (s, 3H).

**<sup>13</sup>C NMR (126 MHz, CDCl<sub>3</sub>)** δ 175.9, 157.5, 156.4, 136.6, 135.4, 133.8, 129.2, 129.0, 126.4, 125.7, 123.4, 118.2, 114.5, 29.6, 21.2.

**IR (KBr)** 2919, 1628, 1461, 1343, 1072, 752, 689 cm<sup>-1</sup>

**HRMS for C<sub>17</sub>H<sub>15</sub>O<sub>2</sub>Se<sup>+</sup>(M<sup>+</sup>+H):** calcd. 331.02318, found 331.02298.

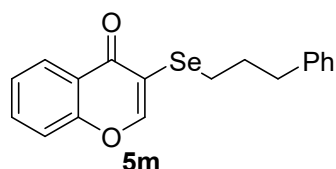

3-(3-phenylpropylselanyl)-4H-chromen-4-one

Purified by flash chromatograph column (PE : EtOAc = 5 : 1).

Yellow oil (40.1 mg, 58% yield).

**<sup>1</sup>H NMR (500 MHz, CDCl<sub>3</sub>)** δ 8.24 (dd, *J* = 8.0, 1.5 Hz, 1H), 8.16 (s, 1H), 7.70 – 7.66 (m, 1H), 7.46 – 7.41 (m, 2H), 7.26 (t, *J* = 7.5 Hz, 2H), 7.19 – 7.15 (m, 3H), 2.90 (t, *J* = 7.5 Hz, 2H), 2.73 (t, *J* = 7.5 Hz, 2H), 2.02 – 1.96 (m, 2H).

**<sup>13</sup>C NMR (126 MHz, CDCl<sub>3</sub>)** δ 176.0, 156.6, 156.5, 141.4, 133.9, 128.6, 128.5, 126.5, 126.1, 125.7, 123.4, 118.2, 114.6, 35.8, 31.8, 25.7

**IR (KBr)** 2922, 1612, 1458, 1340, 1136, 1050, 742, 698 cm<sup>-1</sup>.

**HRMS for C<sub>18</sub>H<sub>17</sub>O<sub>2</sub>Se<sup>+</sup>(M<sup>+</sup>+H):** calcd. 345.03883, found 345.03882.

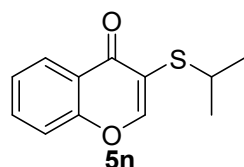

3-(isopropylthio)-4H-chromen-4-one

Purified by flash chromatograph column (PE : EtOAc = 10 : 1).

Yellow solid (31.2 mg, 71% yield); mp 45-46 °C.

**<sup>1</sup>H NMR (500 MHz, CDCl<sub>3</sub>)** δ 8.26 – 8.25 (m, 2H), 7.71 – 7.67 (m, 1H), 7.48 – 7.42 (m, 2H), 3.35 – 3.27 (m, 1H), 1.35 (d, *J* = 7.0 Hz, 6H).

**<sup>13</sup>C NMR (126 MHz, CDCl<sub>3</sub>)** δ 175.6, 156.4, 155.9, 134.1, 126.3, 125.8, 123.6, 123.2, 118.3, 41.8, 22.6.

**IR (KBr)** 2920, 2861, 1610, 1544, 1442, 1339, 1050, 748 cm<sup>-1</sup>

**HRMS for C<sub>12</sub>H<sub>13</sub>O<sub>2</sub>S<sup>+</sup>(M<sup>+</sup>+H):** calcd. 221.06308, found 221.06300.



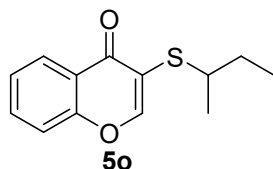

3-(sec-butylthio)-4H-chromen-4-one

Purified by flash chromatograph column (PE : EtOAc = 10 : 1).

Yellow oil (27.3 mg, 58% yield).

**<sup>1</sup>H NMR (500 MHz, CDCl<sub>3</sub>)** δ 8.26 – 8.25 (m, 2H), 7.71 – 7.68 (m, 1H), 7.48 – 7.42 (m, 2H), 3.11 – 3.05 (m, 1H), 1.80 – 1.73 (m, 1H), 1.62 – 1.54 (m, 1H), 1.35 (d, *J* = 7.5 Hz, 3H), 0.98 (t, *J* = 7.5 Hz, 3H).

**<sup>13</sup>C NMR (126 MHz, CDCl<sub>3</sub>)** δ 175.6, 156.4, 155.7, 134.1, 126.3, 125.8, 123.5, 123.2, 118.3, 48.5, 29.0, 20.0, 11.5.

**IR (KBr)** 2925, 1612, 1452, 1335, 1101, 1032, 744, 702 cm<sup>-1</sup>.

**HRMS for C<sub>13</sub>H<sub>15</sub>O<sub>2</sub>S<sup>+</sup>(M<sup>+</sup>+H):** calcd. 235.07873, found 235.07904.

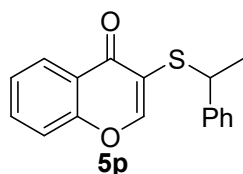

3-((1-phenylethyl)thio)-4H-chromen-4-one

Purified by flash chromatograph column (PE : EtOAc = 10 : 1).

Yellow oil (28.9 mg, 51% yield).

**<sup>1</sup>H NMR (500 MHz, CDCl<sub>3</sub>)** δ 8.23 (dd, *J* = 8.0, 1.5 Hz, 1H), 7.81 (s, 1H), 7.69 – 7.65 (m, 1H), 7.44 – 7.41 (m, 2H), 7.36 (d, *J* = 7.5 Hz, 2H), 7.26 – 7.23 (m, 2H), 7.18 (t, *J* = 7.0 Hz, 1H), 4.91 (q, *J* = 7.0 Hz, 1H), 1.72 (d, *J* = 7.0 Hz, 3H).

**<sup>13</sup>C NMR (126 MHz, CDCl<sub>3</sub>)** δ 175.4, 156.2, 156.2, 141.8, 134.0, 128.6, 128.0, 127.7, 126.3, 125.7, 123.6, 122.1, 118.2, 50.6, 20.9.

**IR (KBr)** 2953, 2916, 1642, 1609, 1555, 1462, 755, 691 cm<sup>-1</sup>.

**HRMS for C<sub>17</sub>H<sub>15</sub>O<sub>2</sub>S<sup>+</sup>(M<sup>+</sup>+H):** calcd. 283.07873, found 283.07693.

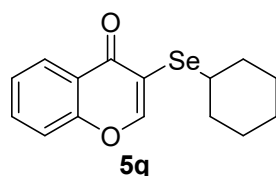

3-(cyclohexylselanyl)-4H-chromen-4-one

Purified by flash chromatograph column (PE : EtOAc = 10 : 1).

Yellow oil (33.0 mg, 54% yield).

**<sup>1</sup>H NMR (500 MHz, CDCl<sub>3</sub>)** δ 8.26 – 8.24 (m, 2H), 7.70 – 7.67 (m, 1H), 7.47 – 7.42 (m, 2H), 7.46 – 3.41 (m, 1H), 2.01 – 1.99 (m, 2H), 1.74 – 1.71 (m, 2H), 1.61 – 1.59 (m, 1H), 1.52 – 1.45 (m, 2H), 1.34 – 1.24 (m, 3H).

**<sup>13</sup>C NMR (126 MHz, CDCl<sub>3</sub>)** δ 176.3, 158.1, 156.6, 133.9, 126.6, 125.7, 123.6, 118.2, 114.2, 41.4, 34.2, 26.8, 25.8.

**IR (KBr)** 2924, 2848, 1610, 1453, 1342, 1214, 755, 699 cm<sup>-1</sup>.

**HRMS for C<sub>15</sub>H<sub>17</sub>O<sub>2</sub>Se<sup>+</sup>(M<sup>+</sup>+H):** calcd. 309.03883, found 309.03876.

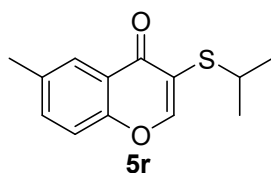

3-(isopropylthio)-6-methyl-4H-chromen-4-one

Purified by flash chromatograph column (PE : EtOAc = 10 : 1).

Yellow solid (33.5 mg, 72% yield); mp 47-48 °C.

**<sup>1</sup>H NMR (500 MHz, CDCl<sub>3</sub>)** δ 8.23 (s, 1H), 8.02 (s, 1H), 7.49 (dd, *J* = 8.5, 2.0 Hz, 1H), 7.36 (d, *J* = 8.5 Hz, 1H), 3.35 – 3.27 (m, 1H), 2.46 (s, 3H), 1.35 (d, *J* = 7.0 Hz, 6H).

**<sup>13</sup>C NMR (126 MHz, CDCl<sub>3</sub>)** δ 175.7, 156.0, 154.7, 135.9, 135.3, 125.5, 123.3, 122.8, 118.0, 41.8, 22.6, 21.1.

**IR (KBr)** 2924, 1607, 1548, 1452, 1324, 1035, 735 cm<sup>-1</sup>.

**HRMS for C<sub>13</sub>H<sub>15</sub>O<sub>2</sub>S<sup>+</sup>(M<sup>+</sup>+H):** calcd. 235.07873, found 235.07878.

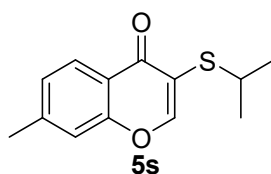

3-(isopropylthio)-7-methyl-4H-chromen-4-one

Purified by flash chromatograph column (PE : EtOAc = 10 : 1).

Yellow solid (33.4 mg, 71% yield); mp 45-46 °C.

**<sup>1</sup>H NMR (500 MHz, CDCl<sub>3</sub>)** δ 8.15 – 8.12 (m, 2H), 7.25 – 7.23 (m, 2H), 3.58 – 3.50 (m, 1H), 2.49 (s, 3H), 1.25 (d, *J* = 7.0 Hz, 6H).

**<sup>13</sup>C NMR (126 MHz, CDCl<sub>3</sub>)** δ 176.3, 157.5, 156.6, 145.4, 127.2, 126.2, 121.5, 119.0, 117.9, 36.2, 23.1, 21.9.

**IR (KBr)** 2958, 2922, 2863, 1620, 1550, 1419, 1347, 776, 693 cm<sup>-1</sup>.

**HRMS for C<sub>13</sub>H<sub>15</sub>O<sub>2</sub>S<sup>+</sup>(M<sup>+</sup>+H):** calcd. 235.07873, found 235.07899.

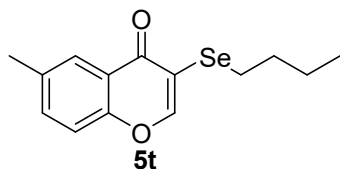

3-(butylselanyl)-6-methyl-4H-chromen-4-one

Purified by flash chromatograph column (PE : EtOAc = 5 : 1).

Yellow solid (40.7 mg, 69% yield); mp 39-40 °C.

**<sup>1</sup>H NMR (500 MHz, CDCl<sub>3</sub>)** δ 8.16 (s, 1H), 8.02 (s, 1H), 7.48 (dd, *J* = 8.5, 1.5 Hz, 1H), 7.34 (d, *J* = 8.5 Hz, 1H), 2.88 (t, *J* = 7.5 Hz, 2H), 2.46 (s, 3H), 1.67 – 1.61 (m, 2H), 1.45 – 1.37 (m, 2H), 0.90 (t, *J* = 7.5 Hz, 3H).

**<sup>13</sup>C NMR (126 MHz, CDCl<sub>3</sub>)** δ 176.1, 156.4, 154.8, 135.6, 135.1, 125.7, 123.0, 117.9, 114.5, 32.3, 26.1, 22.9, 21.1, 13.7.

**IR (KBr)** 2955, 2868, 1615, 1480, 1307, 1068, 924, 771 cm<sup>-1</sup>

**HRMS for C<sub>14</sub>H<sub>17</sub>O<sub>2</sub>Se<sup>+</sup>(M<sup>+</sup>+H):** calcd. 297.03883, found 297.03888.

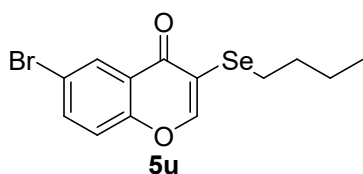

6-bromo-3-(butylselanyl)-4H-chromen-4-one

Purified by flash chromatograph column (PE : EtOAc = 20 : 1).

Yellow solid (45.8 mg, 64% yield); mp 74-76 °C.

**<sup>1</sup>H NMR (500 MHz, CDCl<sub>3</sub>)** δ 8.28 (s, 1H), 8.09 (s, 1H), 7.67 (d, *J* = 8.5 Hz, 1H), 7.28 (d, *J* = 9.0 Hz, 1H), 2.81 (t, *J* = 7.0 Hz, 2H), 1.60 – 1.54 (m, 2H), 1.38 – 1.30 (m, 2H), 0.83 (t, *J* = 7.0 Hz, 3H).

**<sup>13</sup>C NMR (126 MHz, CDCl<sub>3</sub>)** δ 174.8, 156.3, 155.2, 136.8, 129.0, 124.5, 120.2, 119.0, 115.1, 32.2, 26.2, 22.9, 13.7.

**IR (KBr)** 2926, 2865, 1622, 1549, 1457, 1363, 1117, 1067, 893, 813 cm<sup>-1</sup>.

**HRMS for C<sub>13</sub>H<sub>14</sub>BrO<sub>2</sub>Se<sup>+</sup>(M<sup>+</sup>+H):** calcd. 360.93369, found 360.93347.

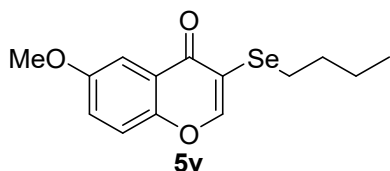

3-(butylselanyl)-6-methoxy-4H-chromen-4-one

Purified by flash chromatograph column (PE : EtOAc = 5 : 1).

Yellow solid (45.6 mg, 73% yield); mp 44-46 °C.

**<sup>1</sup>H NMR (500 MHz, CDCl<sub>3</sub>)** δ 8.17 (s, 1H), 7.58 (d, *J* = 3.0 Hz, 1H), 7.38 (d, *J* = 9.5 Hz, 1H), 7.26 (dd, *J* = 9.0, 3.0 Hz, 1H), 3.90 (s, 3H), 2.89 (t, *J* = 7.5 Hz, 2H), 1.68 – 1.62 (m, 2H), 1.45 – 1.38 (m, 2H), 0.90 (t, *J* = 7.0 Hz, 3H).

**<sup>13</sup>C NMR (126 MHz, CDCl<sub>3</sub>)** δ 175.9, 157.2, 156.3, 151.3, 124.0, 123.9, 119.6, 113.8, 105.3, 56.0, 32.3, 26.1, 22.9, 13.7.

**IR (KBr)** 2927, 2867, 1610, 1480, 1307, 1067, 825, 715 cm<sup>-1</sup>.

**HRMS for C<sub>14</sub>H<sub>17</sub>O<sub>3</sub>Se<sup>+</sup>(M<sup>+</sup>+H):** calcd. 313.03374, found 313.03357.

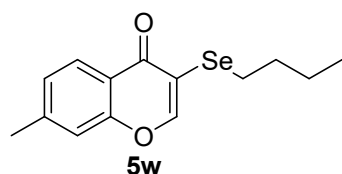

3-(butylselanyl)-7-methyl-4H-chromen-4-one

Purified by flash chromatograph column (PE : EtOAc = 5 : 1).

Yellow oil (36.5 mg, 62% yield).

**<sup>1</sup>H NMR (500 MHz, CDCl<sub>3</sub>)** δ 8.13 – 8.11 (m, 2H), 7.24 – 7.22 (m, 2H), 2.88 (t, *J* = 7.5 Hz, 2H), 2.48 (s, 3H), 1.67 – 1.63 (m, 2H), 1.43 – 1.39 (m, 2H), 0.90 (t, *J* = 7.5 Hz, 3H).

**<sup>13</sup>C NMR (126 MHz, CDCl<sub>3</sub>)** δ 175.9, 156.6, 156.2, 145.2, 127.1, 126.2, 121.1, 117.9, 114.7, 32.3, 26.1, 22.9, 21.9, 13.7.

**IR (KBr)** 2955, 1641, 1609, 1550, 1462, 1306, 1112, 843, 751cm<sup>-1</sup>.

**HRMS for C<sub>14</sub>H<sub>17</sub>O<sub>2</sub>Se<sup>+</sup>(M<sup>+</sup>+H):** calcd. 297.03883, found 297.03864 .

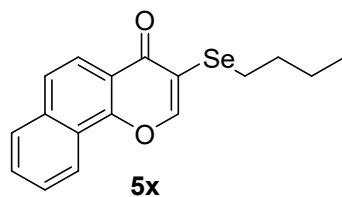

3-(butylselanyl)-4H-benzo[h]chromen-4-one

Purified by flash chromatograph column (PE : EtOAc = 5 : 1).

Yellow solid (34.3 mg, 52% yield); mp 84-85 °C.

**<sup>1</sup>H NMR (500 MHz, CDCl<sub>3</sub>)** δ 8.47 (d, *J* = 8.5 Hz, 1H), 8.33 (s, 1H), 8.18 (d, *J* = 9.0 Hz, 1H), 7.94 (d, *J* = 7.5 Hz, 1H), 7.79 (d, *J* = 8.5 Hz, 1H), 7.74 – 7.67 (m, 2H), 2.95 (t, *J* = 7.5 Hz, 2H), 1.72 – 1.66 (m, 2H), 1.48 – 1.41 (m, 2H), 0.92 (t, *J* = 7.5 Hz, 3H).

**<sup>13</sup>C NMR (126 MHz, CDCl<sub>3</sub>)** δ 175.9, 155.0, 154.0, 135.9, 129.6, 128.3, 127.4, 125.8, 124.1, 122.4, 121.3, 119.5, 116.8, 32.3, 25.9, 23.0, 13.7.

**IR (KBr)** 2922, 2853, 1720, 1462, 1354, 1080, 759, 690 cm<sup>-1</sup>.

**HRMS for C<sub>17</sub>H<sub>17</sub>O<sub>2</sub>Se<sup>+</sup>(M<sup>+</sup>+H):** calcd. 333.03883, found 333.03888.

## References

1. H.-Y. Liu, J.-R. Zhang, G.-B. Huang, Y.-H. Zhou, Y.-Y. Chen, Y.-L. Xu, *Adv. Synth. Catal.* **2021**, *363*, 1656- 1661.
2. Q. Tang, Z. Bian, W. Wu, J. Wang, P. Xie, C. U. Pittman, Jr., A. Zhou, *J. Org. Chem.* **2017**, *82*, 10617-10622.
3. J. Zhu, B. Xu, J. Yu, Y. Ren, J. Wang, P. Xie, C. U. Pittman, Jr., A. Zhou, *Org. Biomol. Chem.*, **2018**, *16*, 5999-6005.
4. H.-Y. Liu, J.-R. Zhang, G.-B. Huang, Y.-H. Zhou, Y.-Y. Chen, Y.-L. Xu, *Adv. Synth. Catal.* **2021**, *363*, 1656-1661
5. C. Ding, Y. Yu, Q. Yu, Z. Xie, Y. Zhou, J. Zhou, G. Liang, Z. Song, *ChemCatChem*, **2018**, *10*, 5397-5401.
6. P. Xu, Z. Zhong, H. Huang, W. Pan, Y. Zhang, A. Zhou, *Tetrahedron*, **2022**, *124*, 133018.
7. T. Guo, *Synthetic Commun.*, **2017**, *47*, 2053–2061
8. C. V. Doerner, J. S. S. Neto, C. R. Cabreira, S. Saba, L. P. Sandjo, J. Rafique, A. L. Braga, F. F. de Assis, *New J. Chem.*, **2023**, *47*, 5598–5602

## 5 Copies of $^1\text{H}$ and $^{13}\text{C}$ NMR Spectra

$^1\text{H}$  NMR (500 MHz,  $\text{CDCl}_3$ ) of **3a**

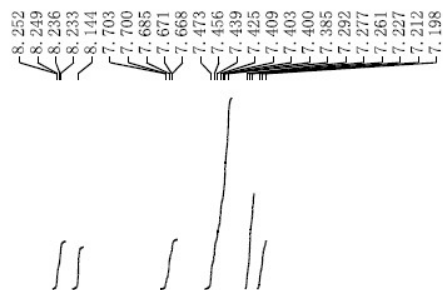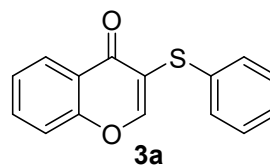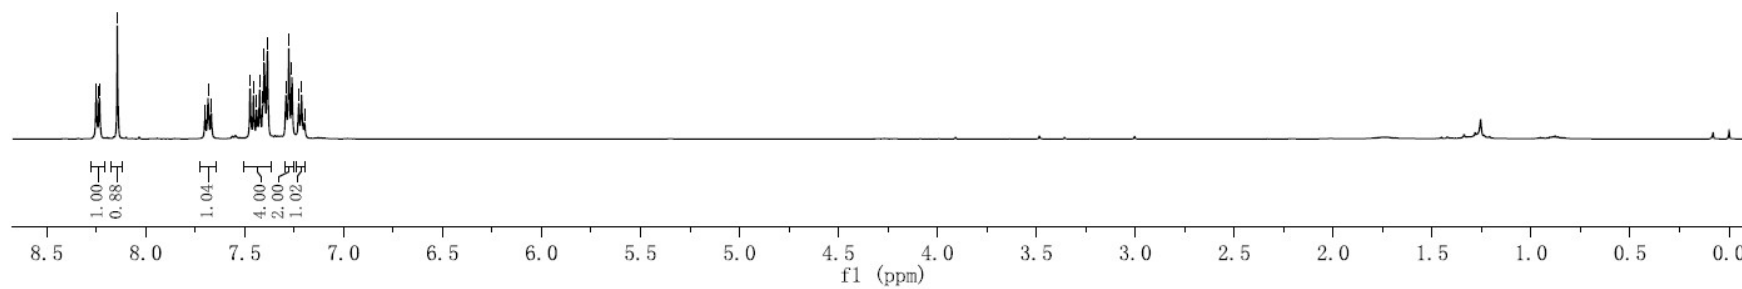

$^{13}\text{C}$  NMR (126 MHz,  $\text{CDCl}_3$ ) of **3a**

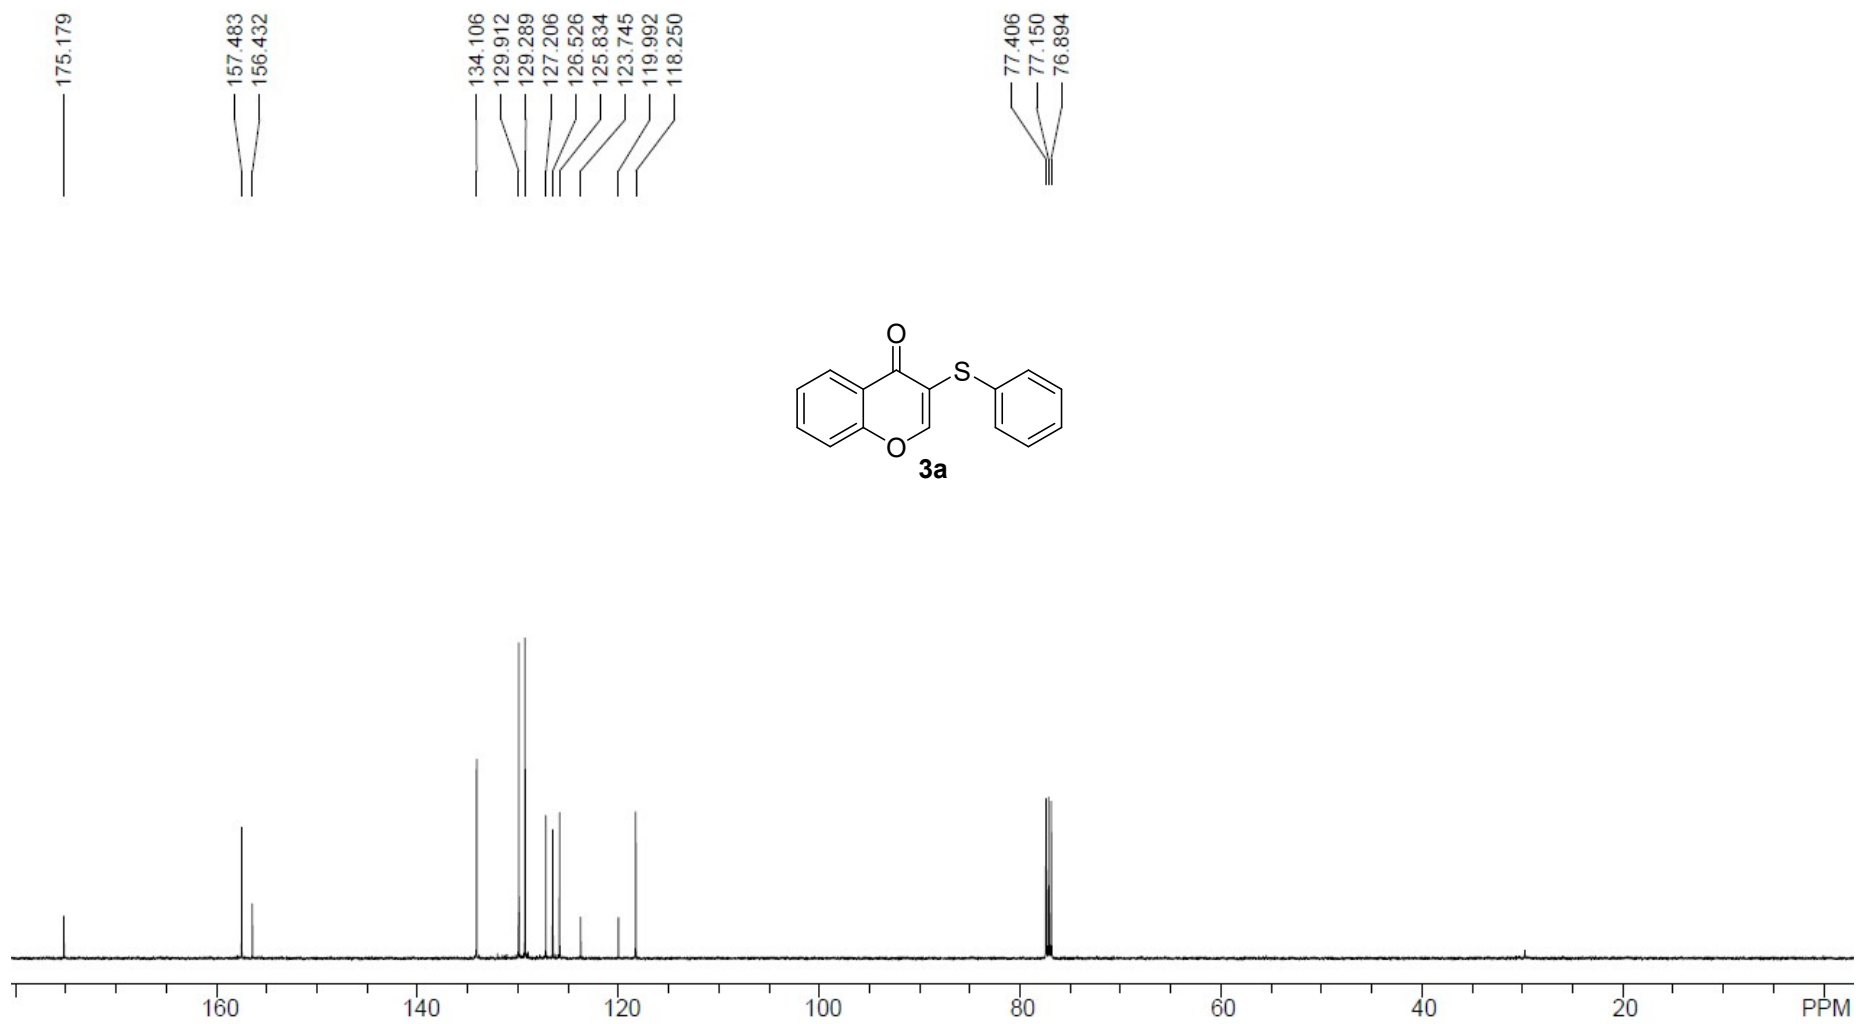

$^1\text{H}$  NMR (500 MHz,  $\text{CDCl}_3$ ) of **3b**

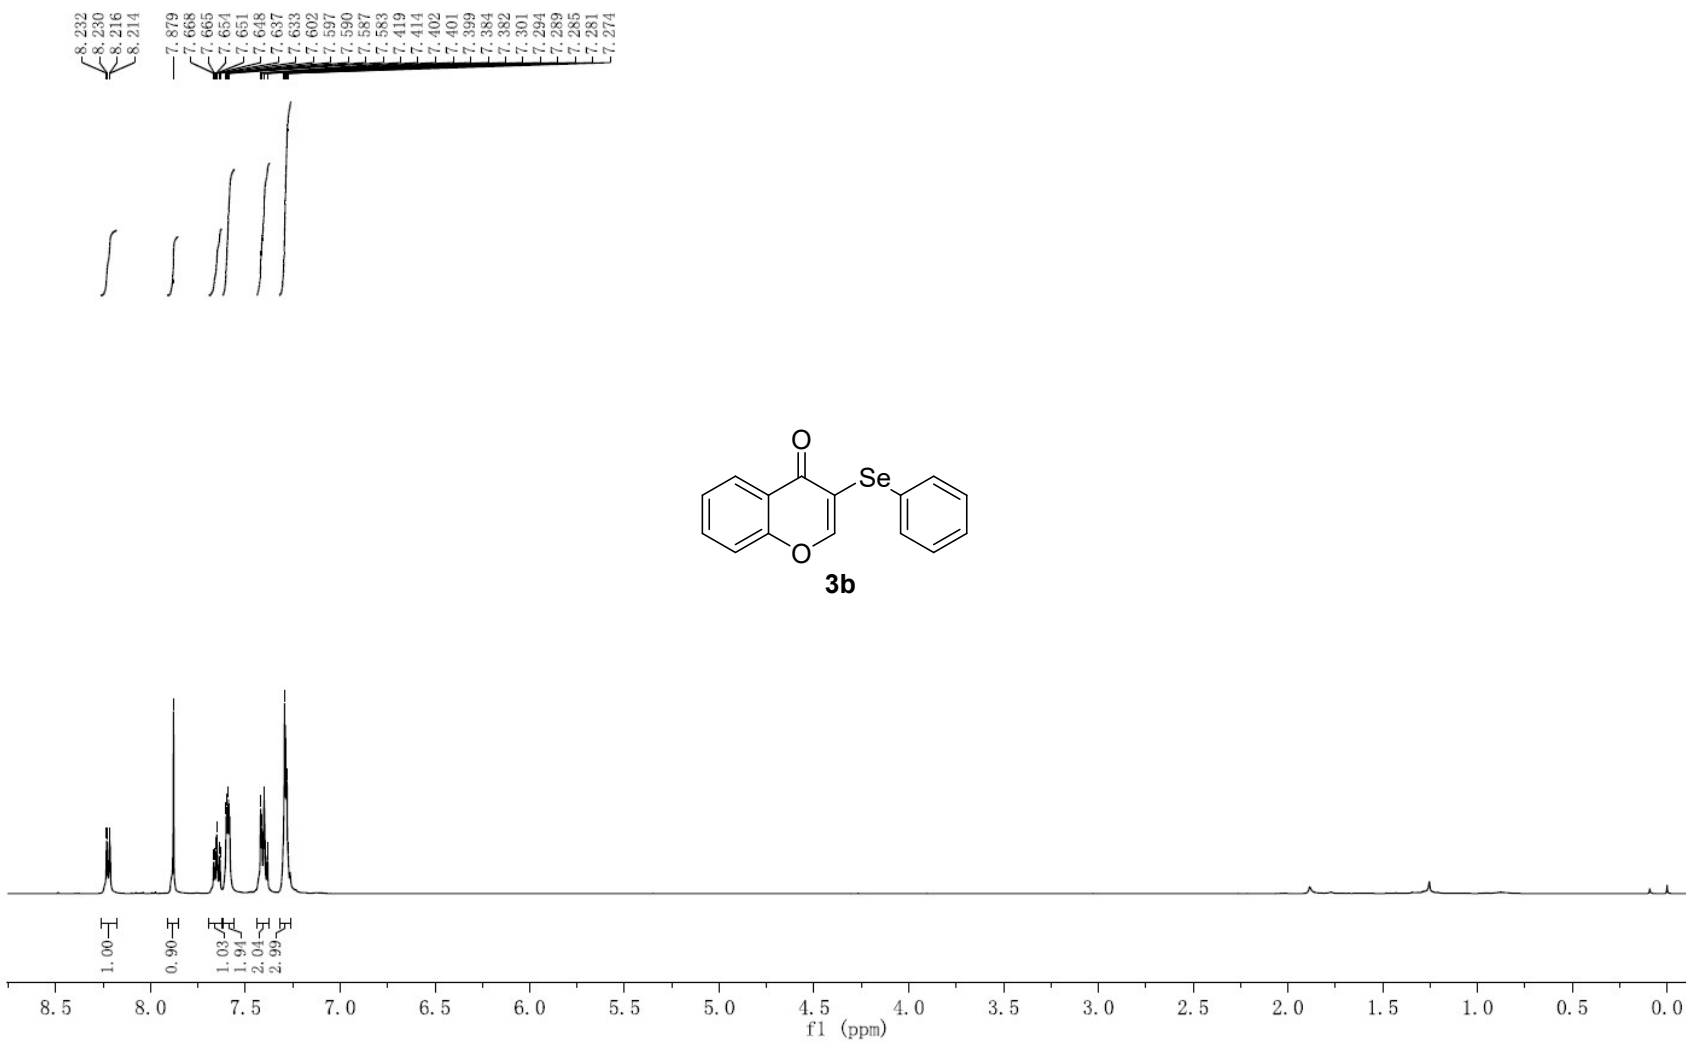



$^{13}\text{C}$  NMR (126 MHz,  $\text{CDCl}_3$ ) of **3b**

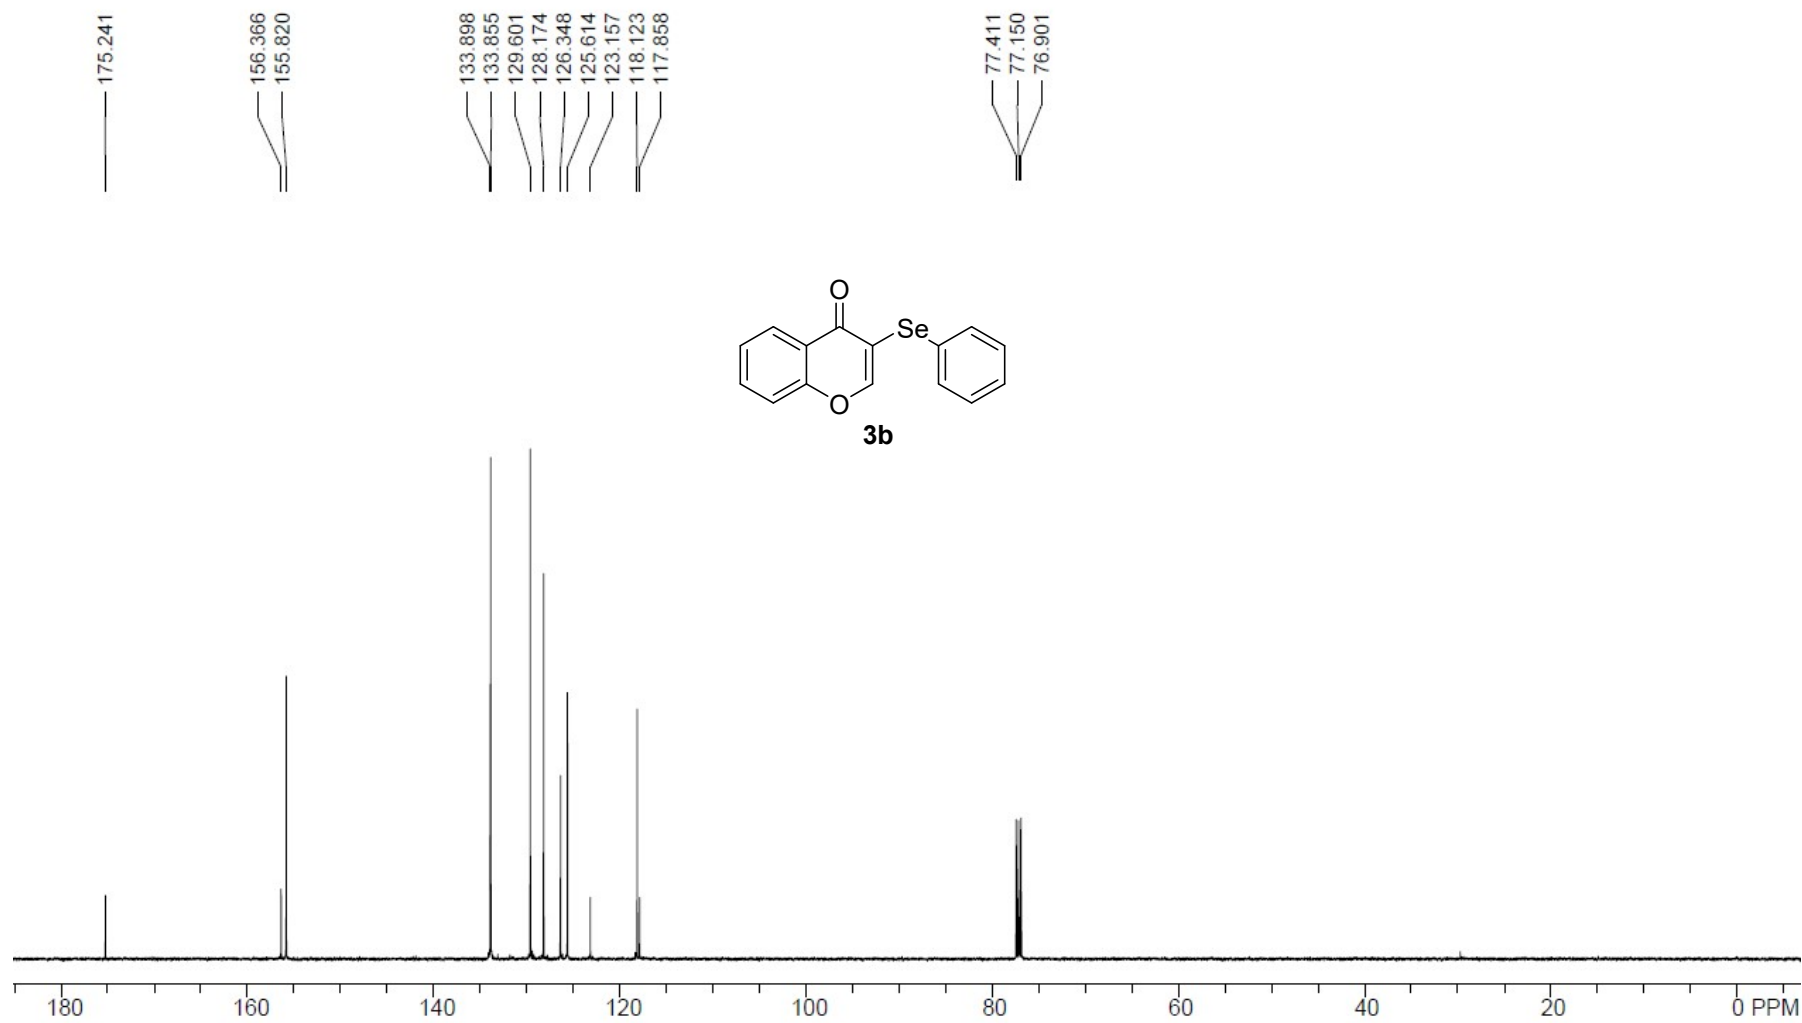

$^1\text{H}$  NMR (500 MHz,  $\text{CDCl}_3$ ) of **3c**

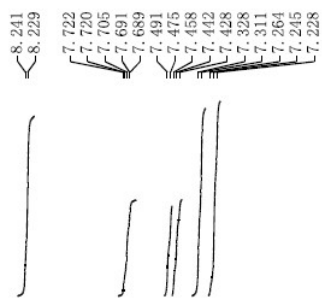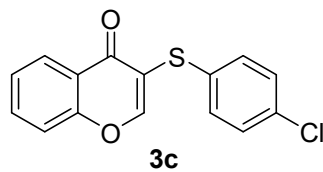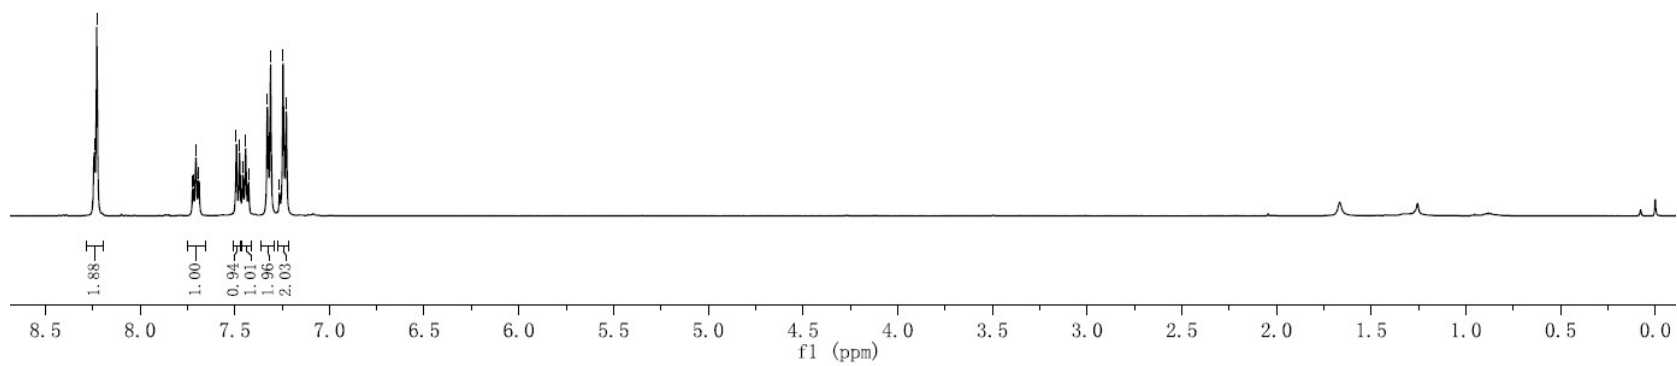

$^{13}\text{C}$  NMR (126 MHz,  $\text{CDCl}_3$ ) of **3c**

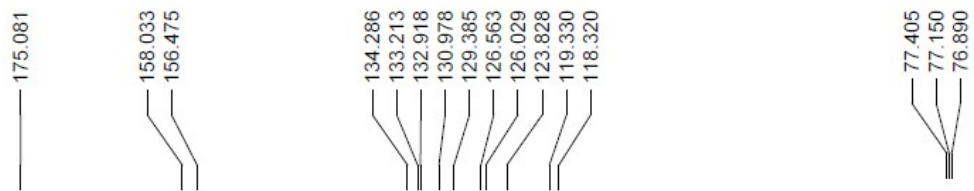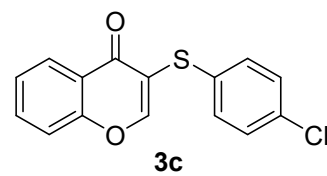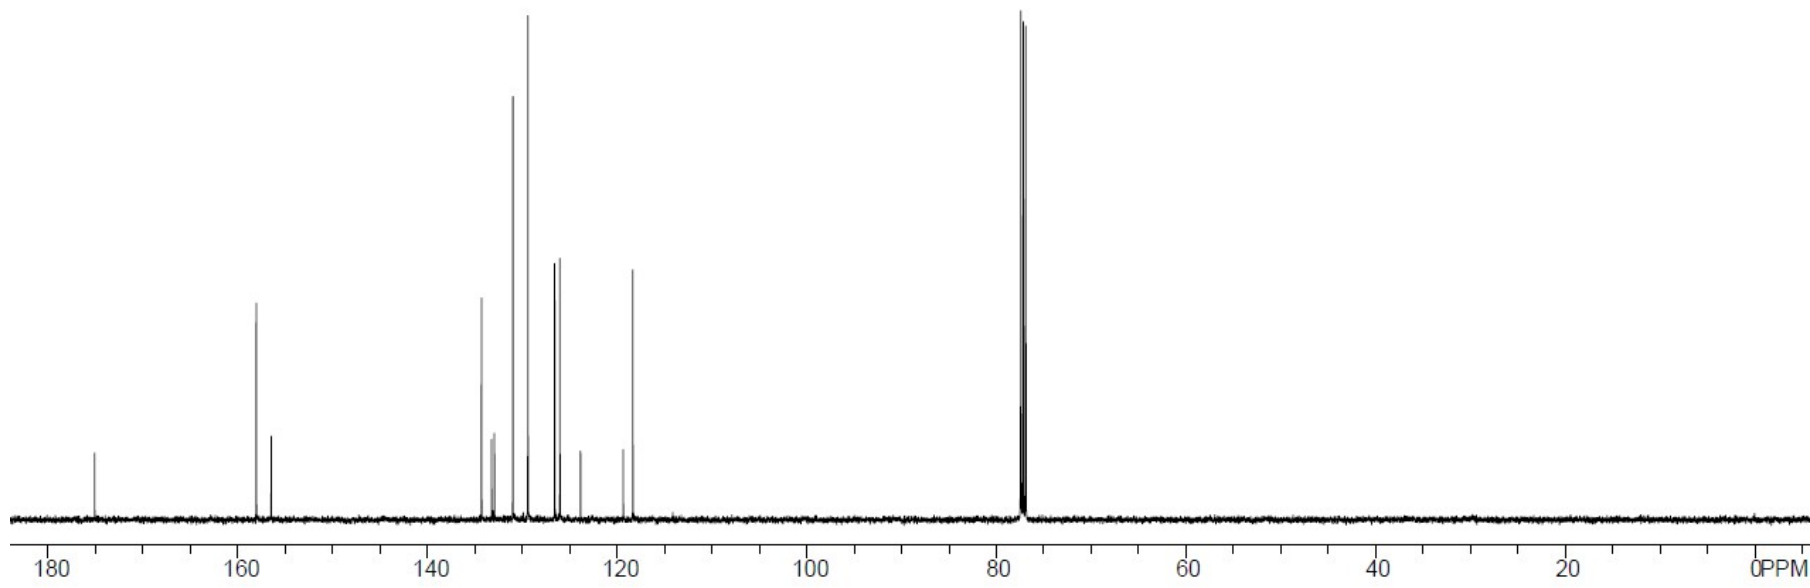

$^1\text{H}$  NMR (500 MHz,  $\text{CDCl}_3$ ) of **3d**

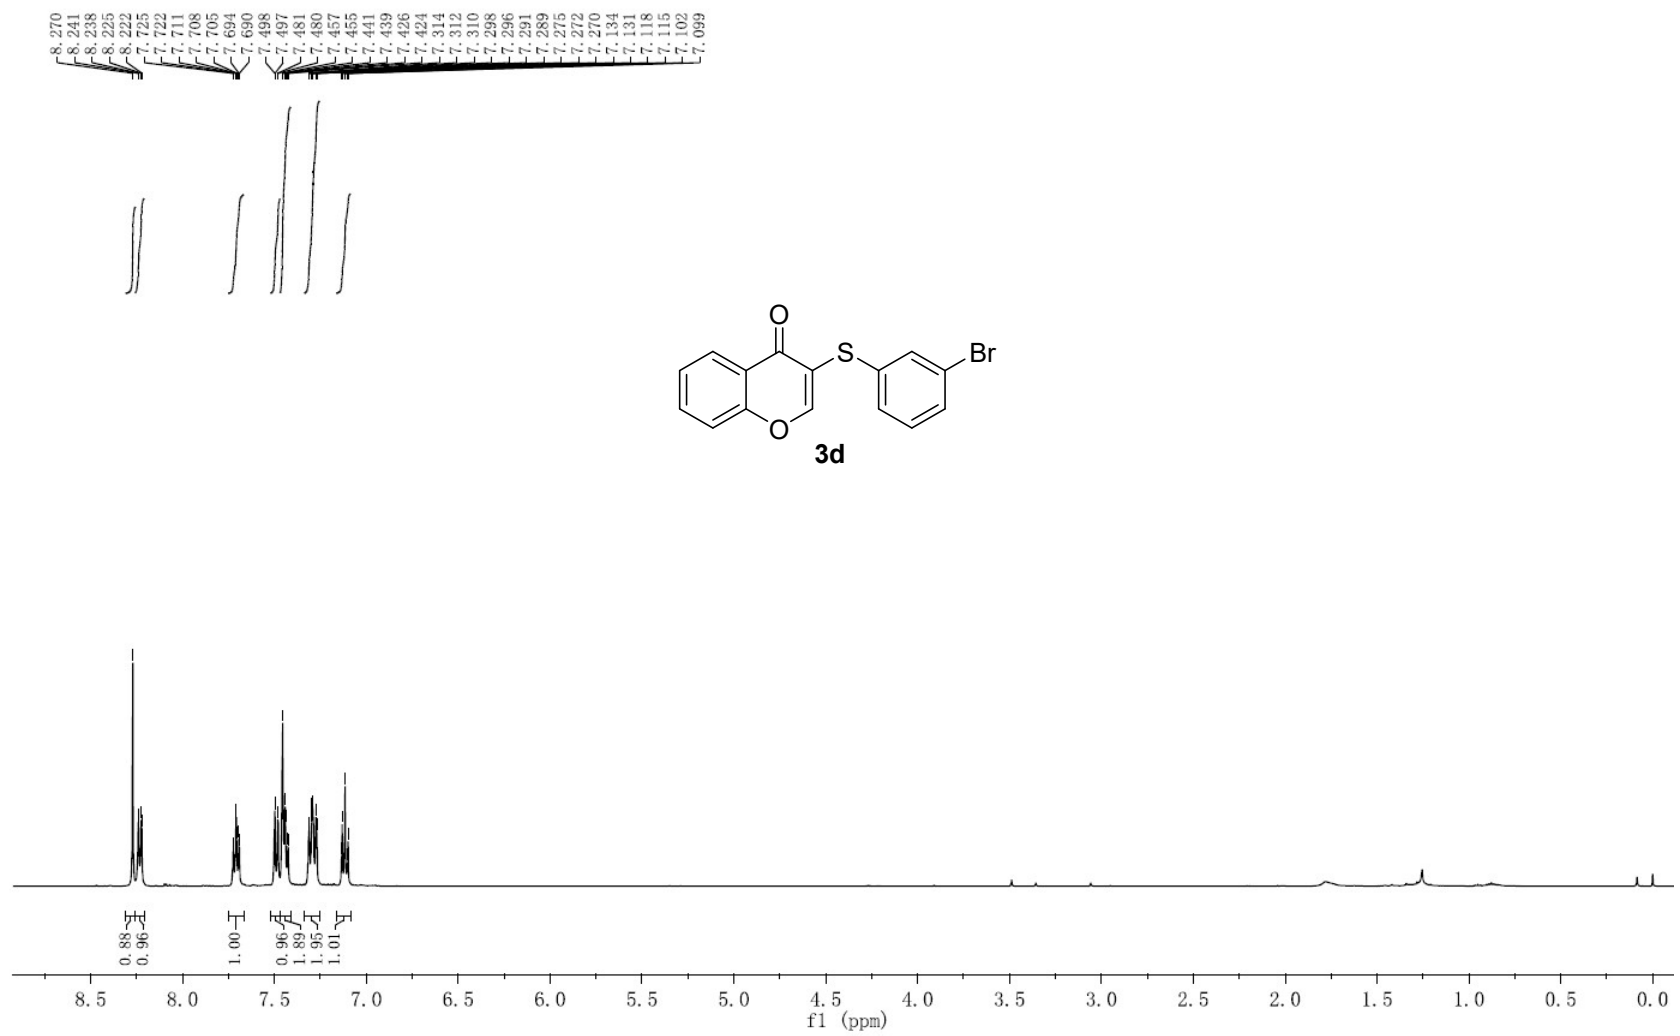

$^{13}\text{C}$  NMR (126 MHz,  $\text{CDCl}_3$ ) of **3d**

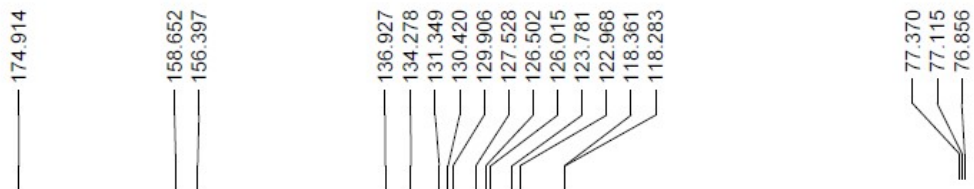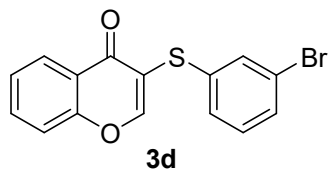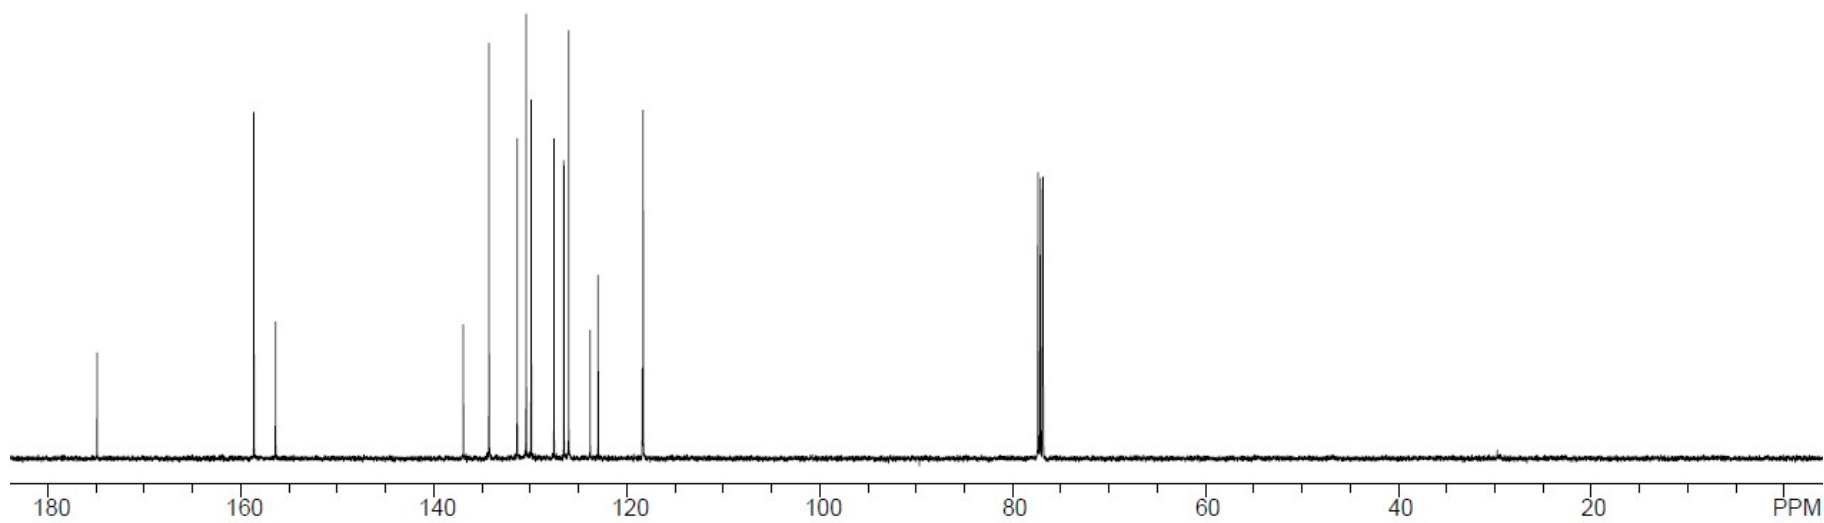

$^1\text{H}$  NMR (500 MHz,  $\text{CDCl}_3$ ) of **3e**

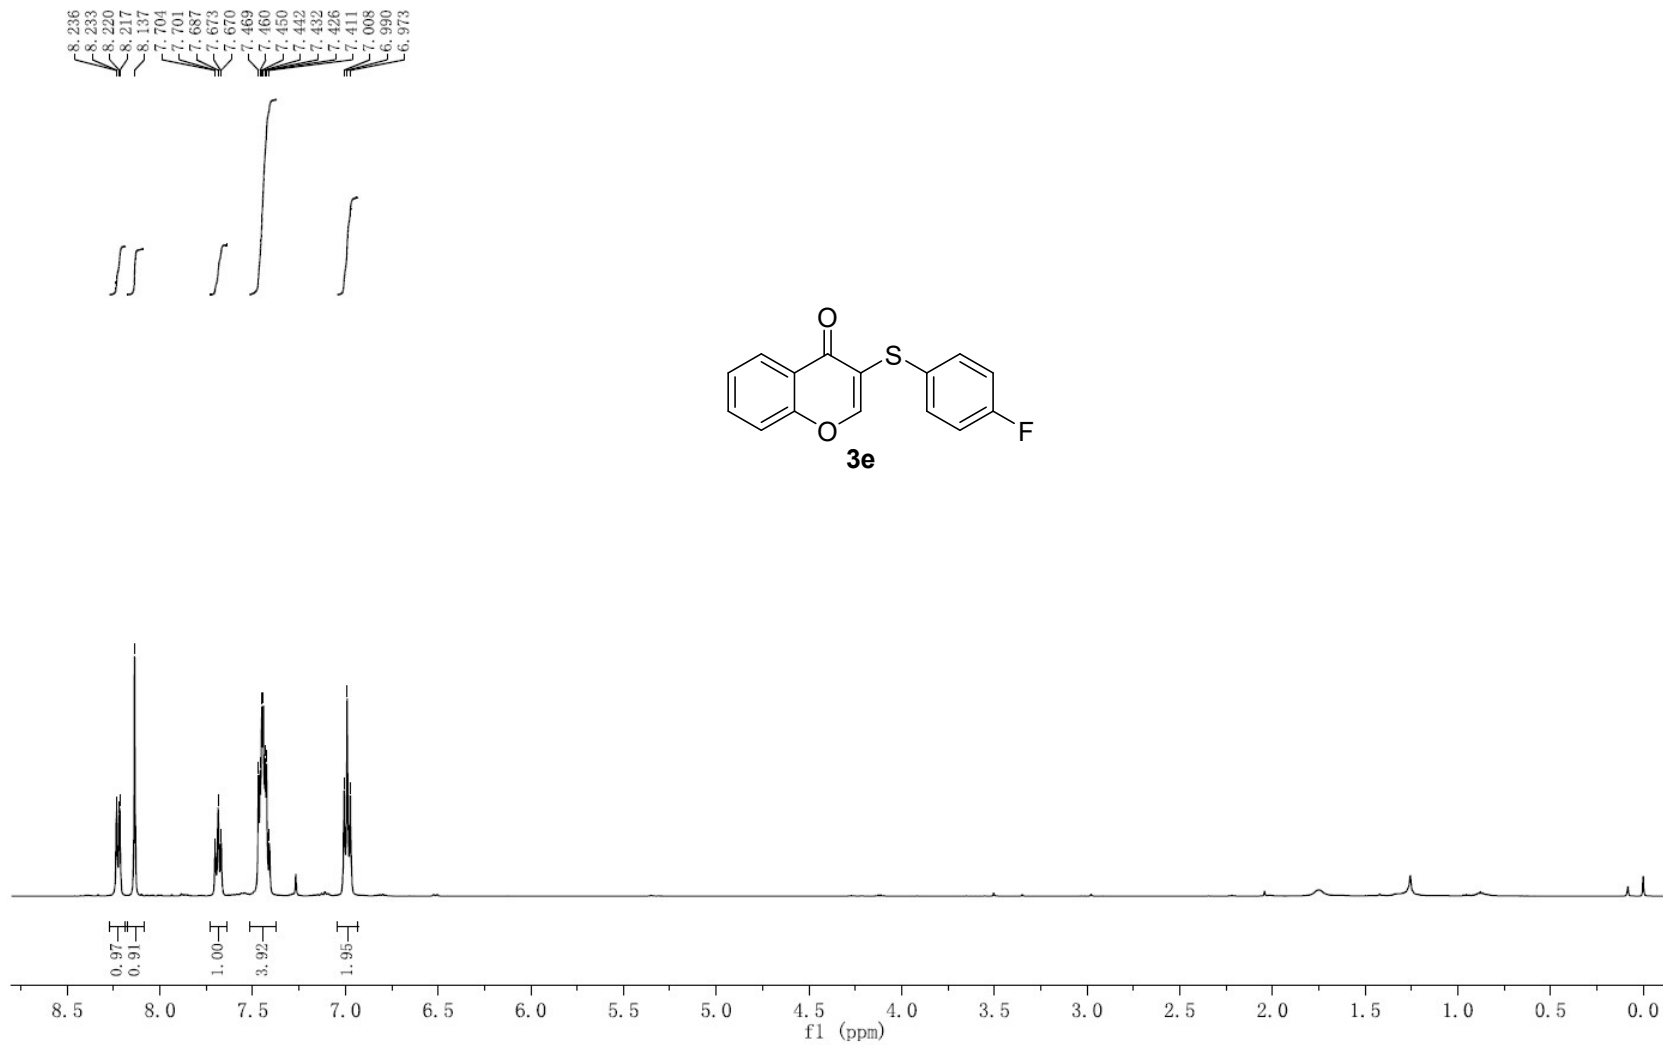

$^{13}\text{C}$  NMR (126 MHz,  $\text{CDCl}_3$ ) of **3e**

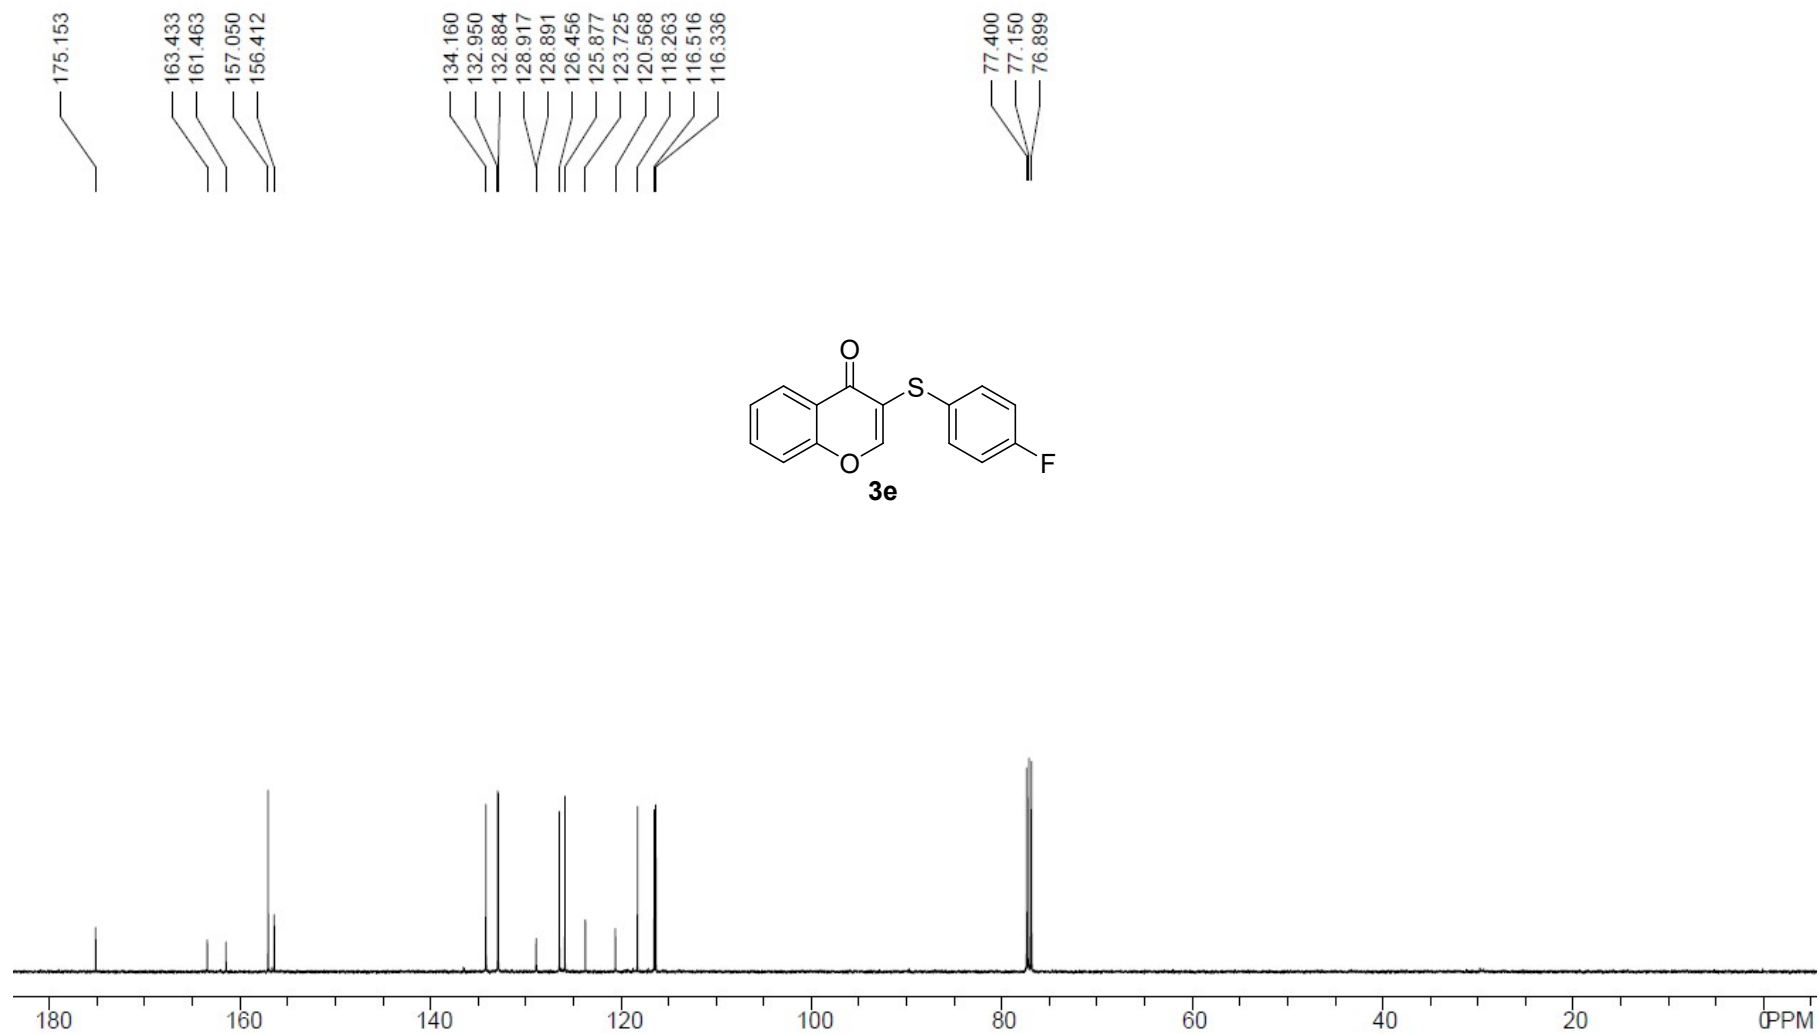

$^{19}\text{F}$  NMR (471 MHz,  $\text{CDCl}_3$ ) of **3e**

114.049

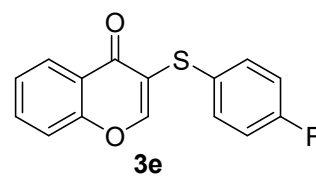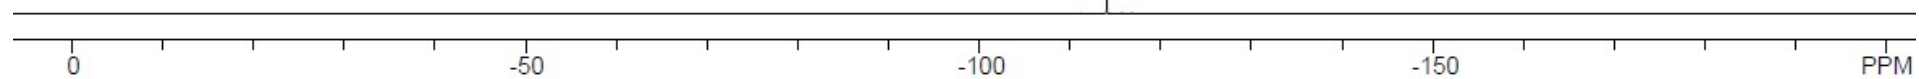



$^1\text{H}$  NMR (500 MHz,  $\text{CDCl}_3$ ) of **3f**

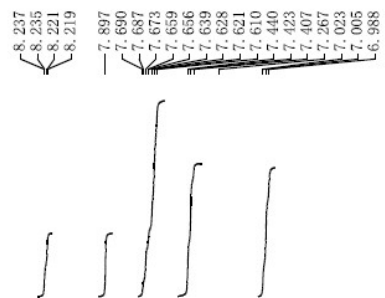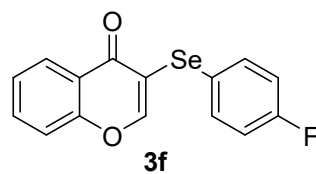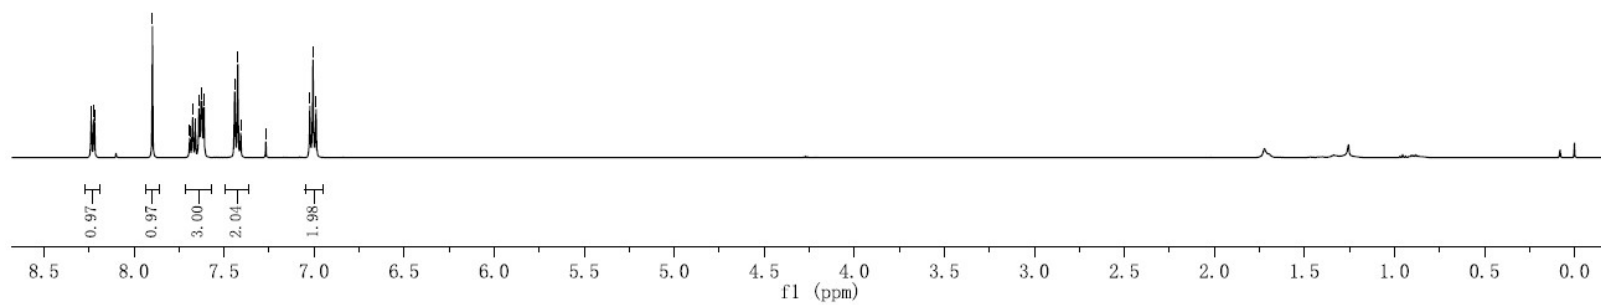

$^{13}\text{C}$  NMR (126 MHz,  $\text{CDCl}_3$ ) of **3f**

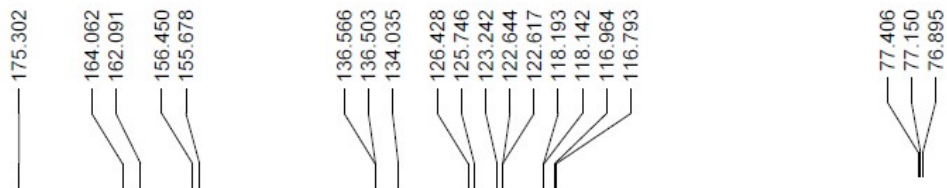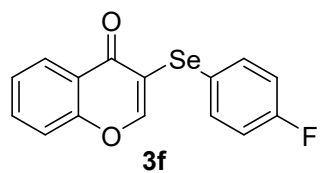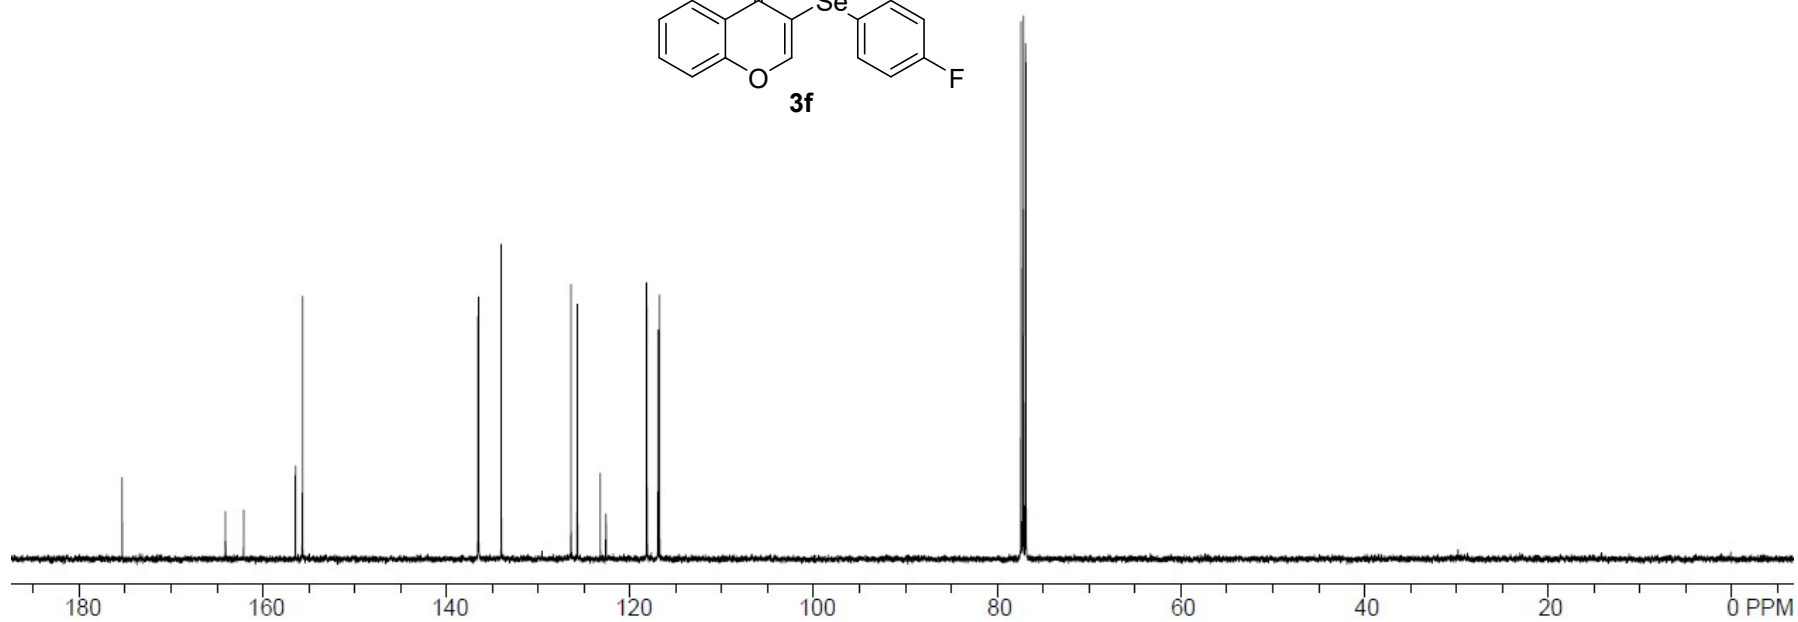

$^1\text{H}$  NMR (500 MHz,  $\text{CDCl}_3$ ) of **3g**

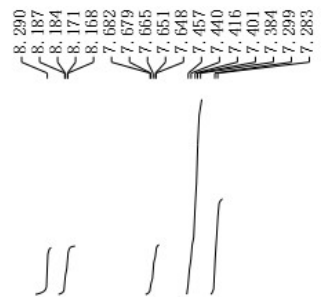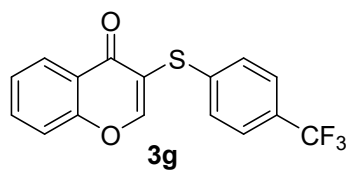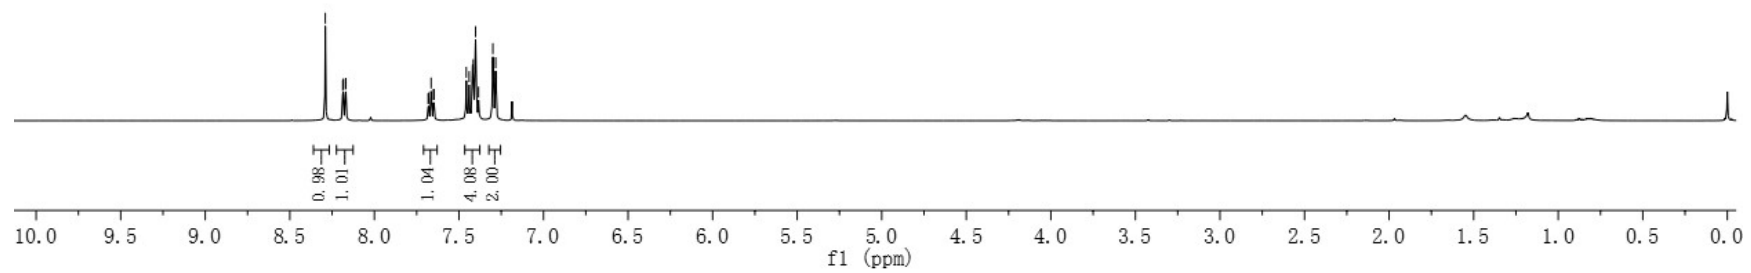

$^{13}\text{C}$  NMR (126 MHz,  $\text{CDCl}_3$ ) of **3g**

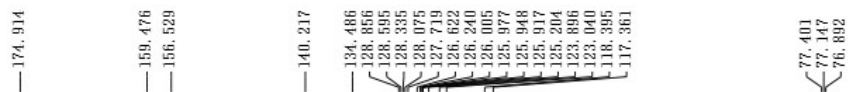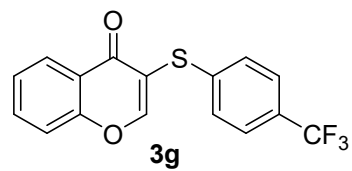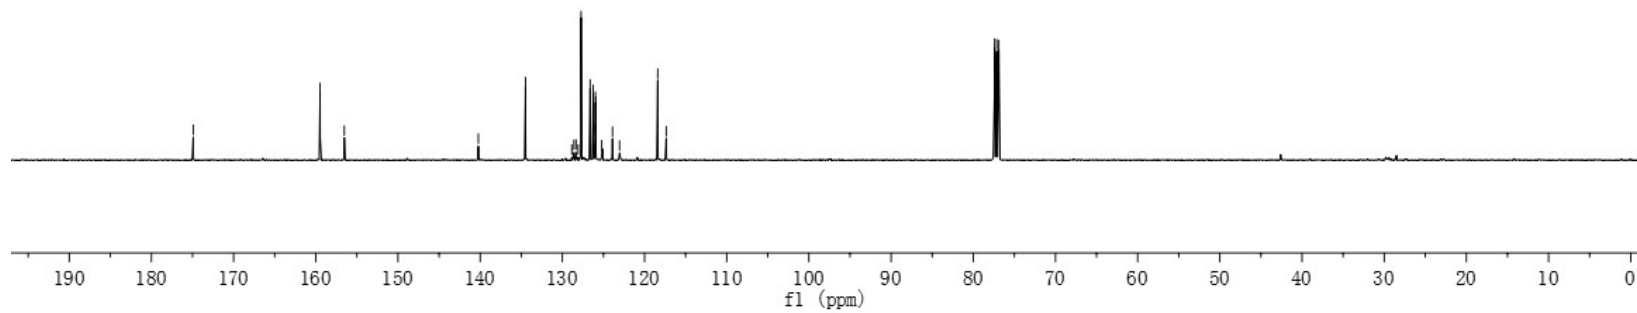

$^{19}\text{F}$  NMR (471 MHz,  $\text{CDCl}_3$ ) of **3g**

62.496

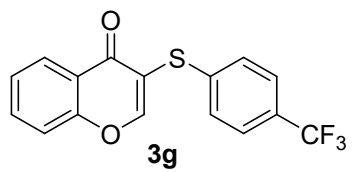

0 -50 -100 -150 PPM

$^1\text{H}$  NMR (500 MHz,  $\text{CDCl}_3$ ) of **3h**

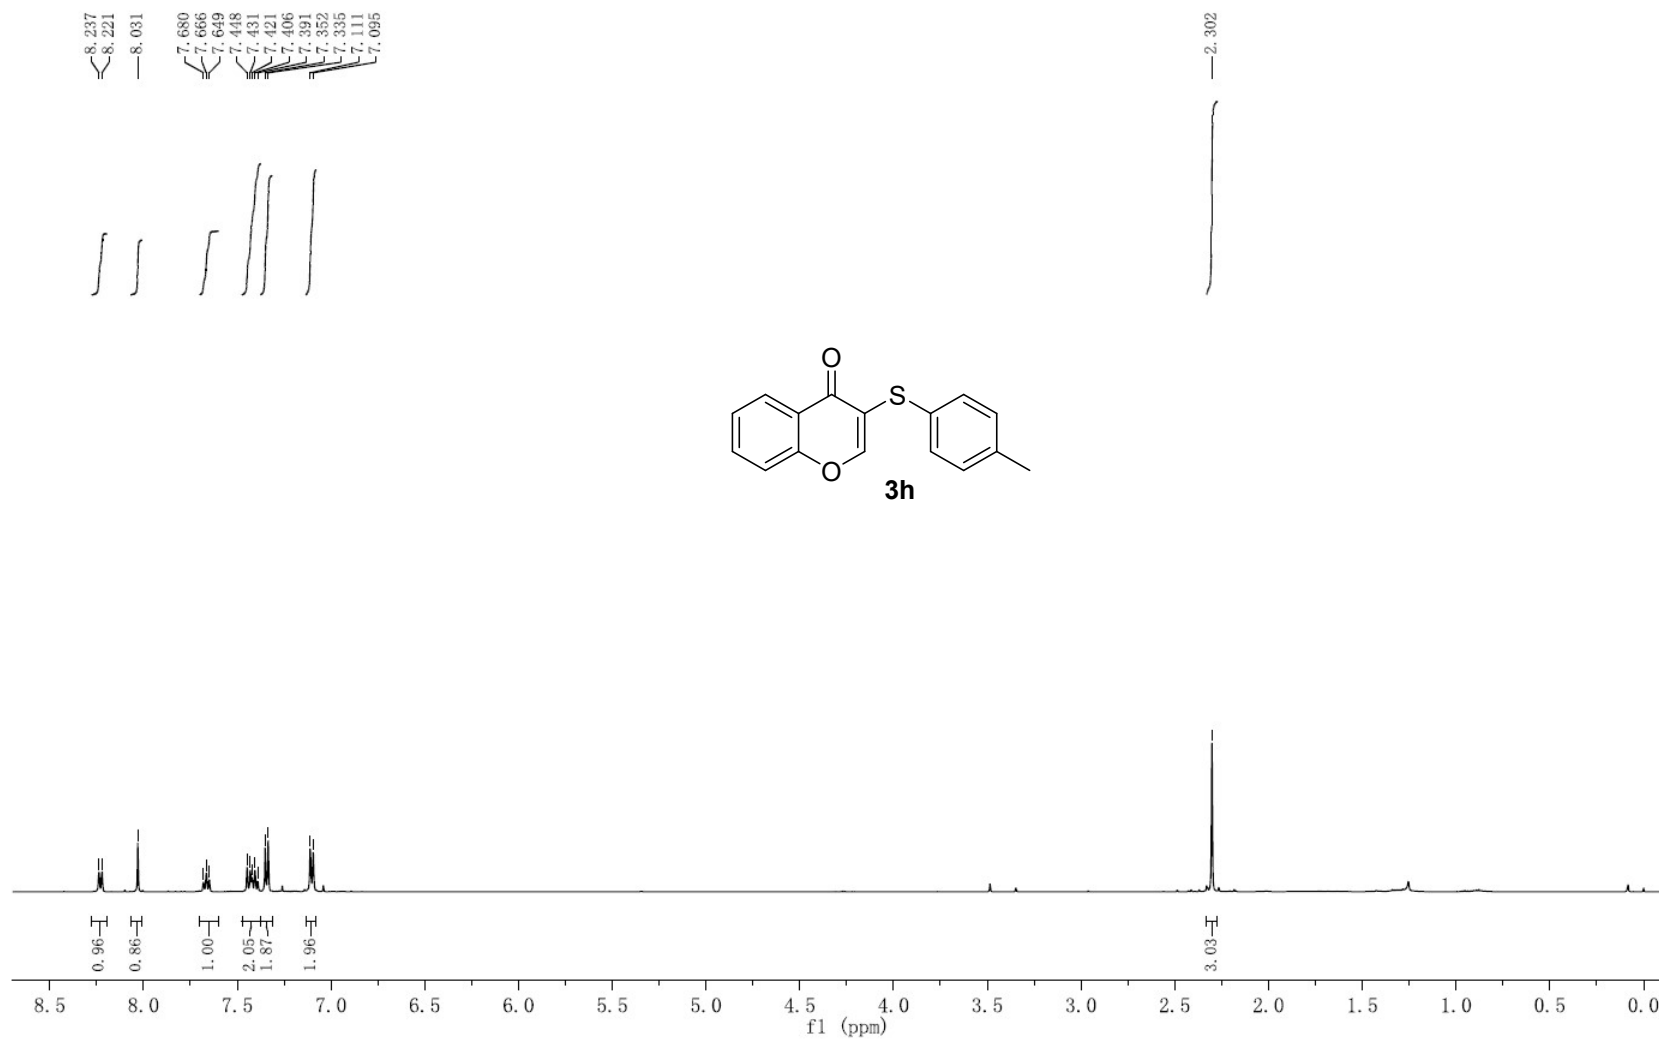

$^{13}\text{C}$  NMR (126 MHz,  $\text{CDCl}_3$ ) of **3h**

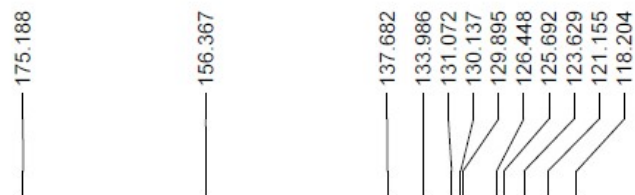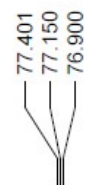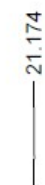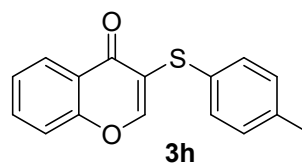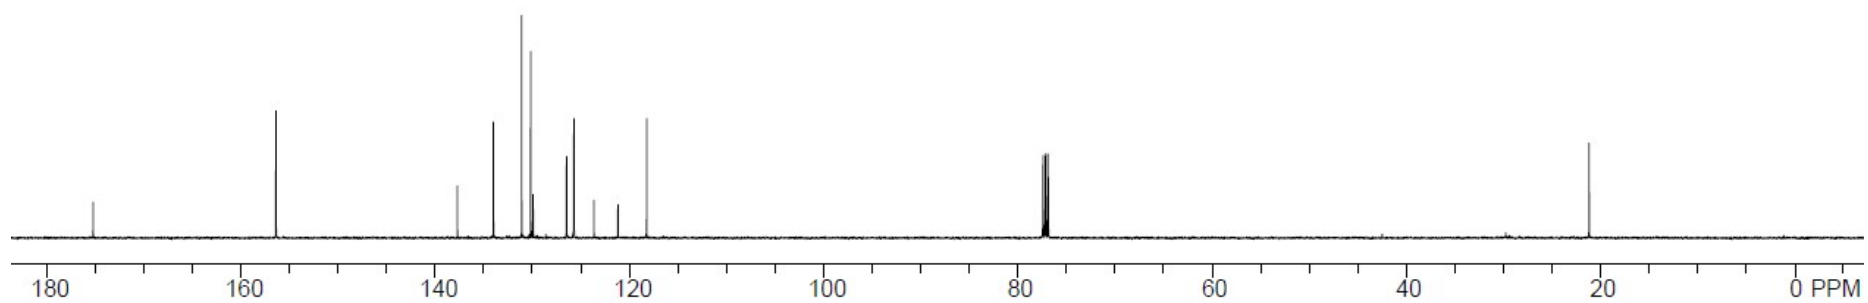

$^1\text{H}$  NMR (500 MHz,  $\text{CDCl}_3$ ) of **3i**

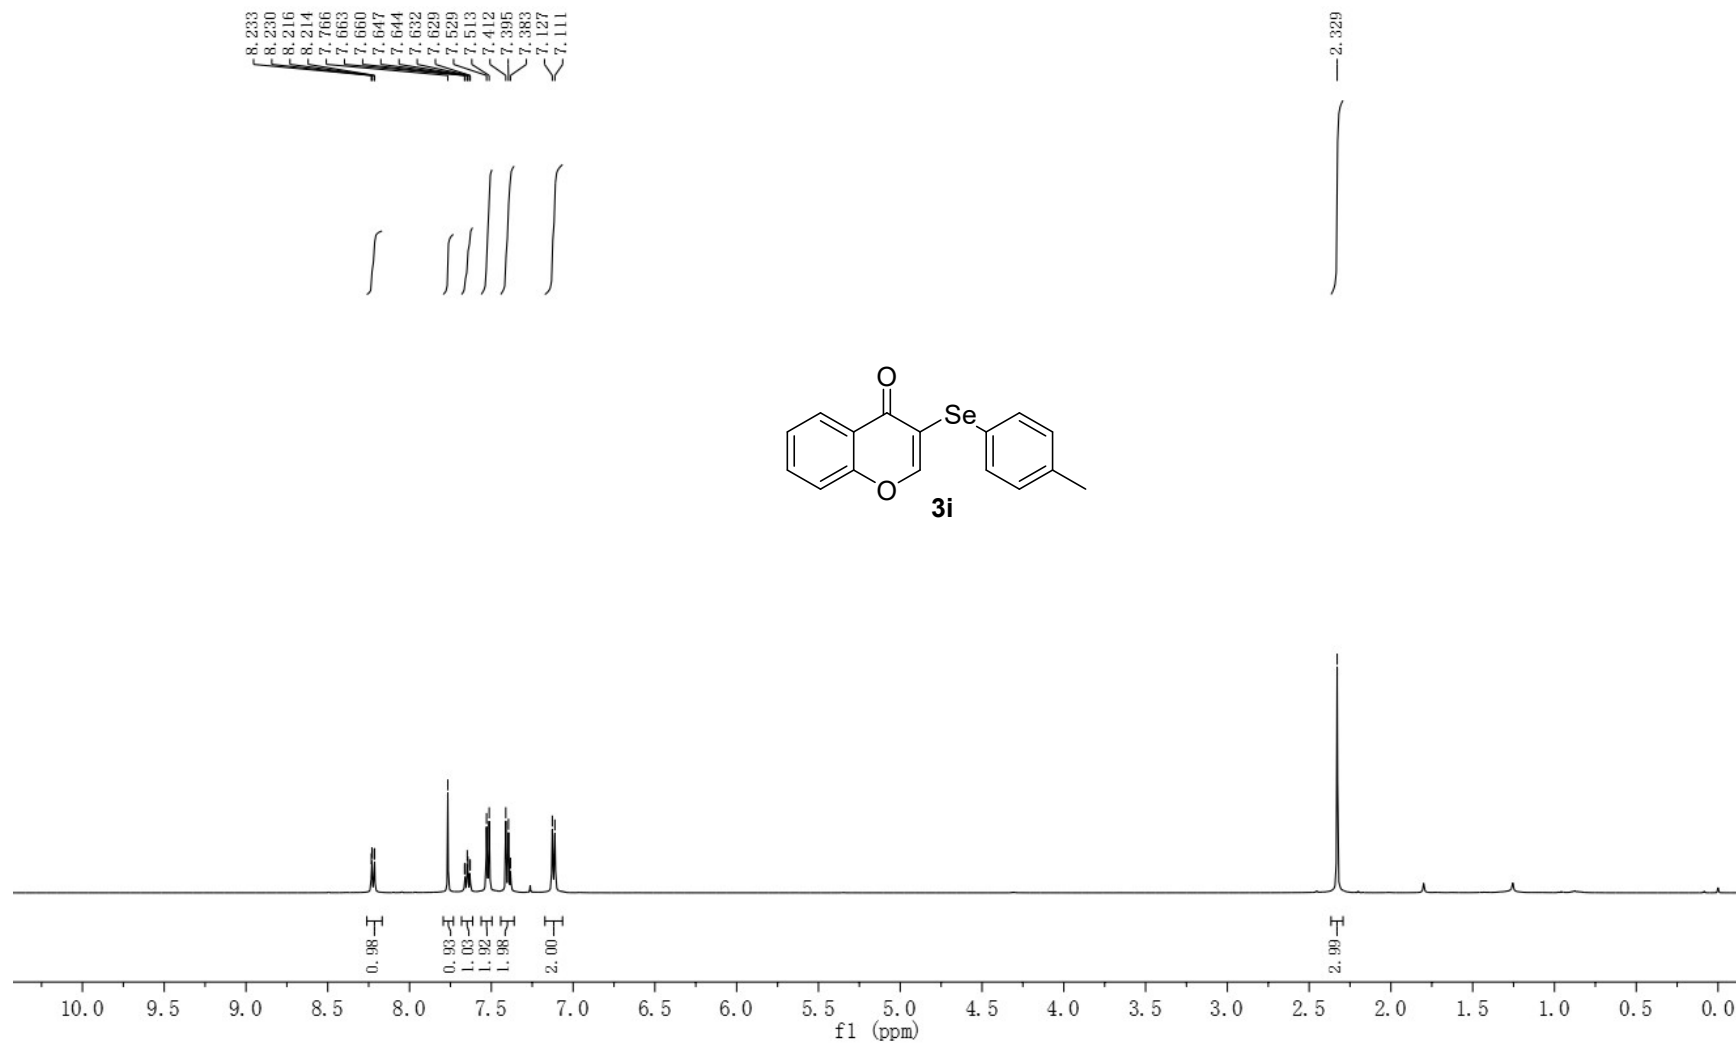



$^{13}\text{C}$  NMR (126 MHz,  $\text{CDCl}_3$ ) of **3i**

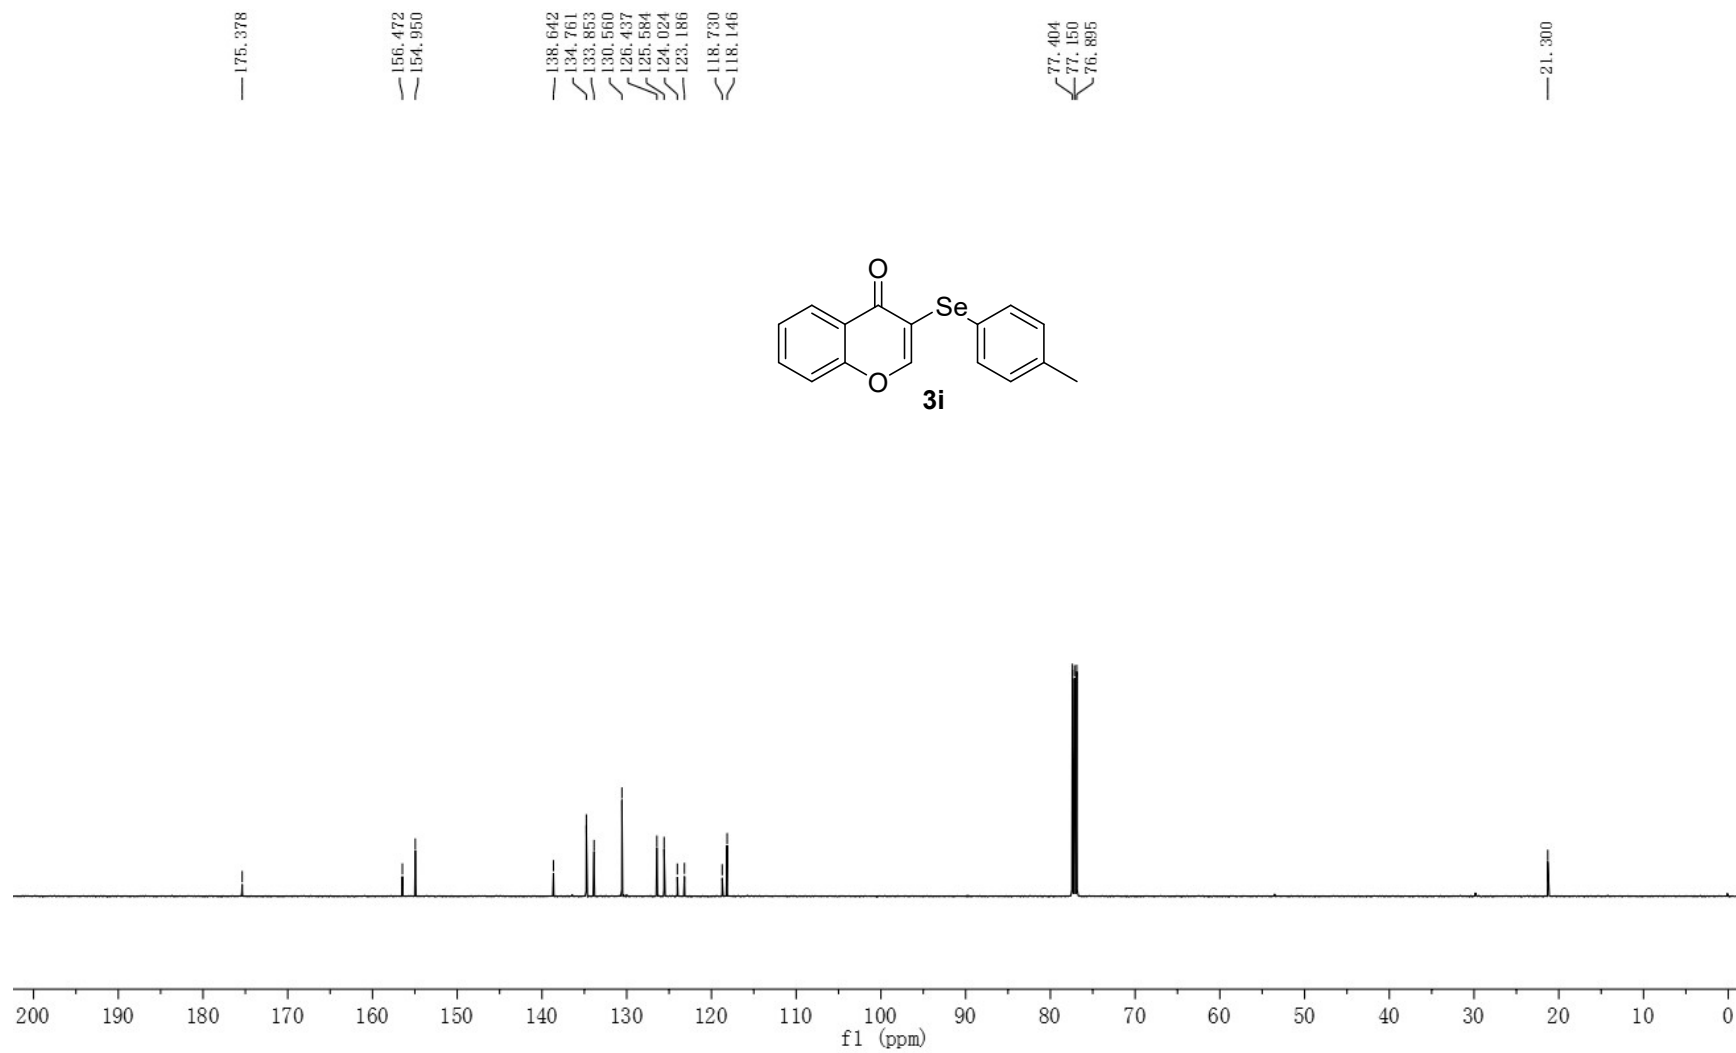

$^1\text{H}$  NMR (500 MHz,  $\text{CDCl}_3$ ) of **3j**

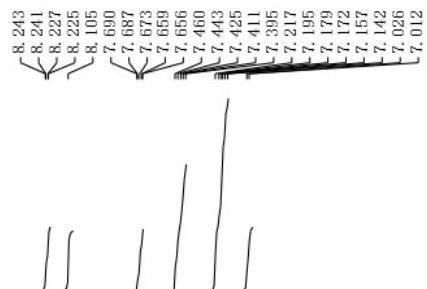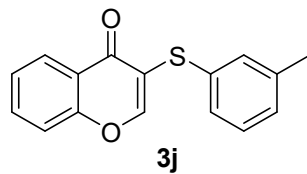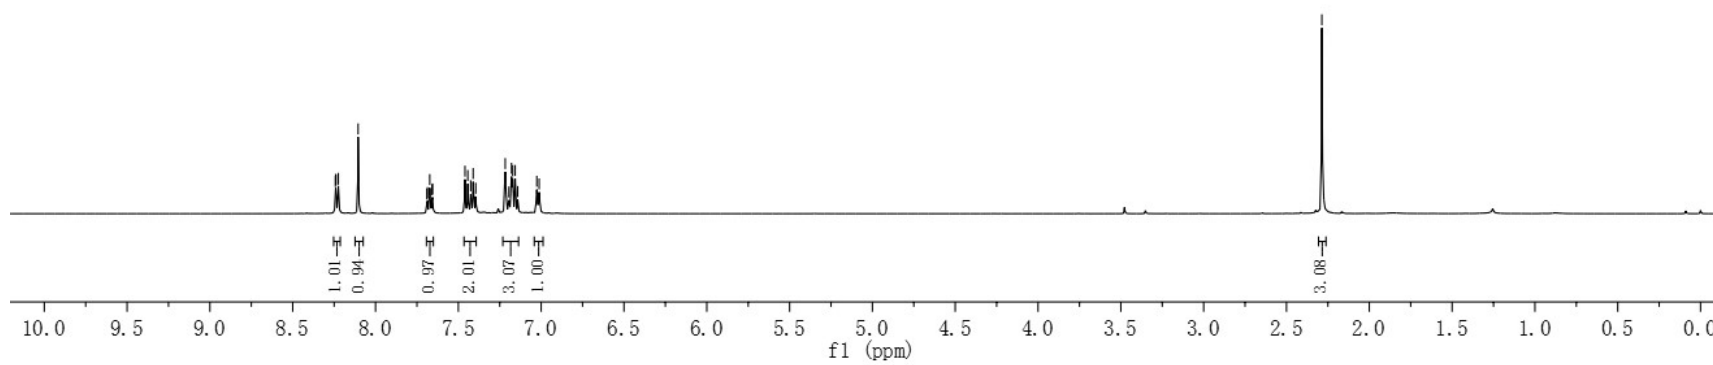

<sup>13</sup>C NMR (126 MHz, CDCl<sub>3</sub>) of **3j**

175.166

157.184  
156.446

139.160  
134.085  
133.690  
130.701  
129.141  
128.210  
127.161  
126.549  
125.776  
123.761  
120.324  
118.243

77.404  
77.150  
76.896

21.407

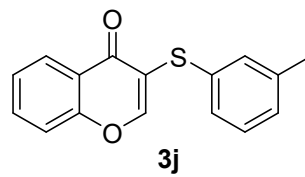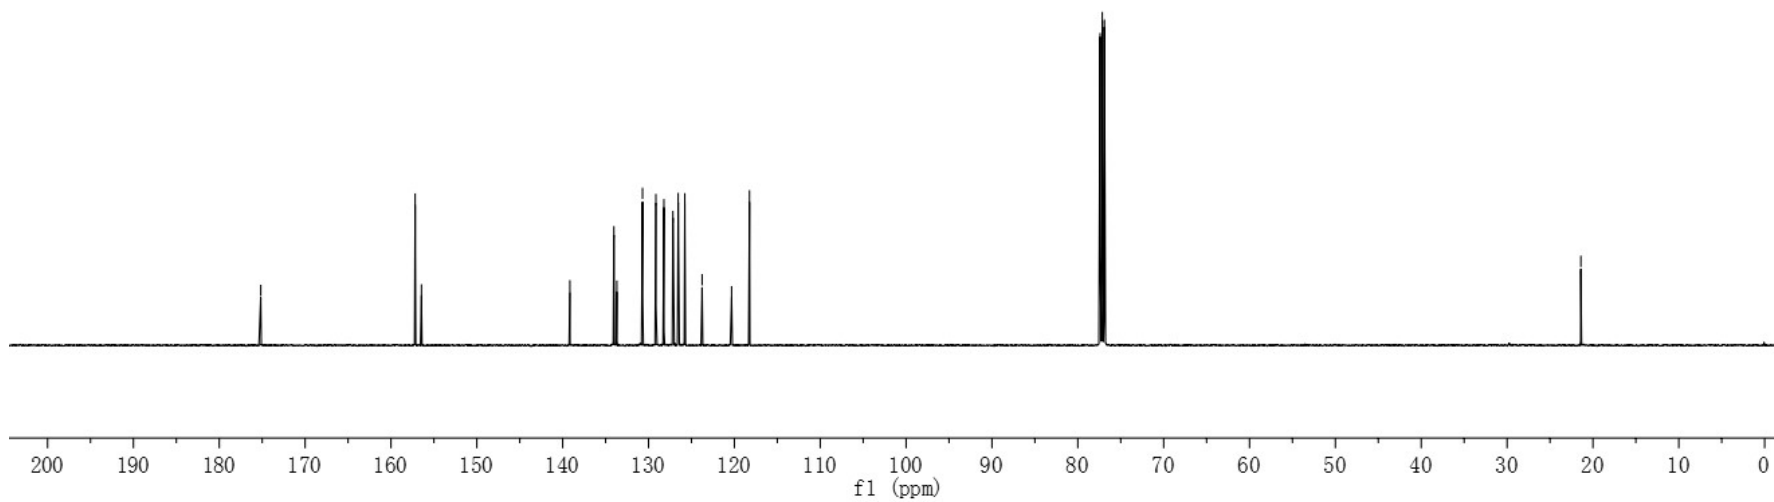

<sup>1</sup>H NMR (500 MHz, CDCl<sub>3</sub>) of **3k**

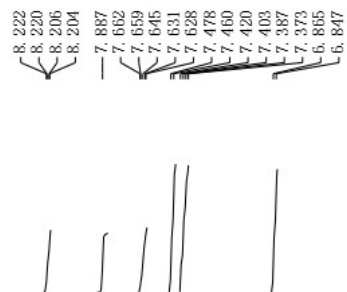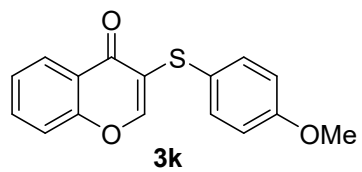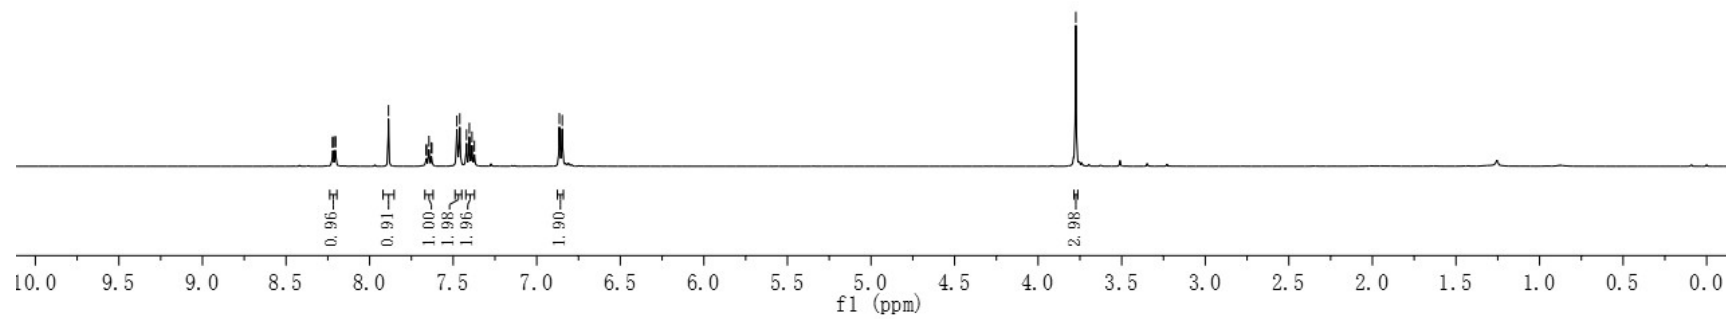

$^{13}\text{C}$  NMR (126 MHz,  $\text{CDCl}_3$ ) of **3k**

175.101

159.863  
156.262  
154.952

134.287  
133.838

126.247  
125.517  
123.405  
123.110  
122.564  
118.116  
115.034

77.405  
77.150  
76.895

55.379

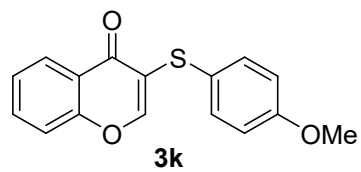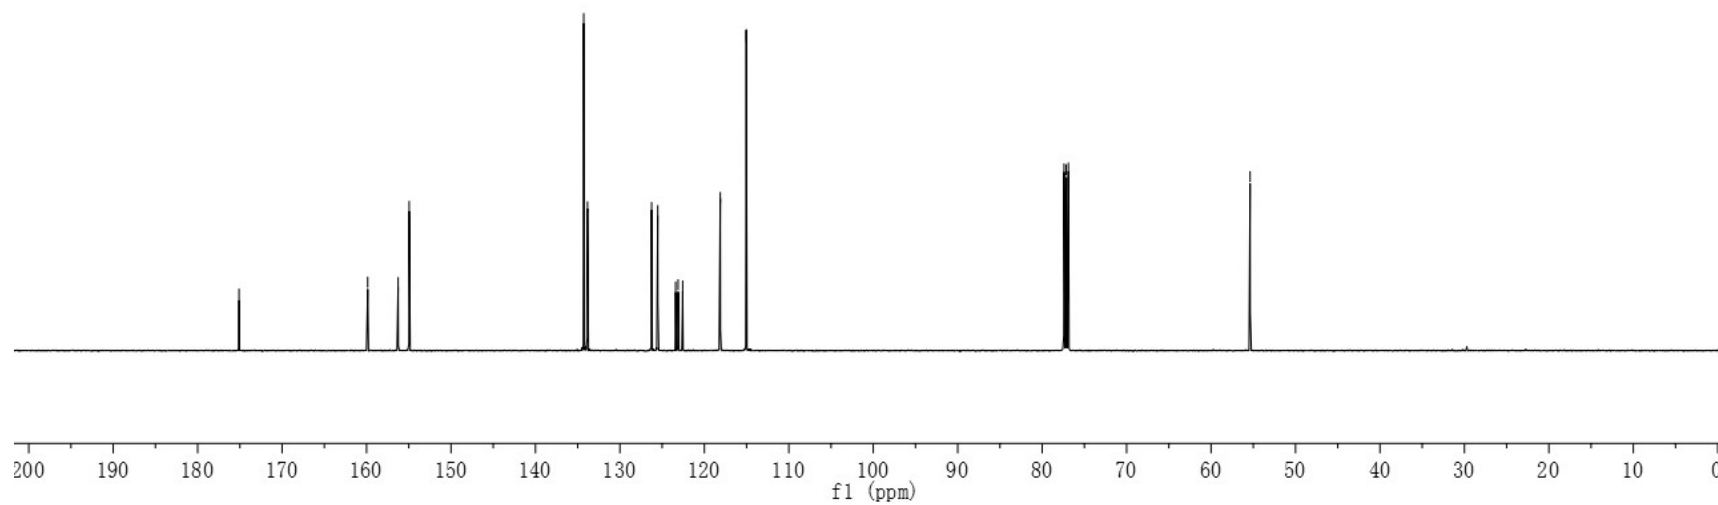

$^1\text{H}$  NMR (500 MHz,  $\text{CDCl}_3$ ) of **31**

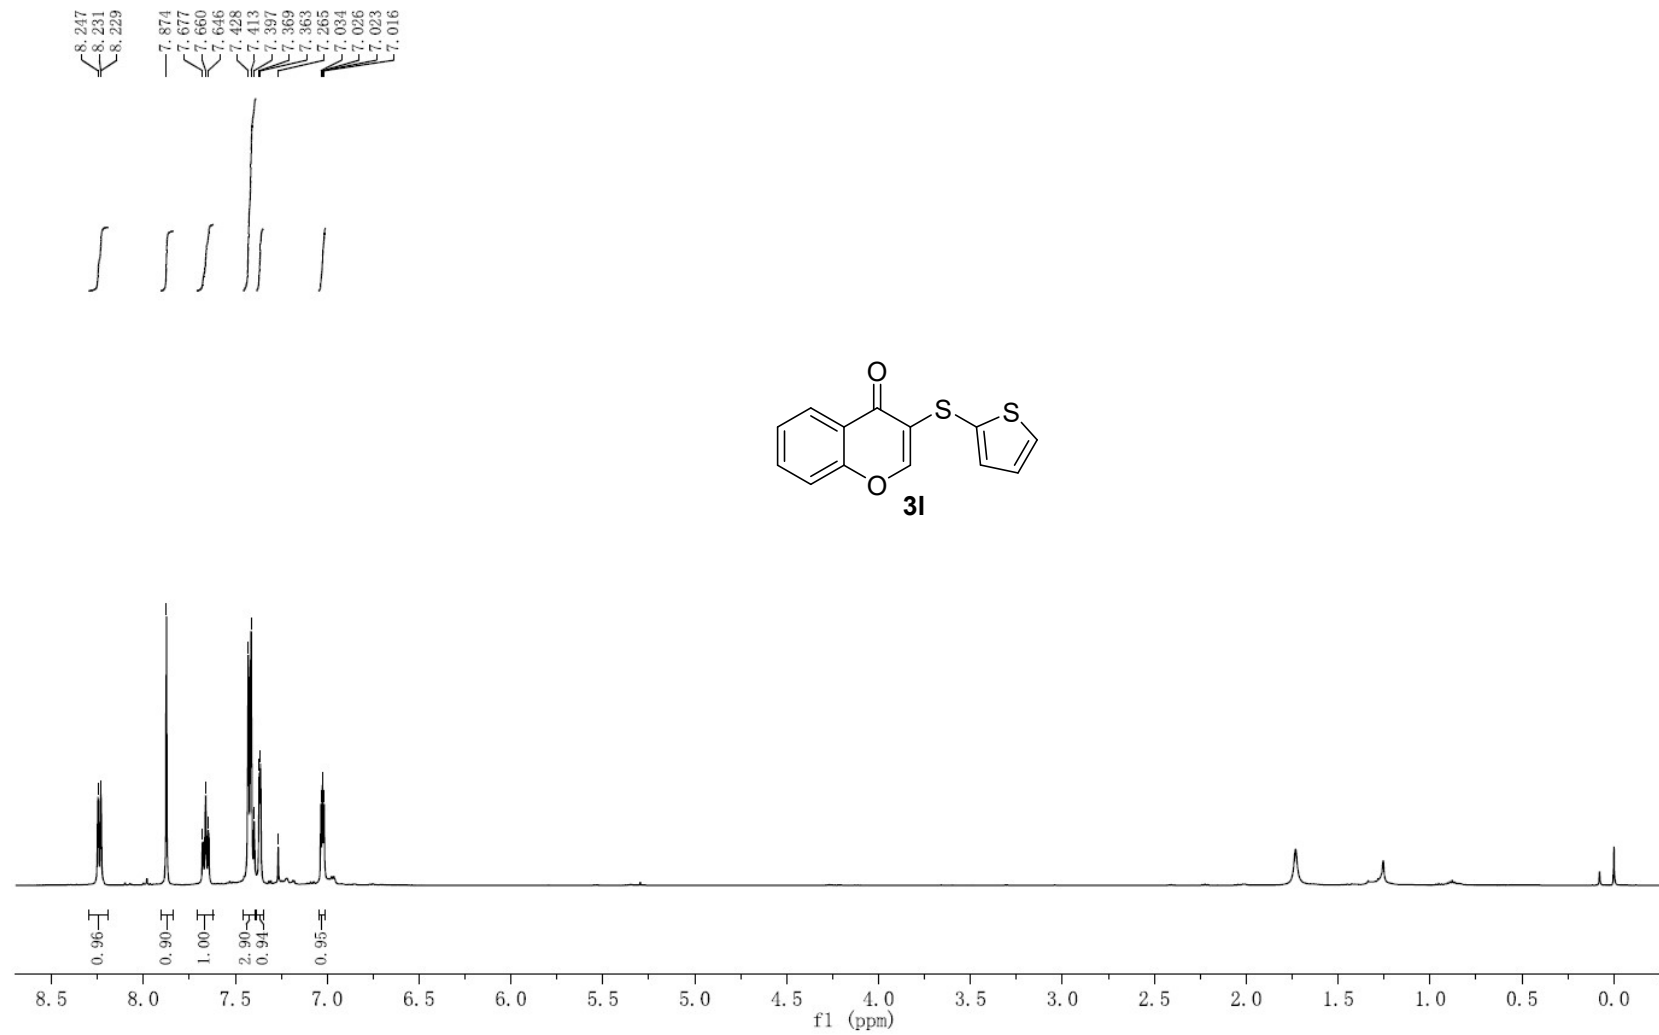

$^{13}\text{C}$  NMR (126 MHz,  $\text{CDCl}_3$ ) of **3I**

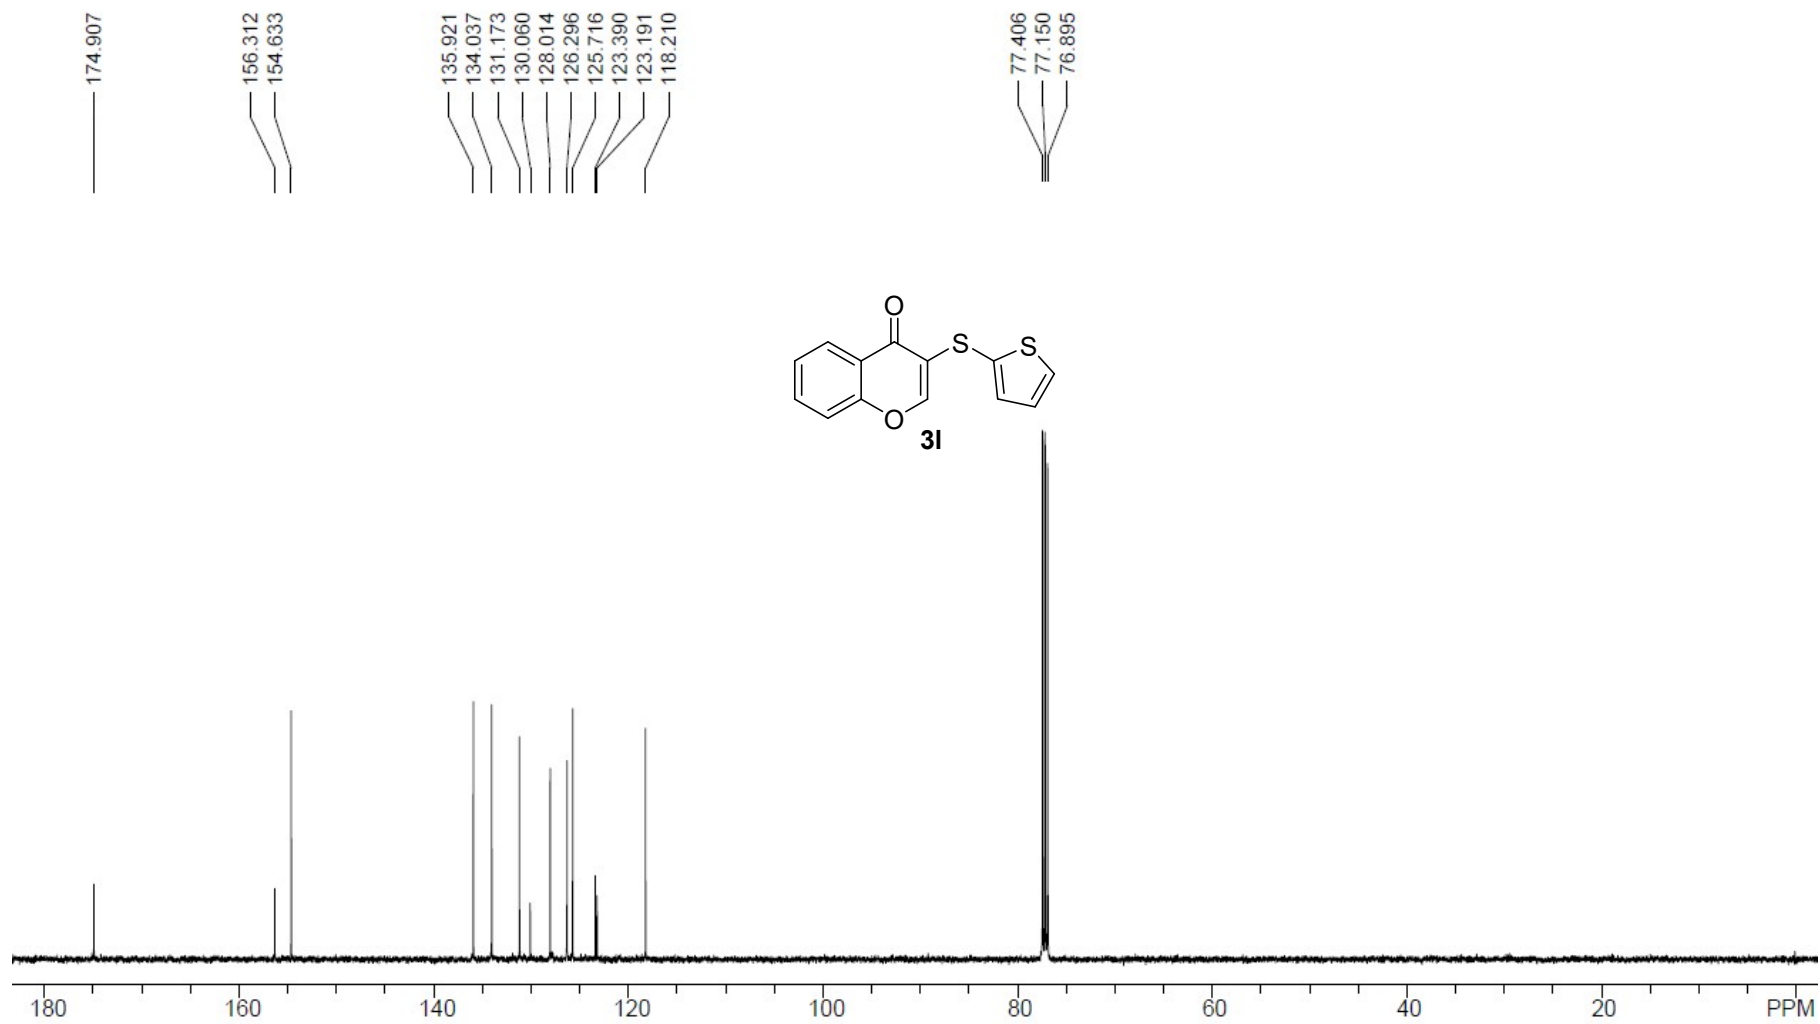

$^1\text{H}$  NMR (500 MHz,  $\text{CDCl}_3$ ) of **3m**

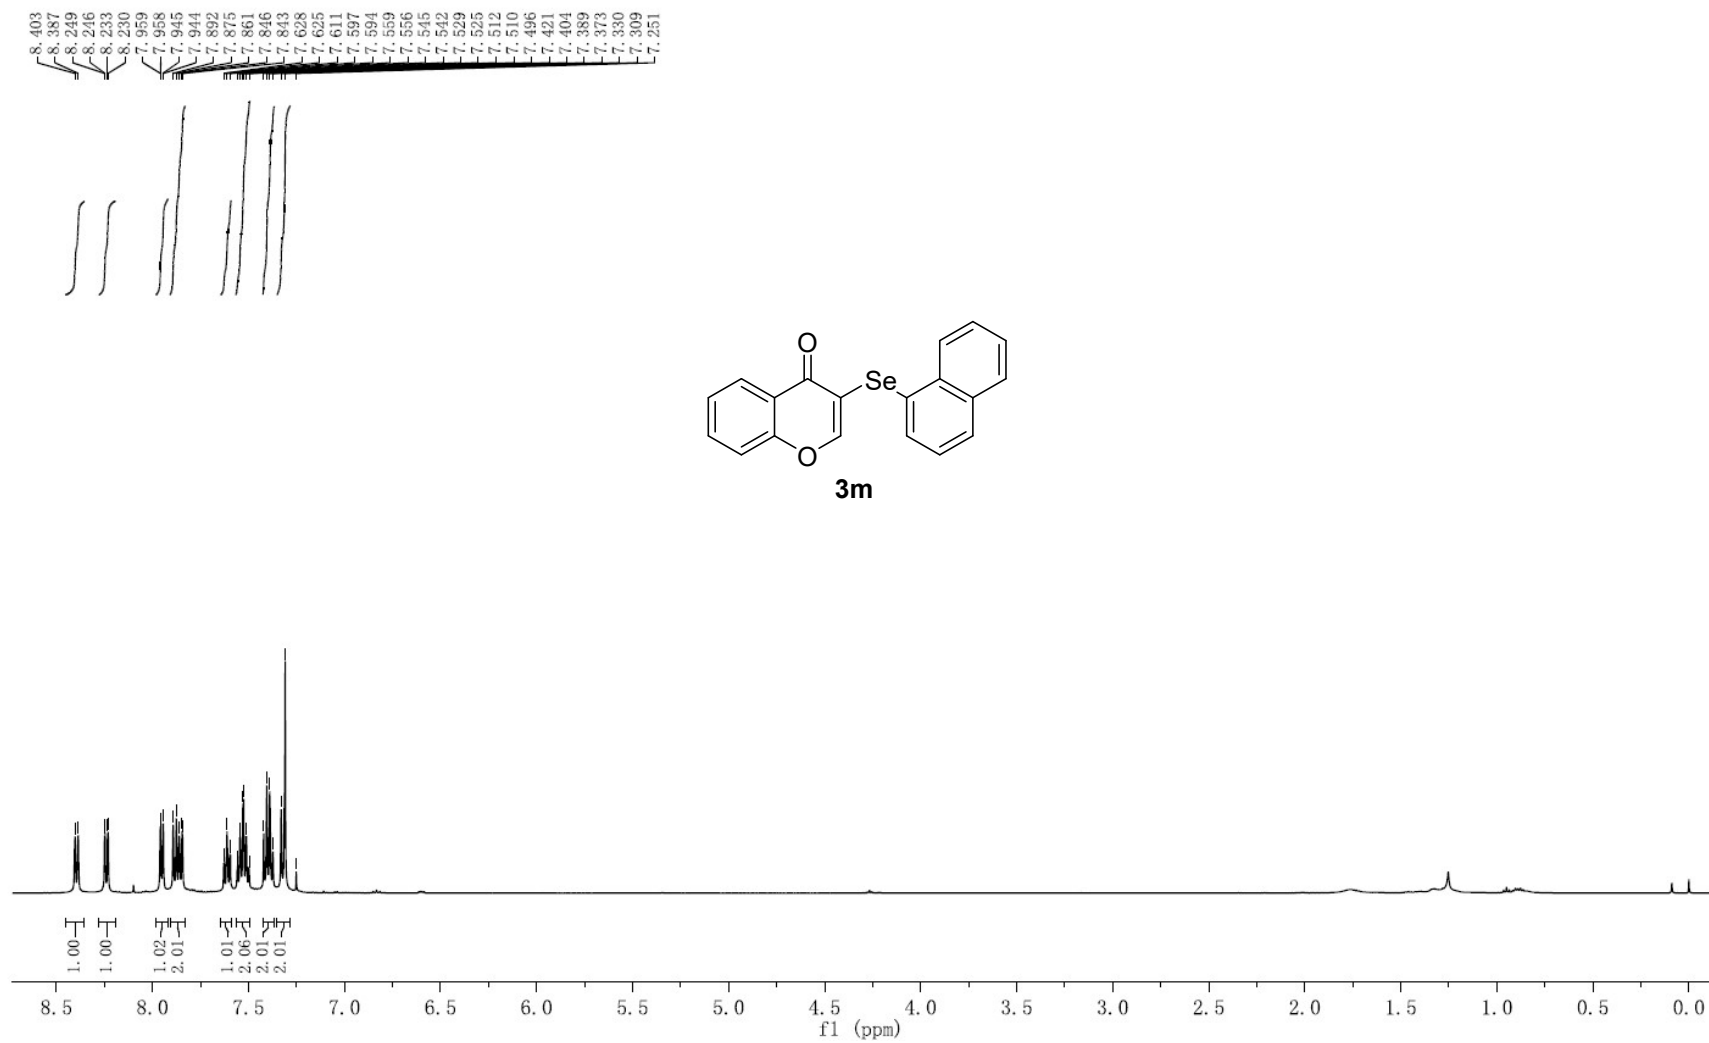



$^{13}\text{C}$  NMR (126 MHz,  $\text{CDCl}_3$ ) of **3m**

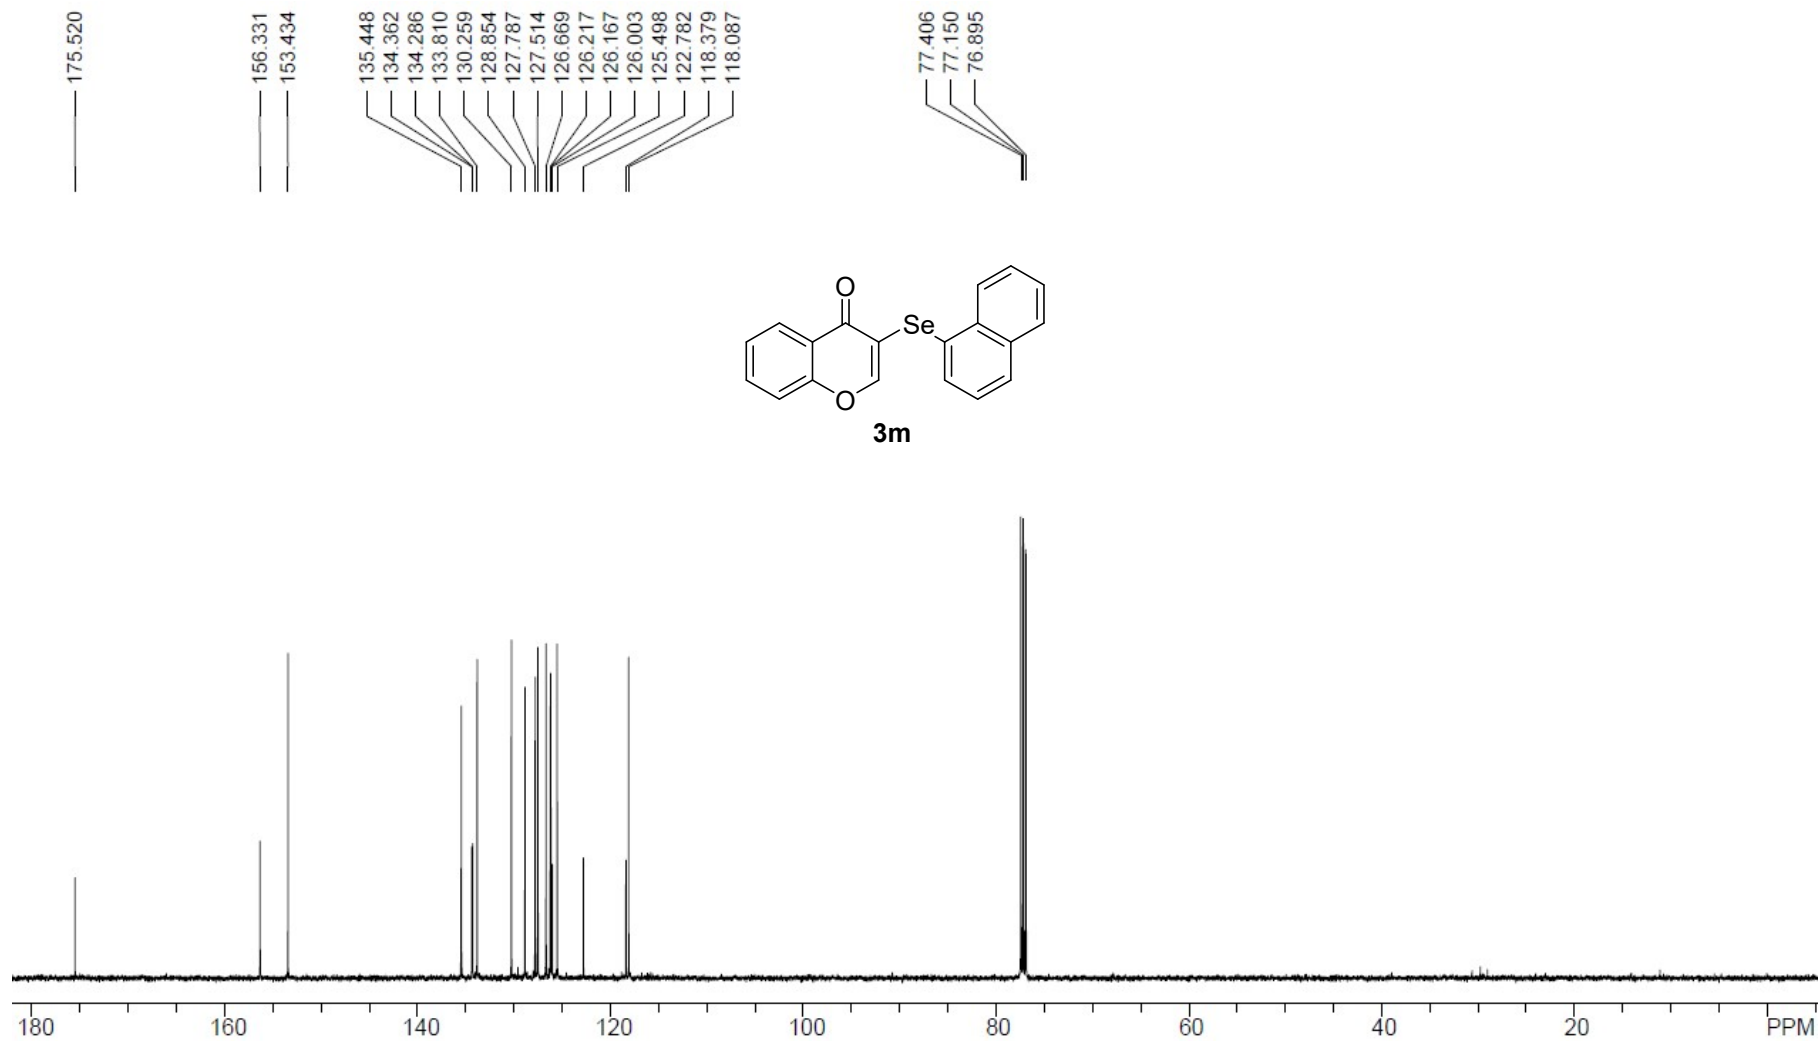

$^1\text{H}$  NMR (500 MHz,  $\text{CDCl}_3$ ) of **3n**

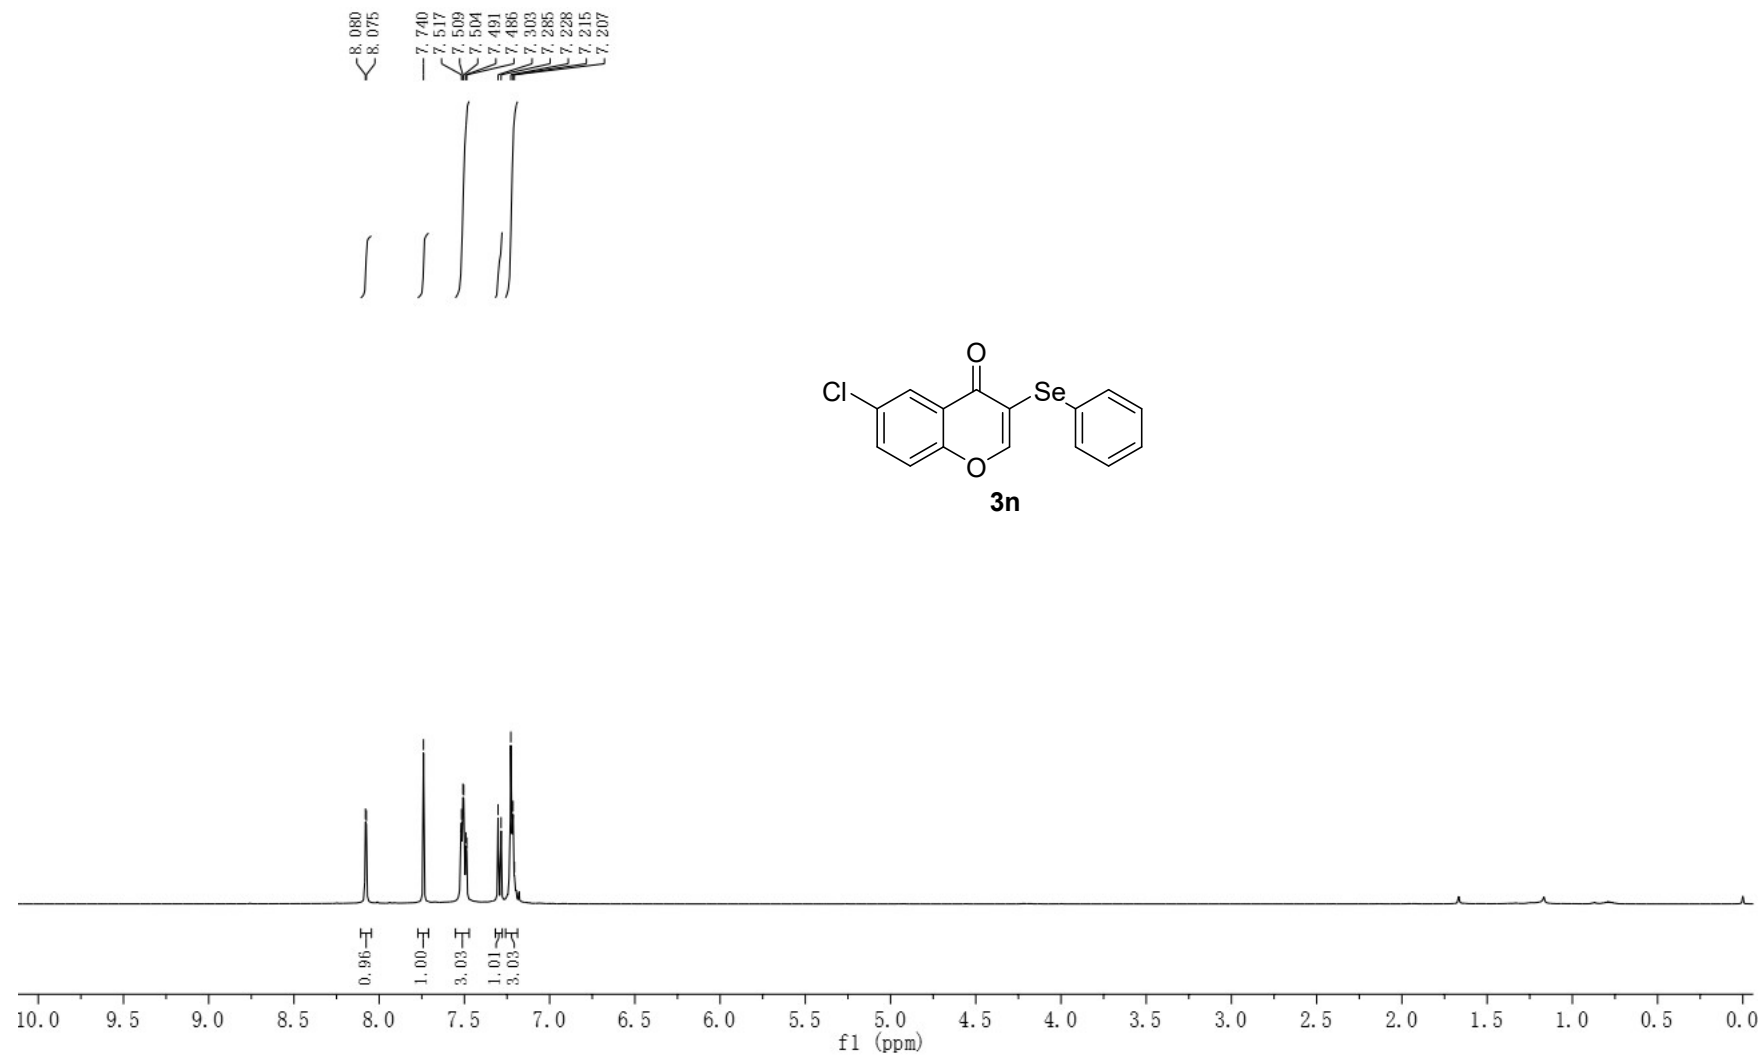

$^{13}\text{C}$  NMR (126 MHz,  $\text{CDCl}_3$ ) of **3n**

174.20

155.54  
154.77

134.26  
134.17  
131.58  
129.75  
128.49  
127.74  
126.76  
124.03  
119.95  
118.33

77.40  
77.15  
76.90

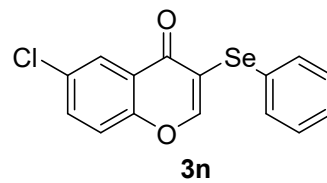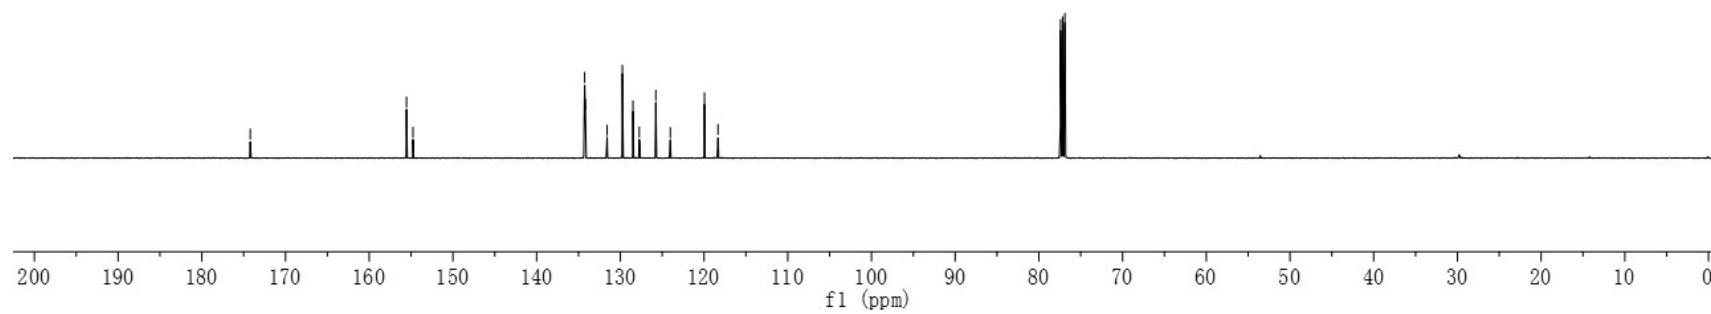

$^1\text{H}$  NMR (500 MHz,  $\text{CDCl}_3$ ) of **3o**

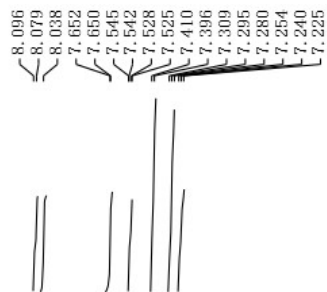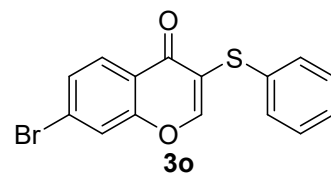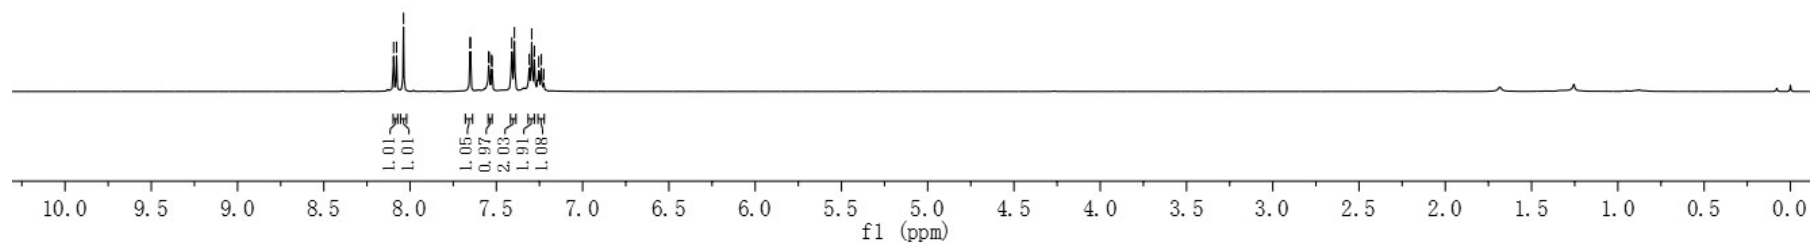

$^{13}\text{C}$  NMR (126 MHz,  $\text{CDCl}_3$ ) of **3o**

174.387

156.650  
156.376

133.397  
130.461  
129.415  
129.368  
128.375  
127.870  
127.538  
122.496  
121.317  
121.057

77.404  
77.150  
76.896

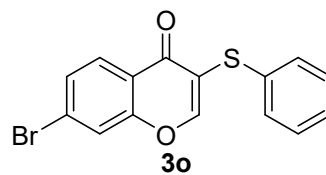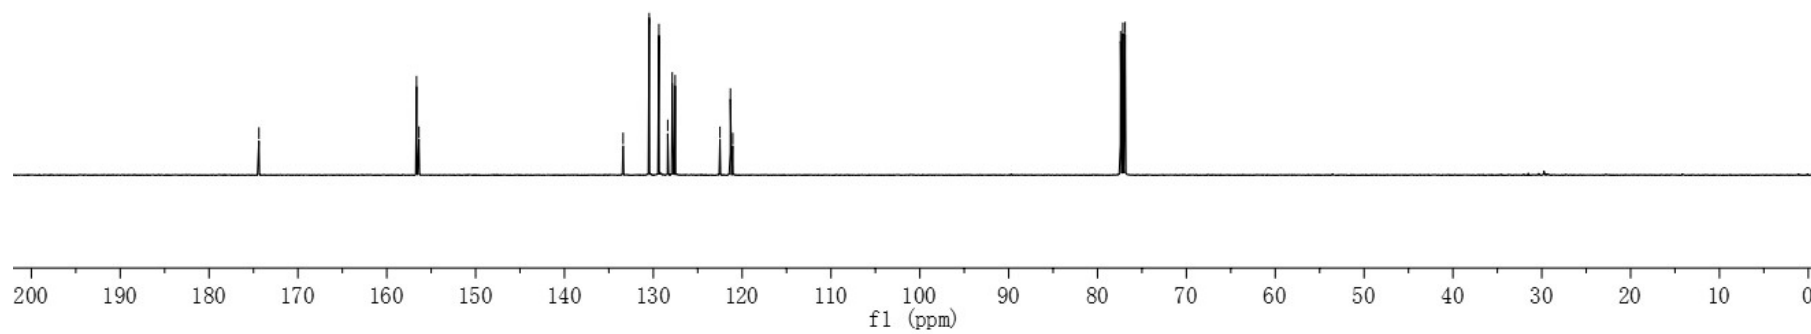

$^1\text{H}$  NMR (500 MHz,  $\text{CDCl}_3$ ) of **3p**

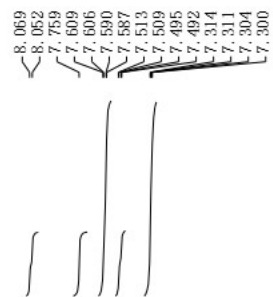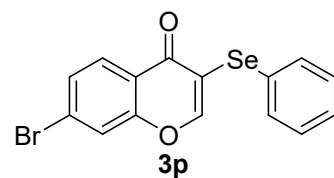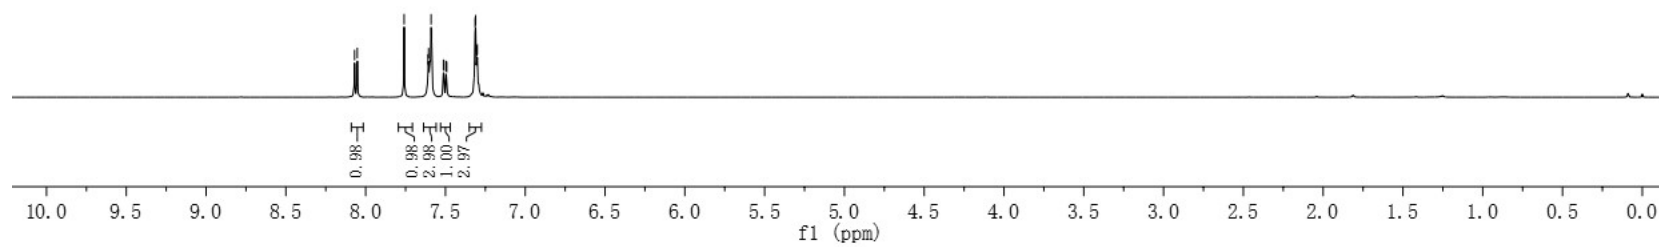

$^{13}\text{C}$  NMR (126 MHz,  $\text{CDCl}_3$ ) of **3p**

174.649

156.467  
155.117

134.368  
129.775  
129.323  
128.532  
128.252  
127.861  
127.636  
122.004  
121.259  
118.848

77.405  
77.150  
76.836

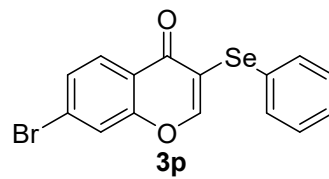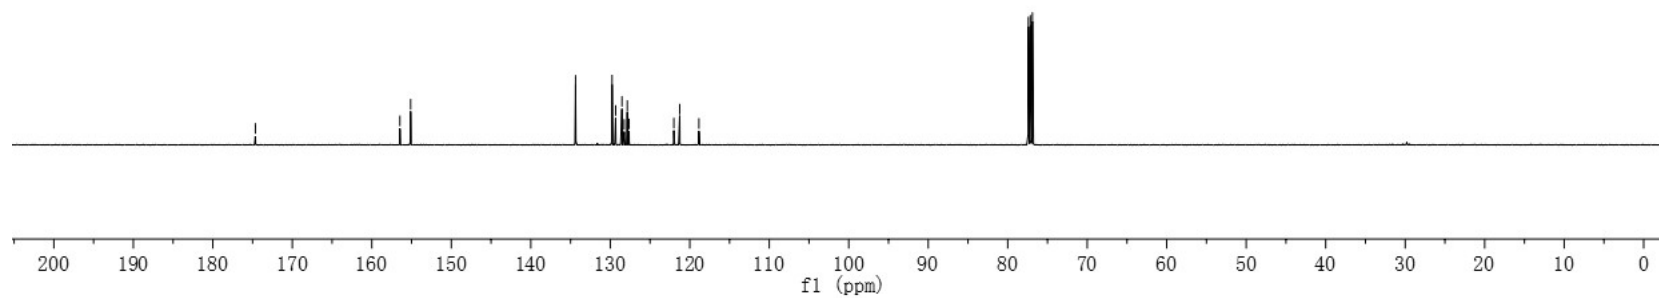

$^1\text{H}$  NMR (500 MHz,  $\text{CDCl}_3$ ) of **3q**

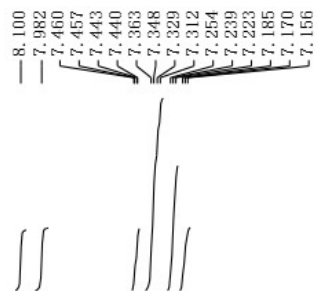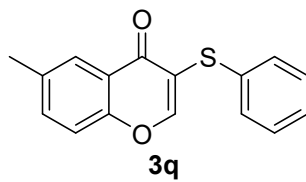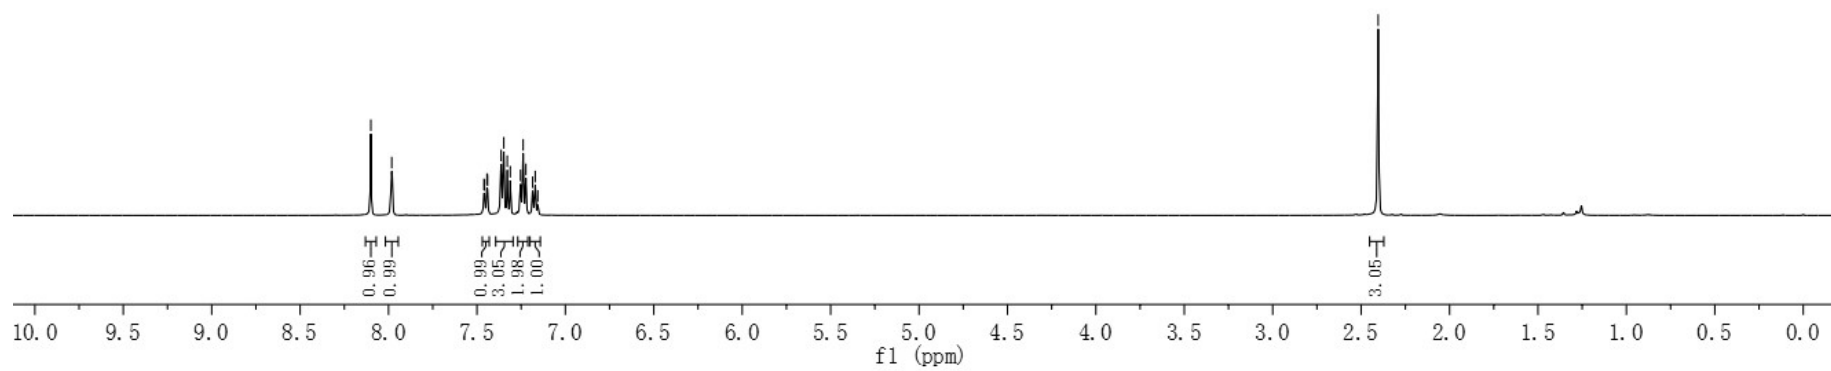



<sup>13</sup>C NMR (126 MHz, CDCl<sub>3</sub>) of **3q**

175.150

157.535  
154.646

135.852  
135.263  
134.343  
129.657  
129.166  
126.993  
125.693  
123.381  
119.480  
117.949

77.404  
77.150  
76.895

20.966

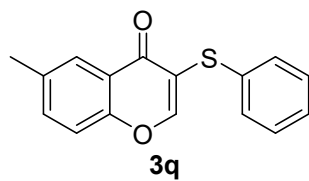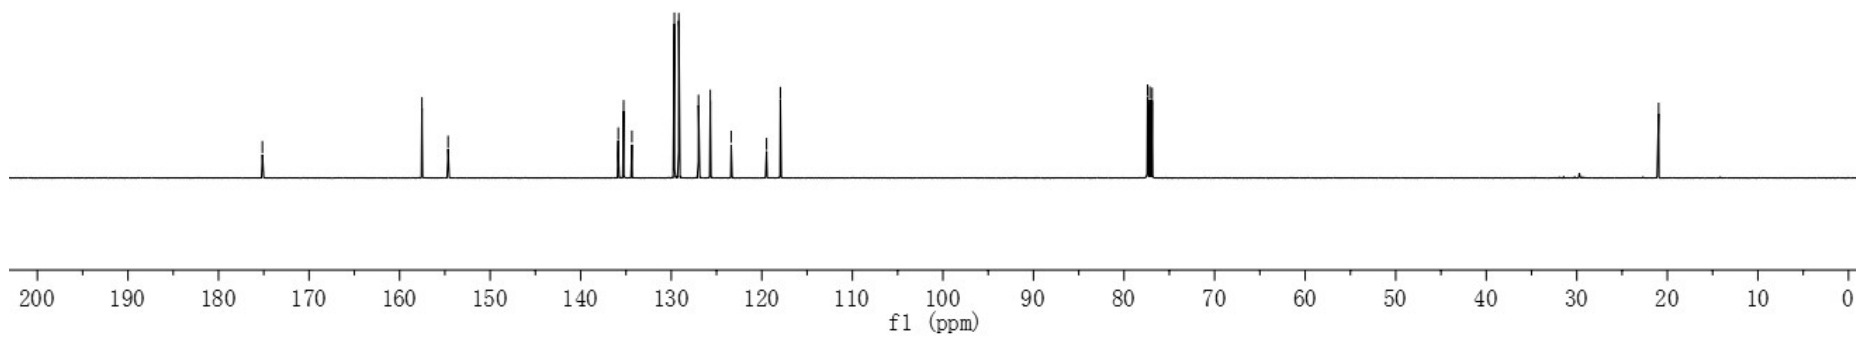

$^1\text{H}$  NMR (500 MHz,  $\text{CDCl}_3$ ) of **3r**

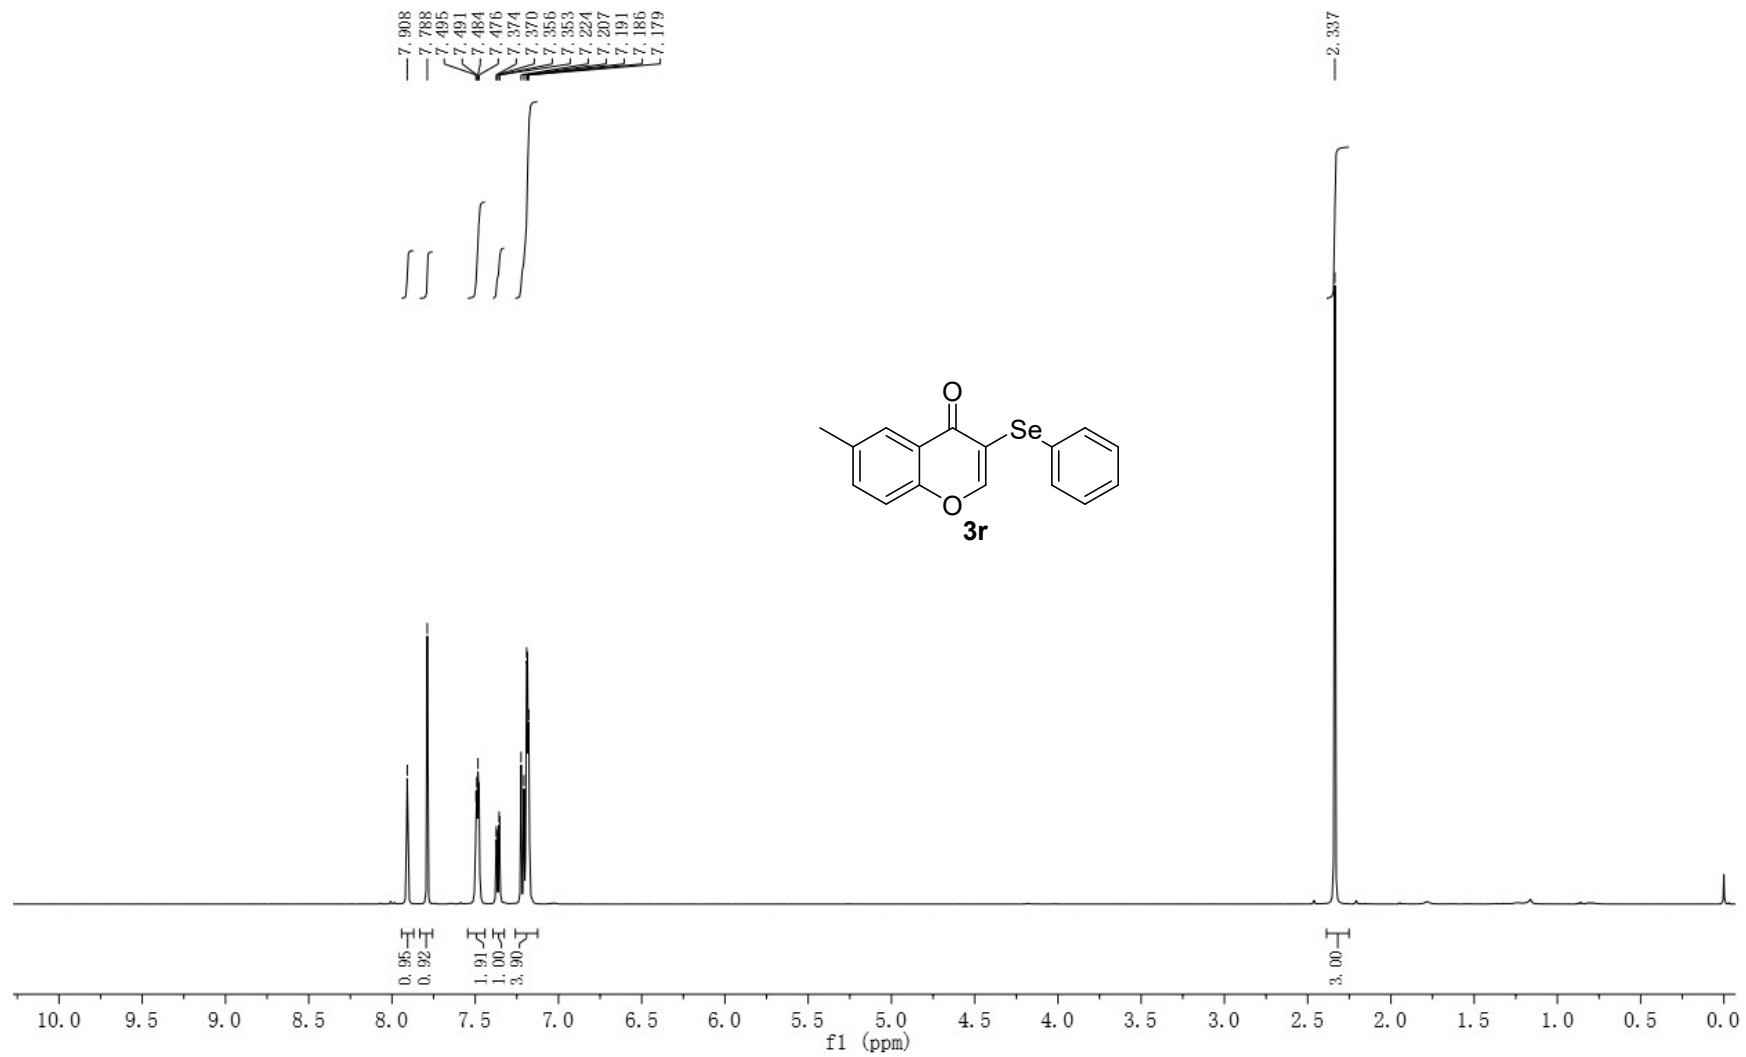

$^{13}\text{C}$  NMR (126 MHz,  $\text{CDCl}_3$ ) of **3r**

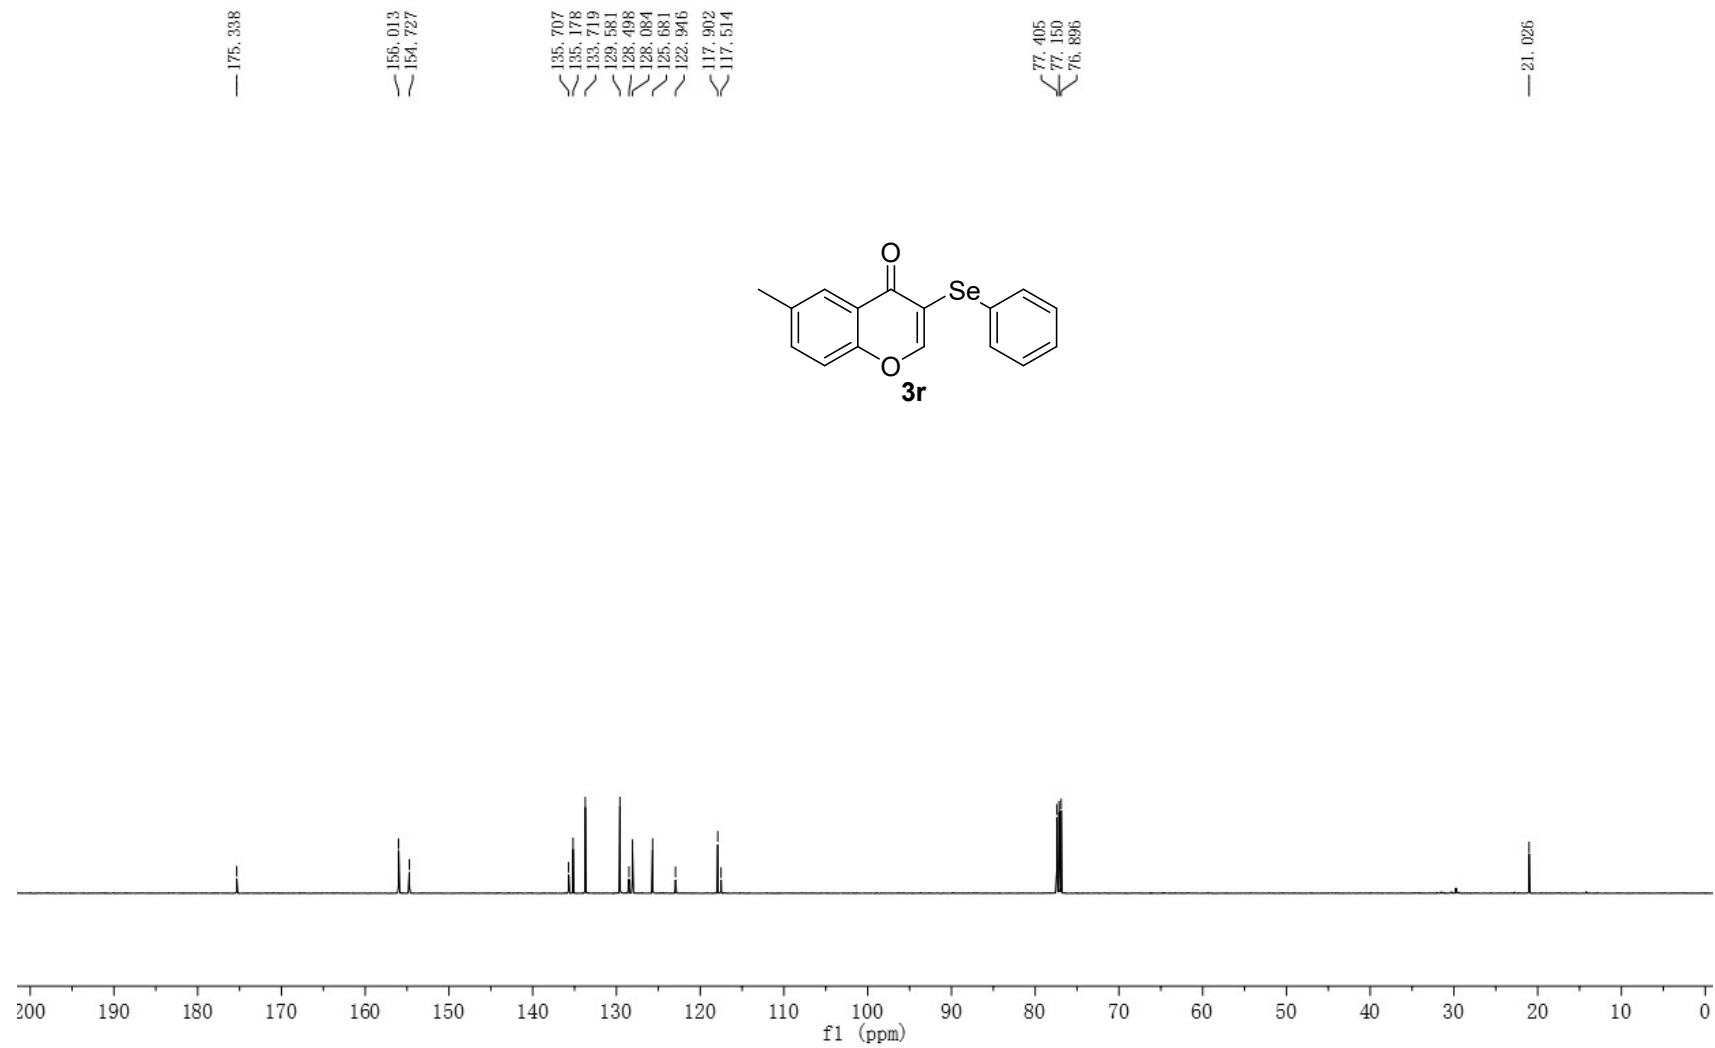

$^1\text{H}$  NMR (500 MHz,  $\text{CDCl}_3$ ) of **3s**

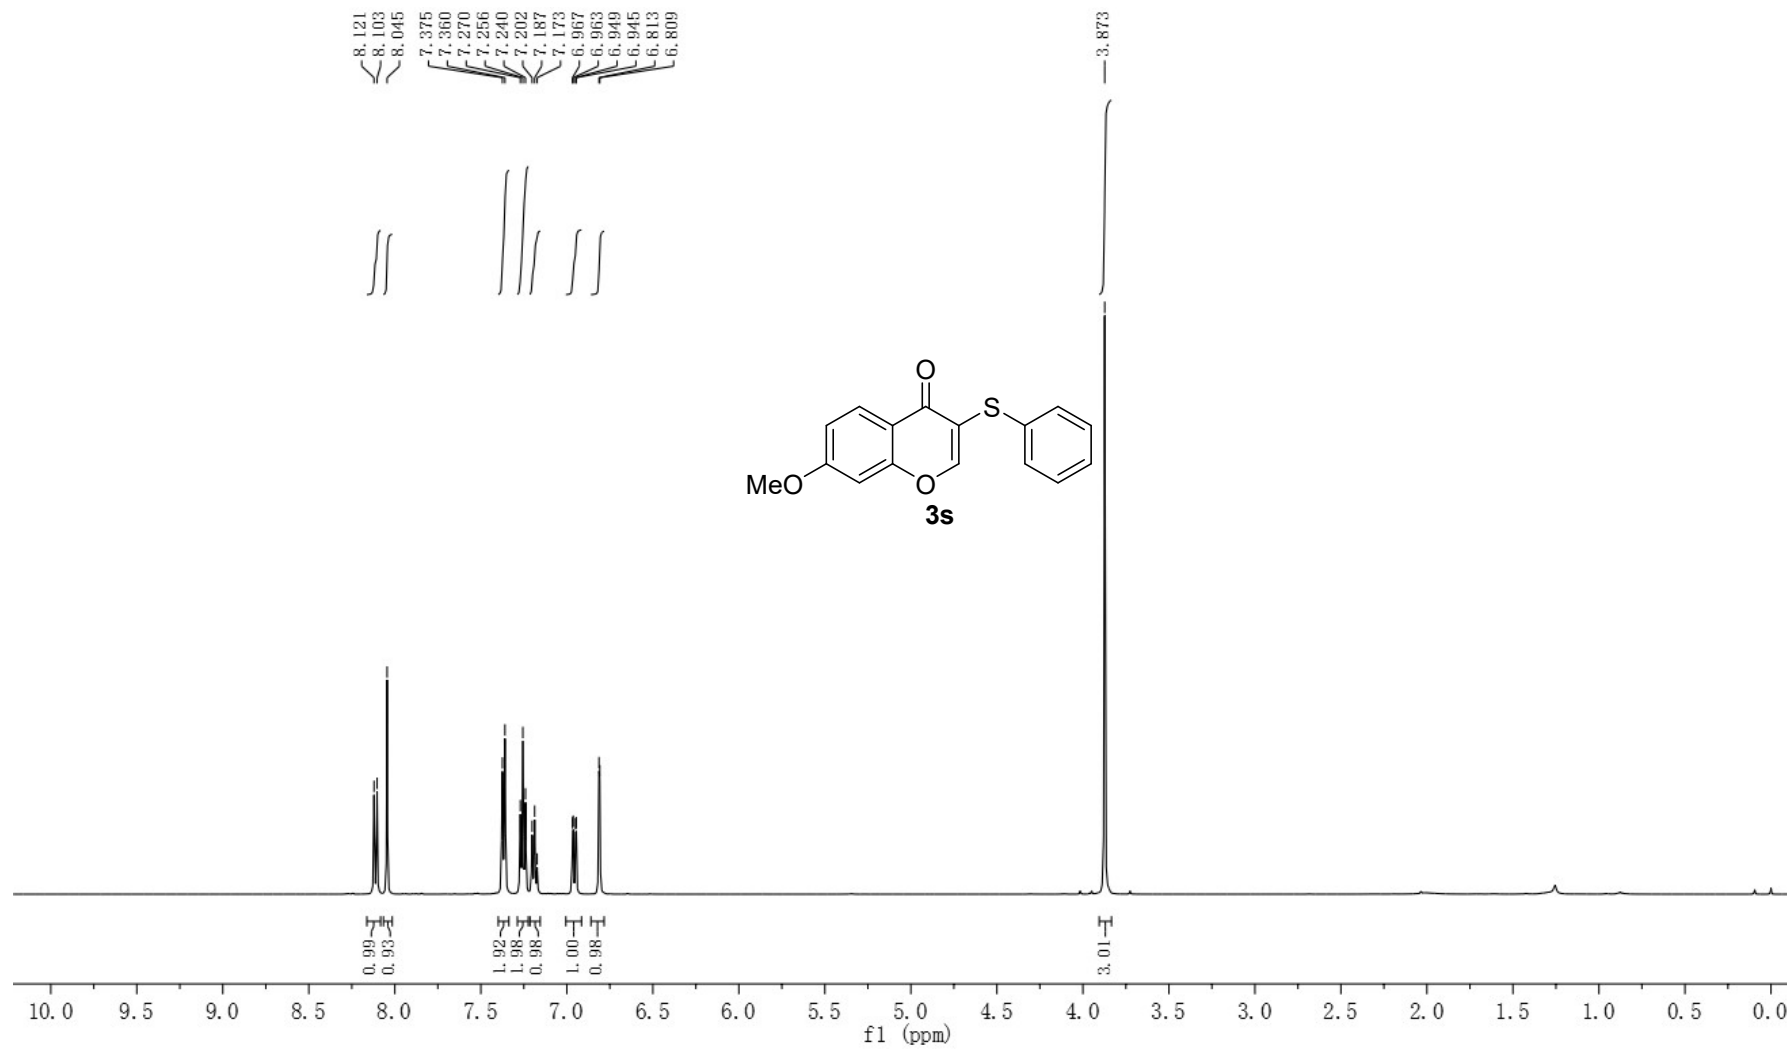

$^{13}\text{C}$  NMR (126 MHz,  $\text{CDCl}_3$ ) of **3s**

174.435  
164.384  
158.217  
157.046  
134.370  
129.792  
129.228  
127.900  
127.069  
119.840  
117.643  
115.066  
100.415  
77.404  
77.150  
76.896  
55.982

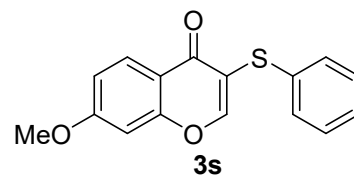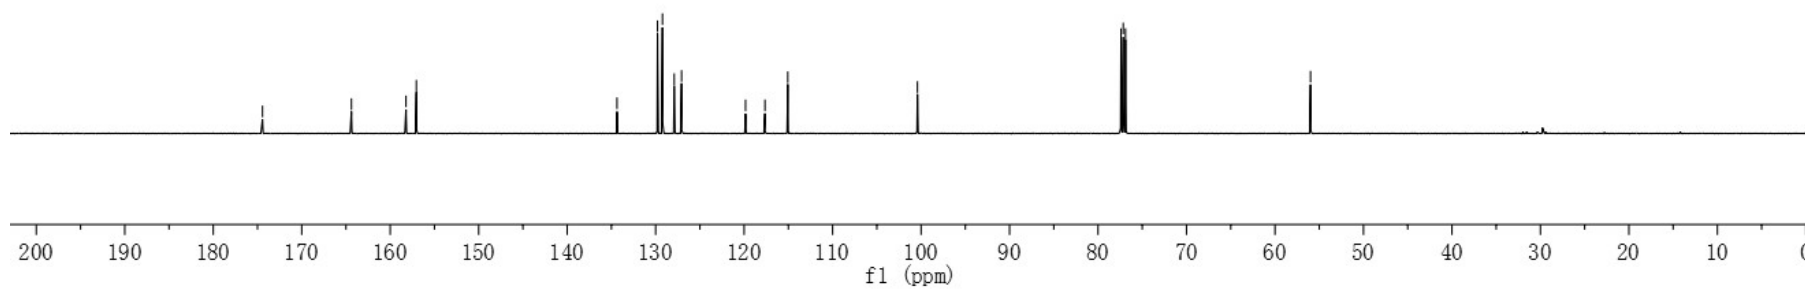

<sup>1</sup>H NMR (500 MHz, CDCl<sub>3</sub>) of **5a**

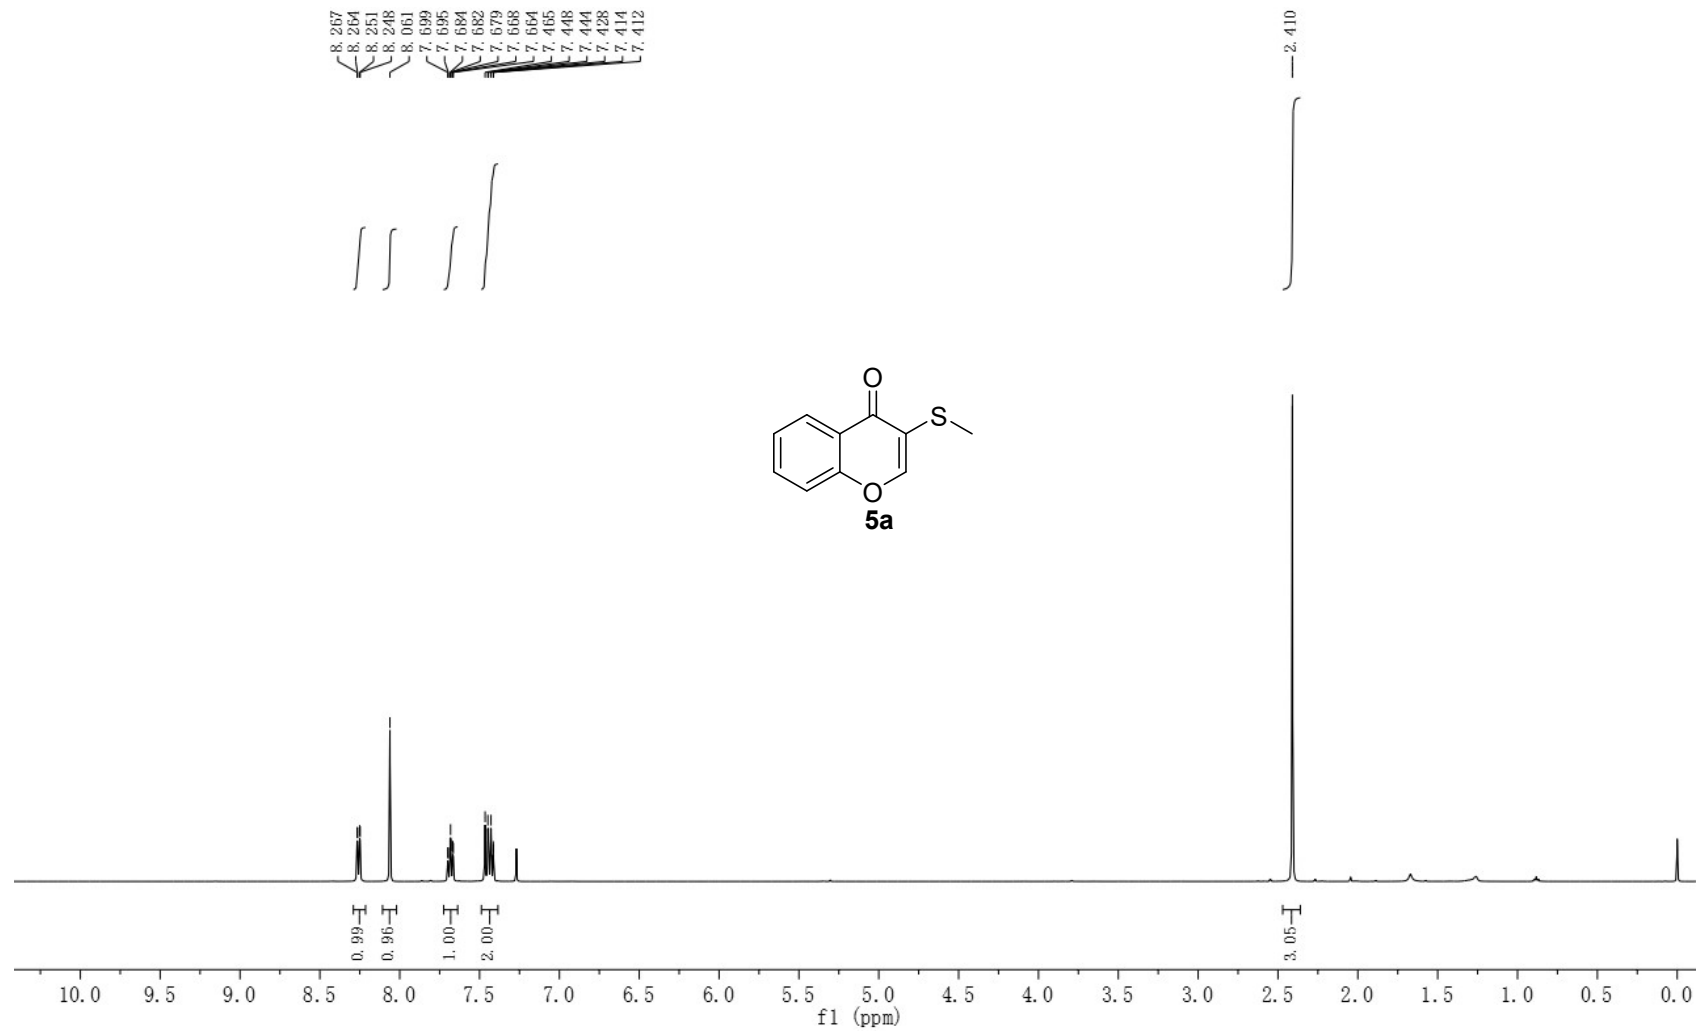

$^{13}\text{C}$  NMR (126 MHz,  $\text{CDCl}_3$ ) of **5a**

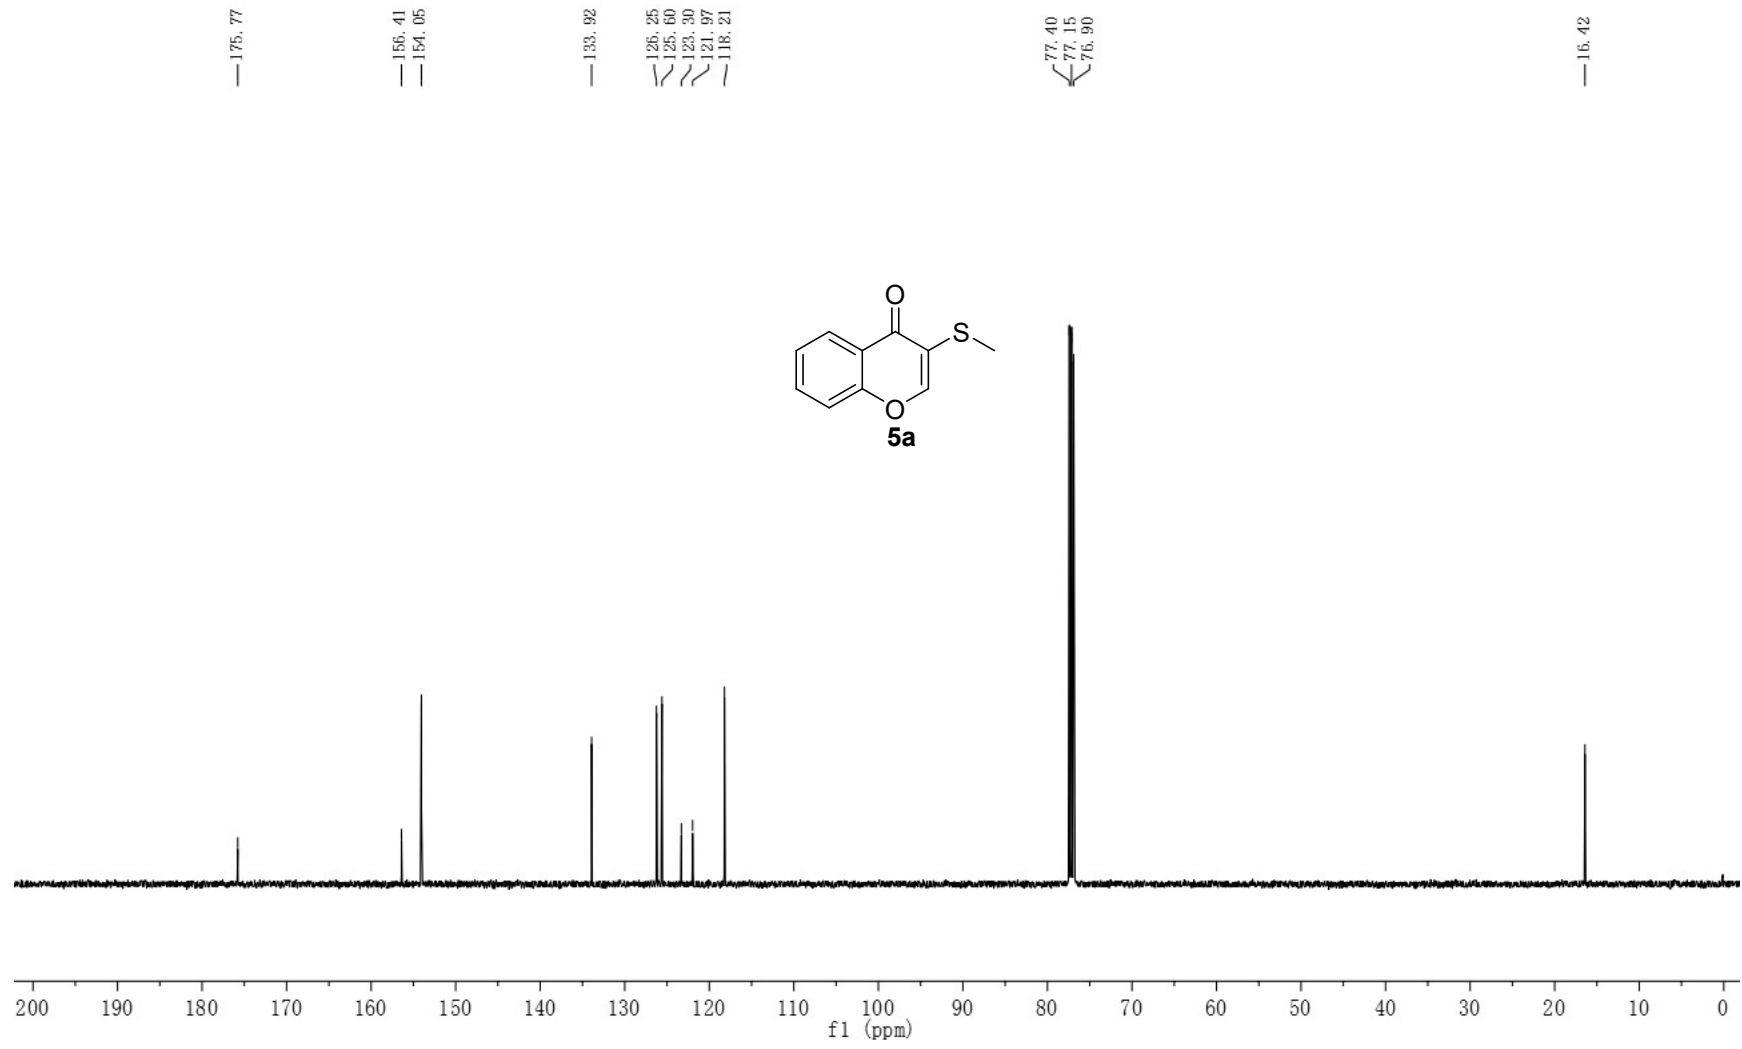

<sup>1</sup>H NMR (500 MHz, CDCl<sub>3</sub>) of **5b**

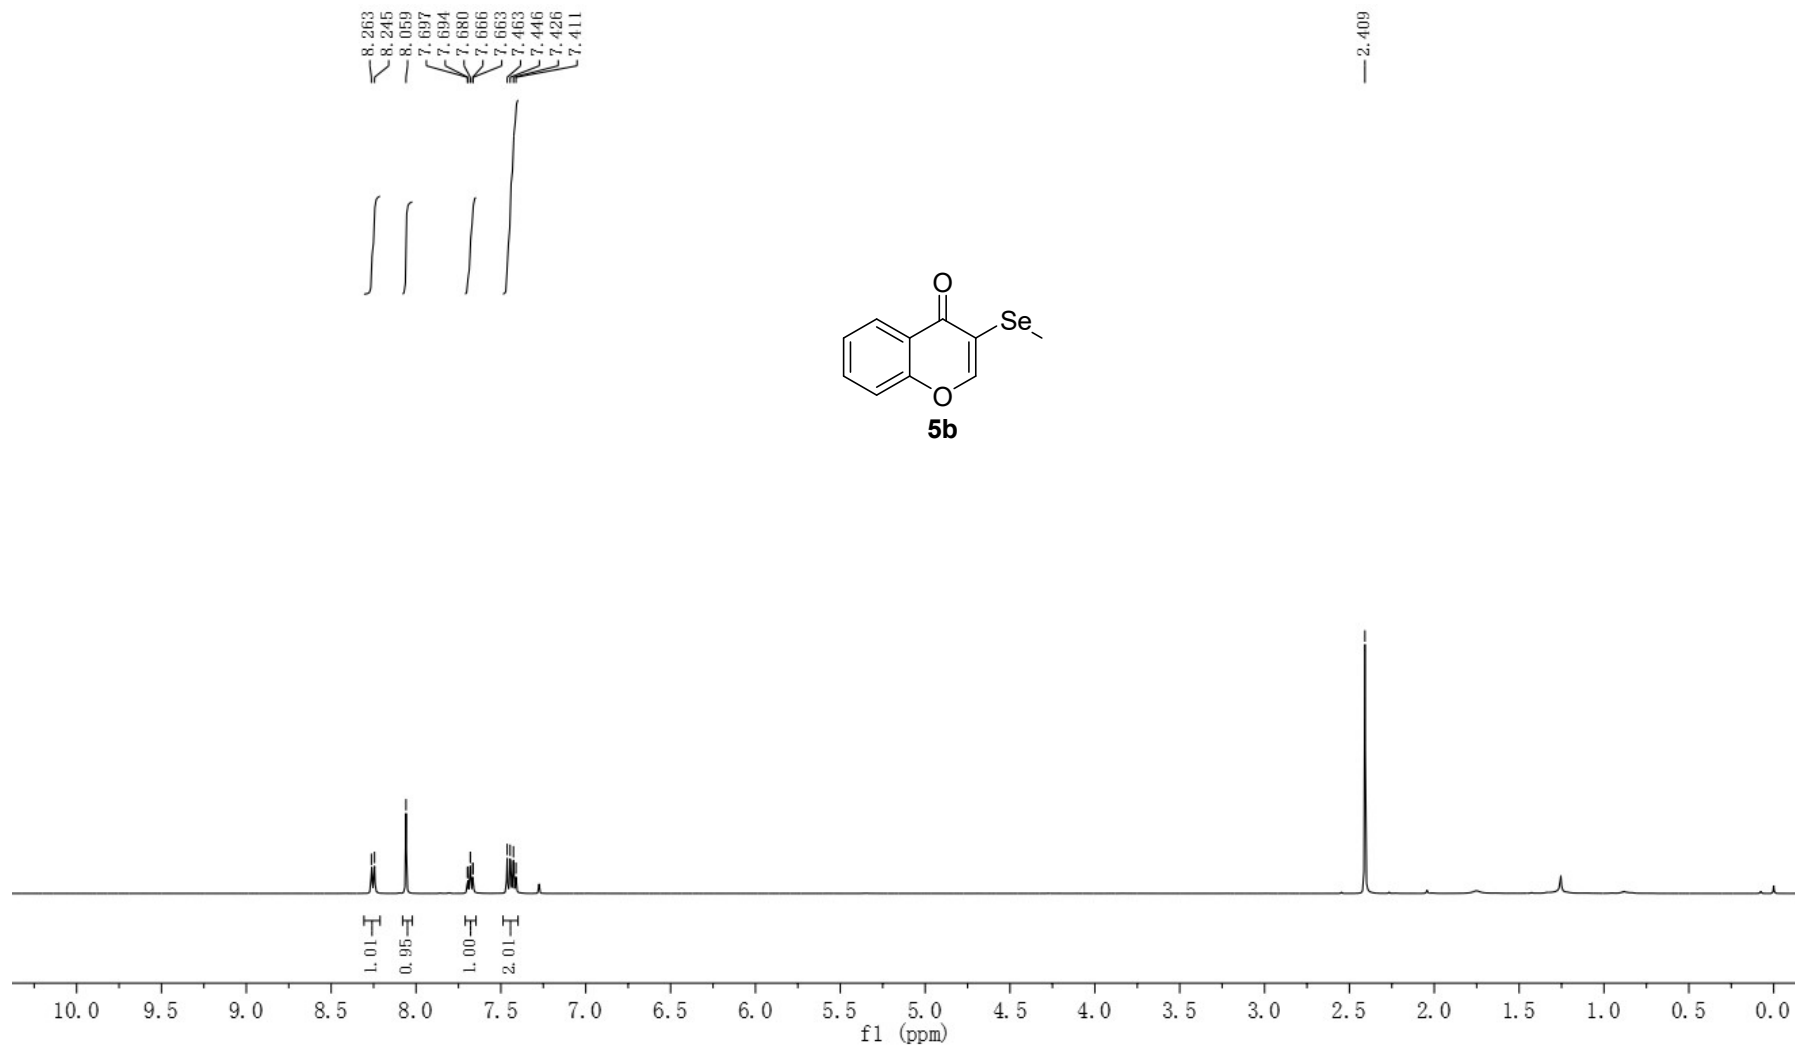



$^{13}\text{C}$  NMR (126 MHz,  $\text{CDCl}_3$ ) of **5b**

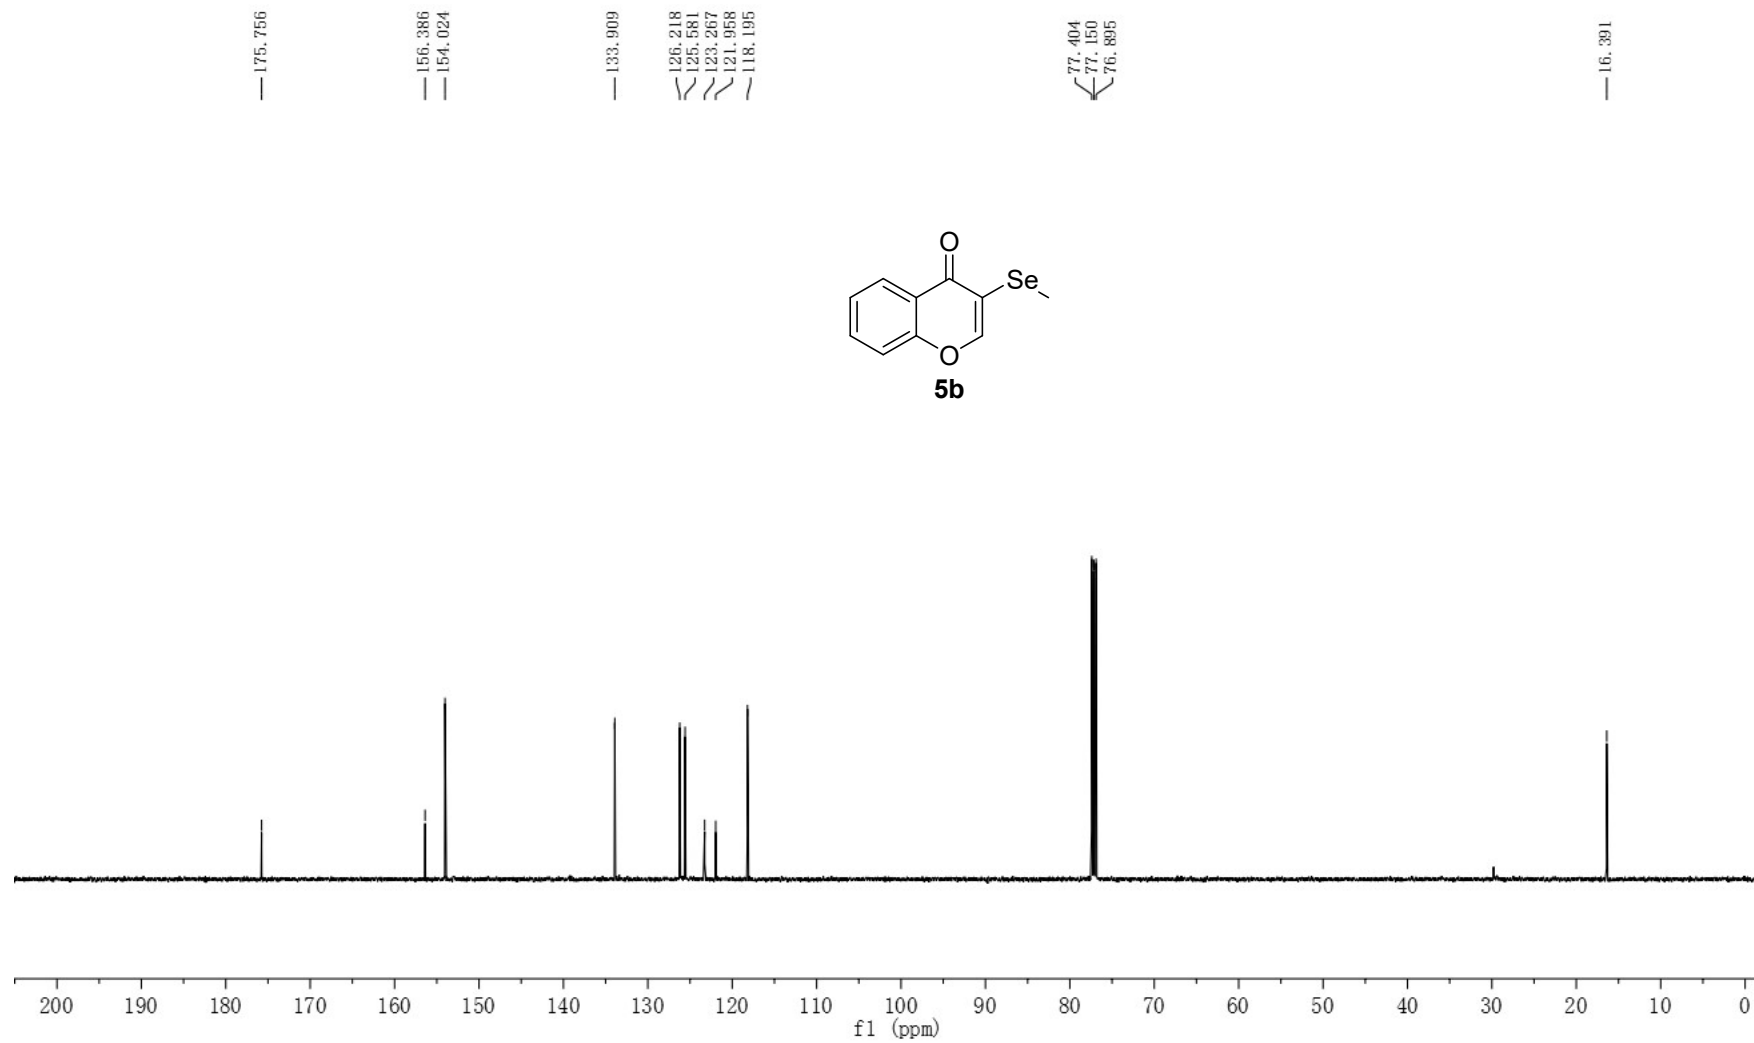

$^1\text{H}$  NMR (500 MHz,  $\text{CDCl}_3$ ) of **5c**

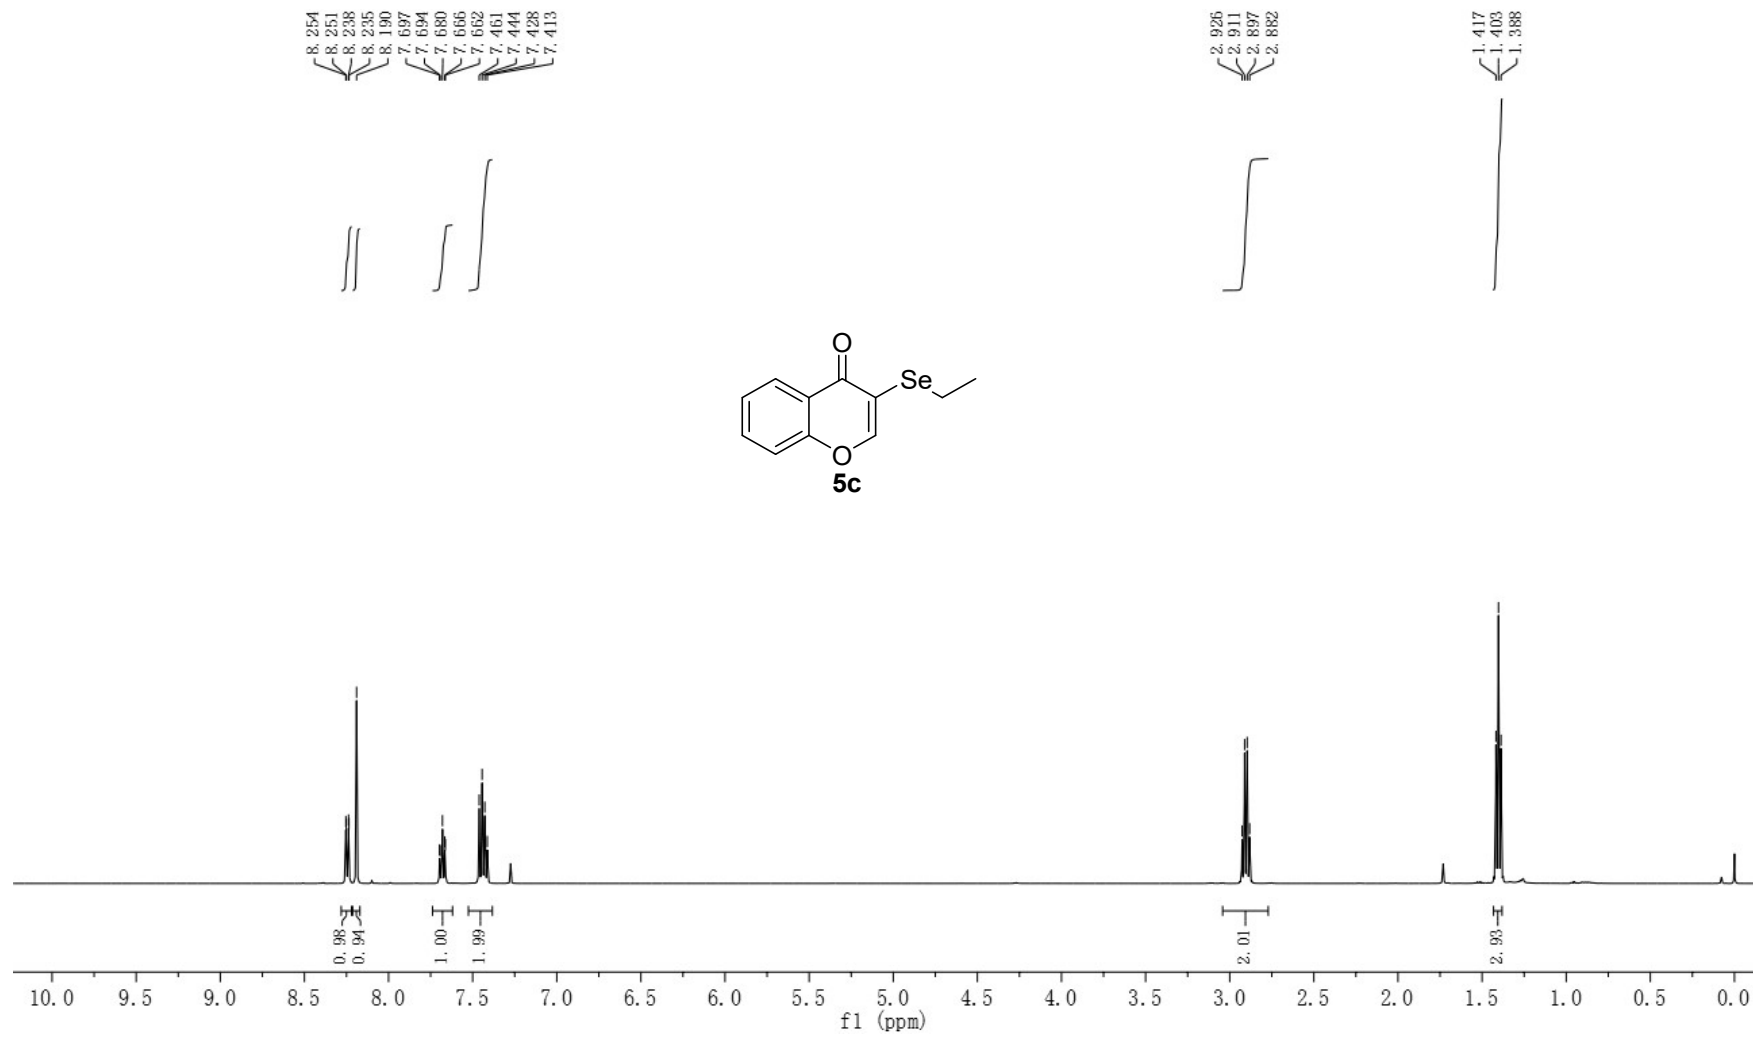

$^{13}\text{C}$  NMR (126 MHz,  $\text{CDCl}_3$ ) of **5c**

176.02

156.62  
156.48

133.85

126.42

125.62

123.32

118.16

114.48

77.40

77.15

76.90

19.92

15.51

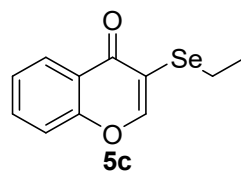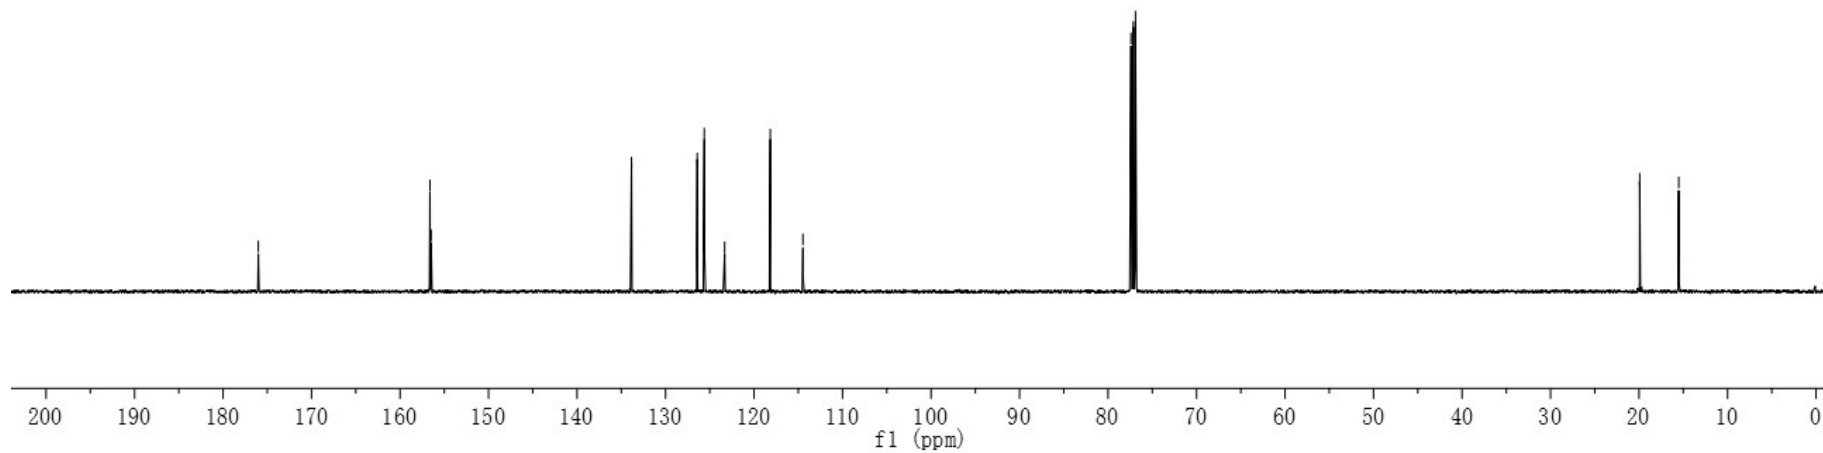

$^1\text{H}$  NMR (500 MHz,  $\text{CDCl}_3$ ) of **5d**

8.256  
8.253  
8.240  
8.237  
8.185  
7.695  
7.692  
7.678  
7.664  
7.661  
7.458  
7.442  
7.428  
7.413

2.885  
2.871  
2.856

1.731  
1.717  
1.702  
1.687  
1.673  
1.658

1.015  
1.000  
0.986

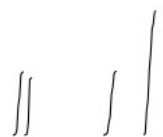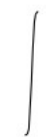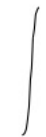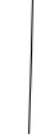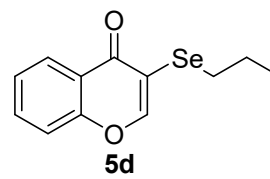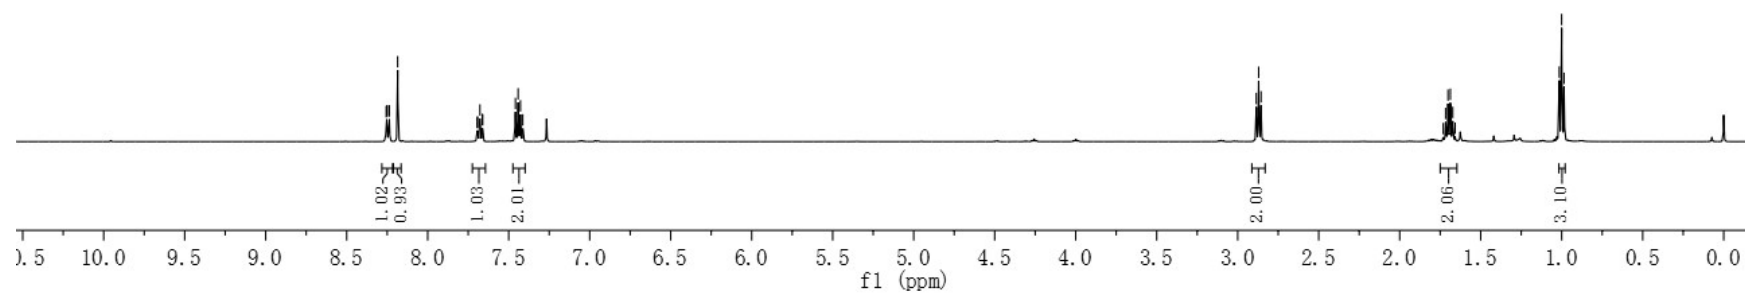

$^{13}\text{C}$  NMR (126 MHz,  $\text{CDCl}_3$ ) of **5d**

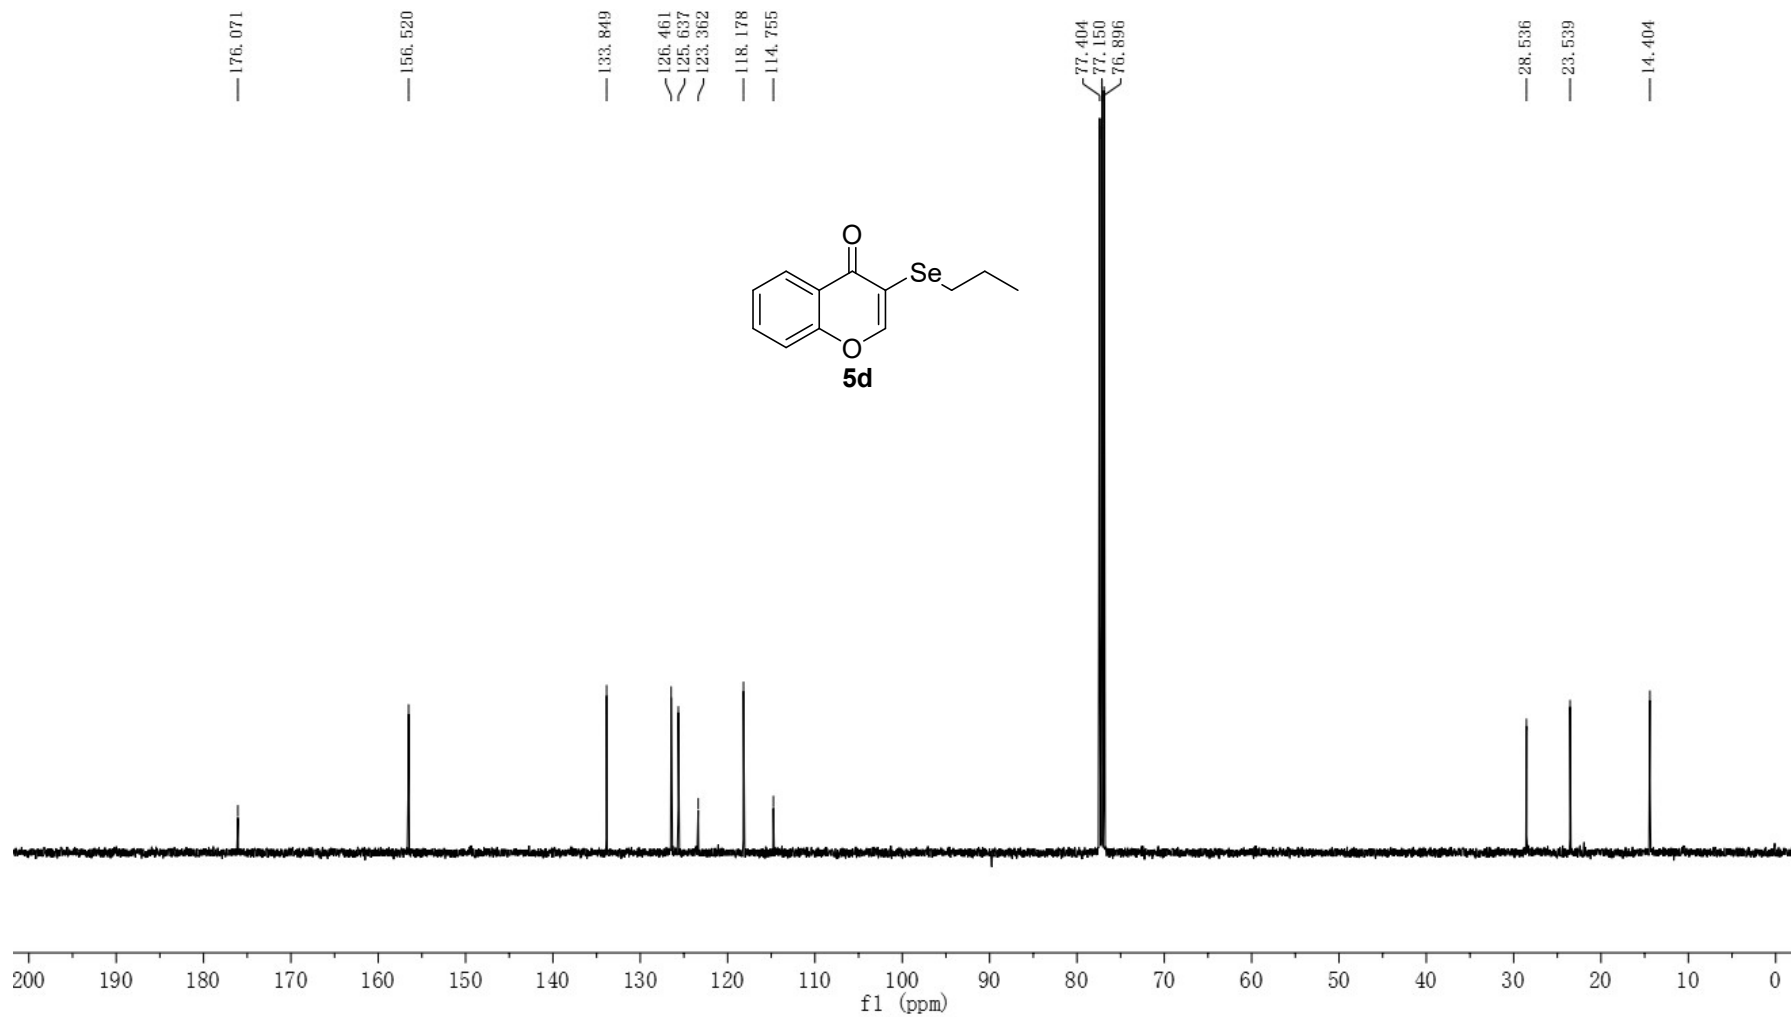

176.071

156.520

133.849

126.461

125.637

123.362

118.178

114.755

77.404

77.150

76.896

28.536

23.539

14.404

$^1\text{H}$  NMR (500 MHz,  $\text{CDCl}_3$ ) of **5e**

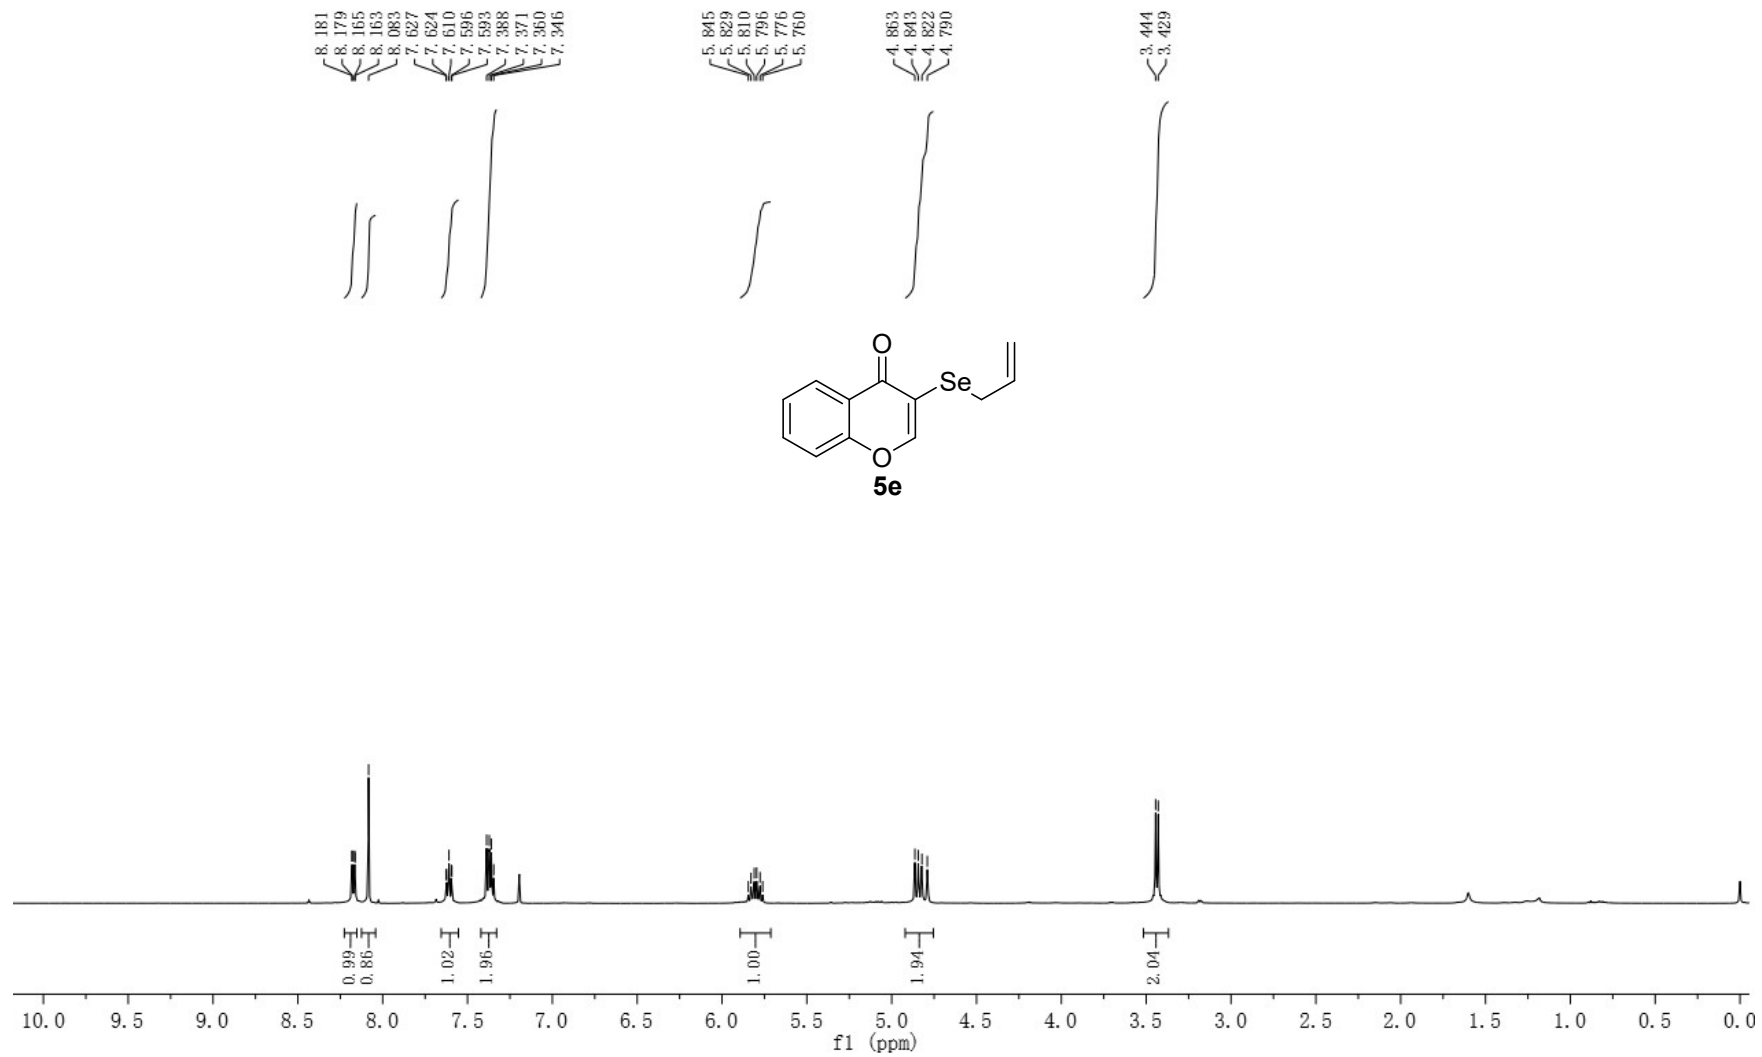

$^{13}\text{C}$  NMR (126 MHz,  $\text{CDCl}_3$ ) of **5e**

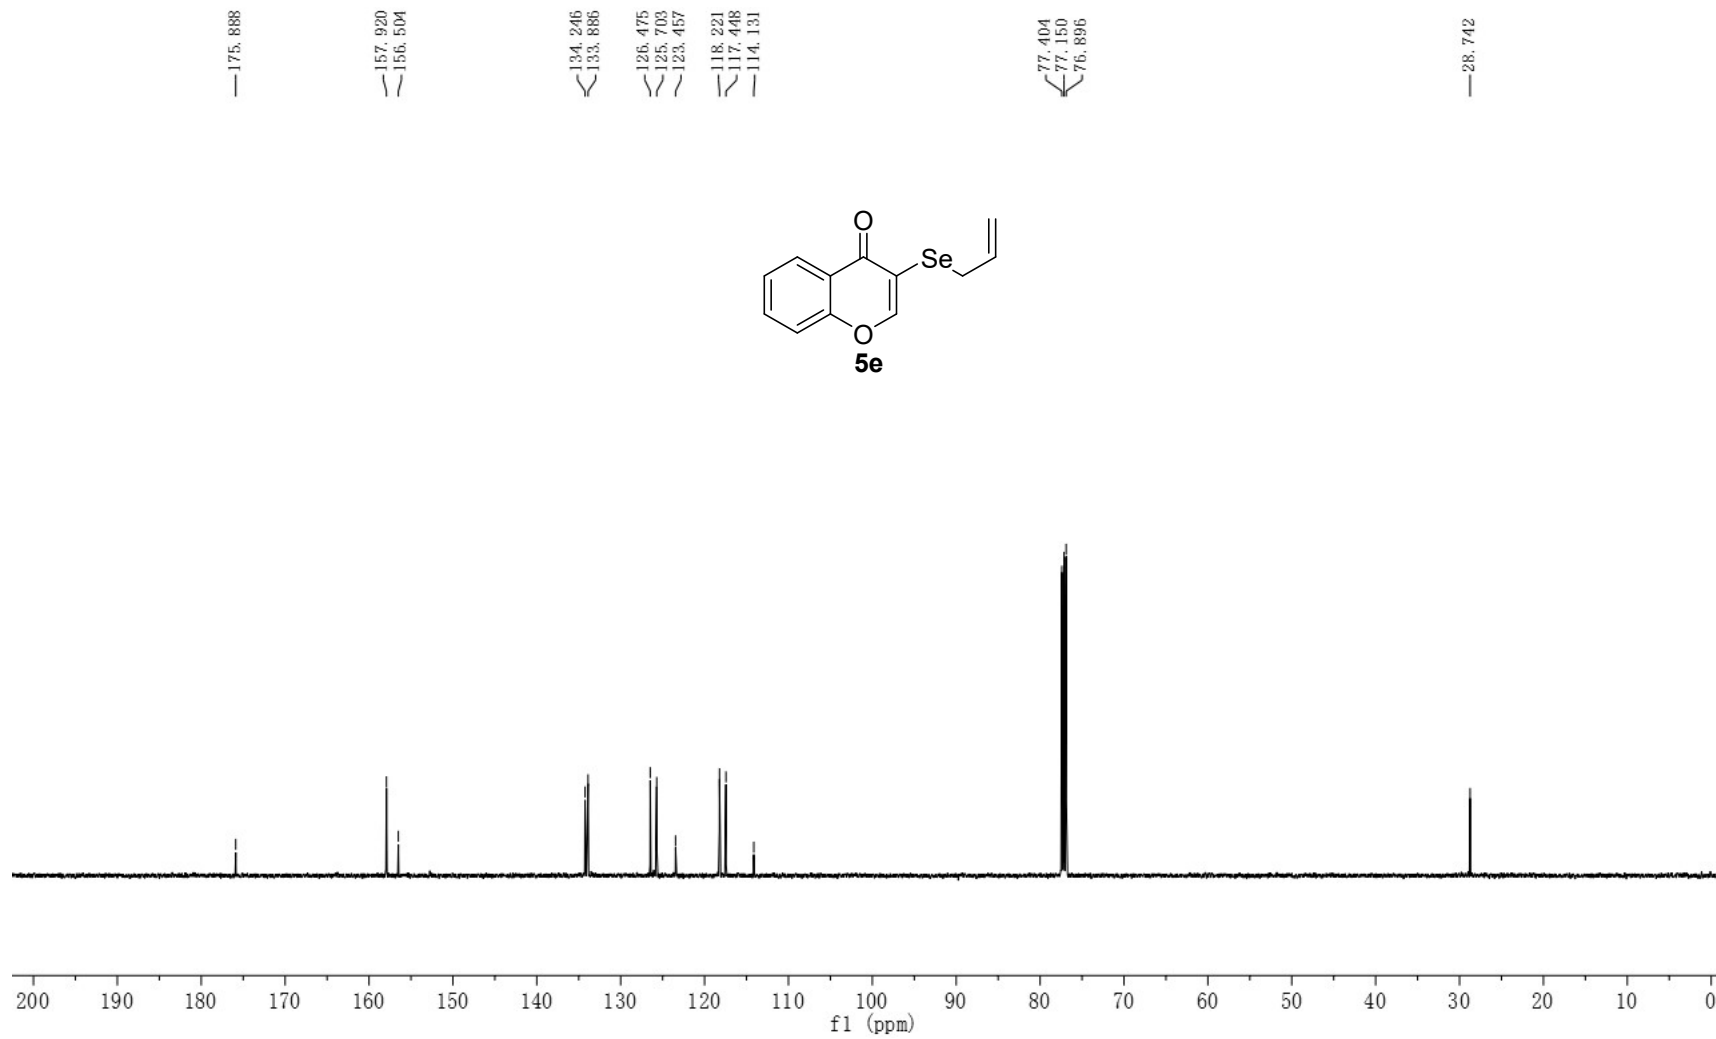

$^1\text{H}$  NMR (500 MHz,  $\text{CDCl}_3$ ) of **5f**

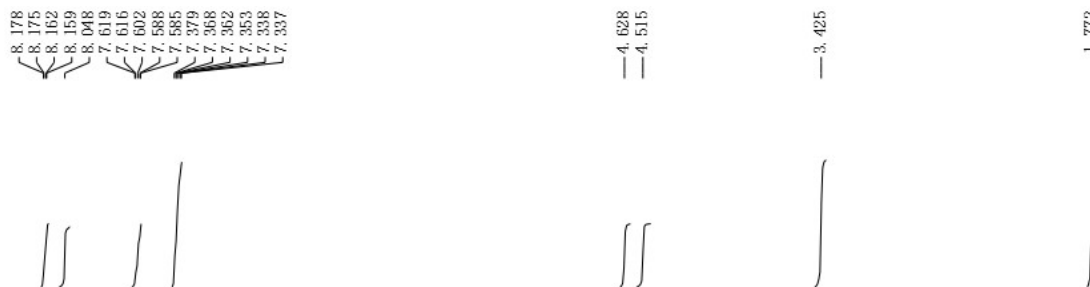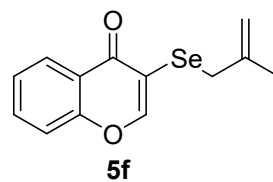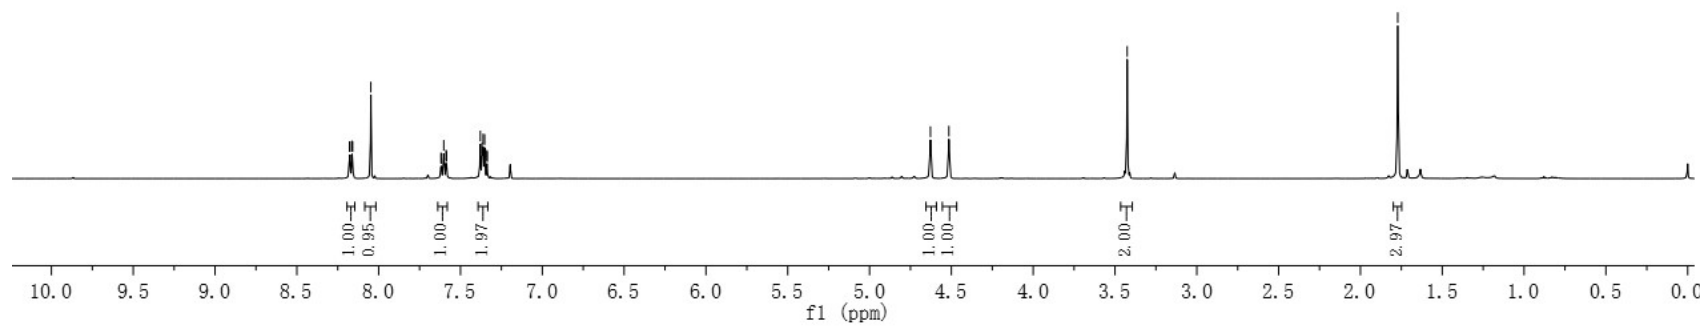



$^{13}\text{C}$  NMR (126 MHz,  $\text{CDCl}_3$ ) of **5f**

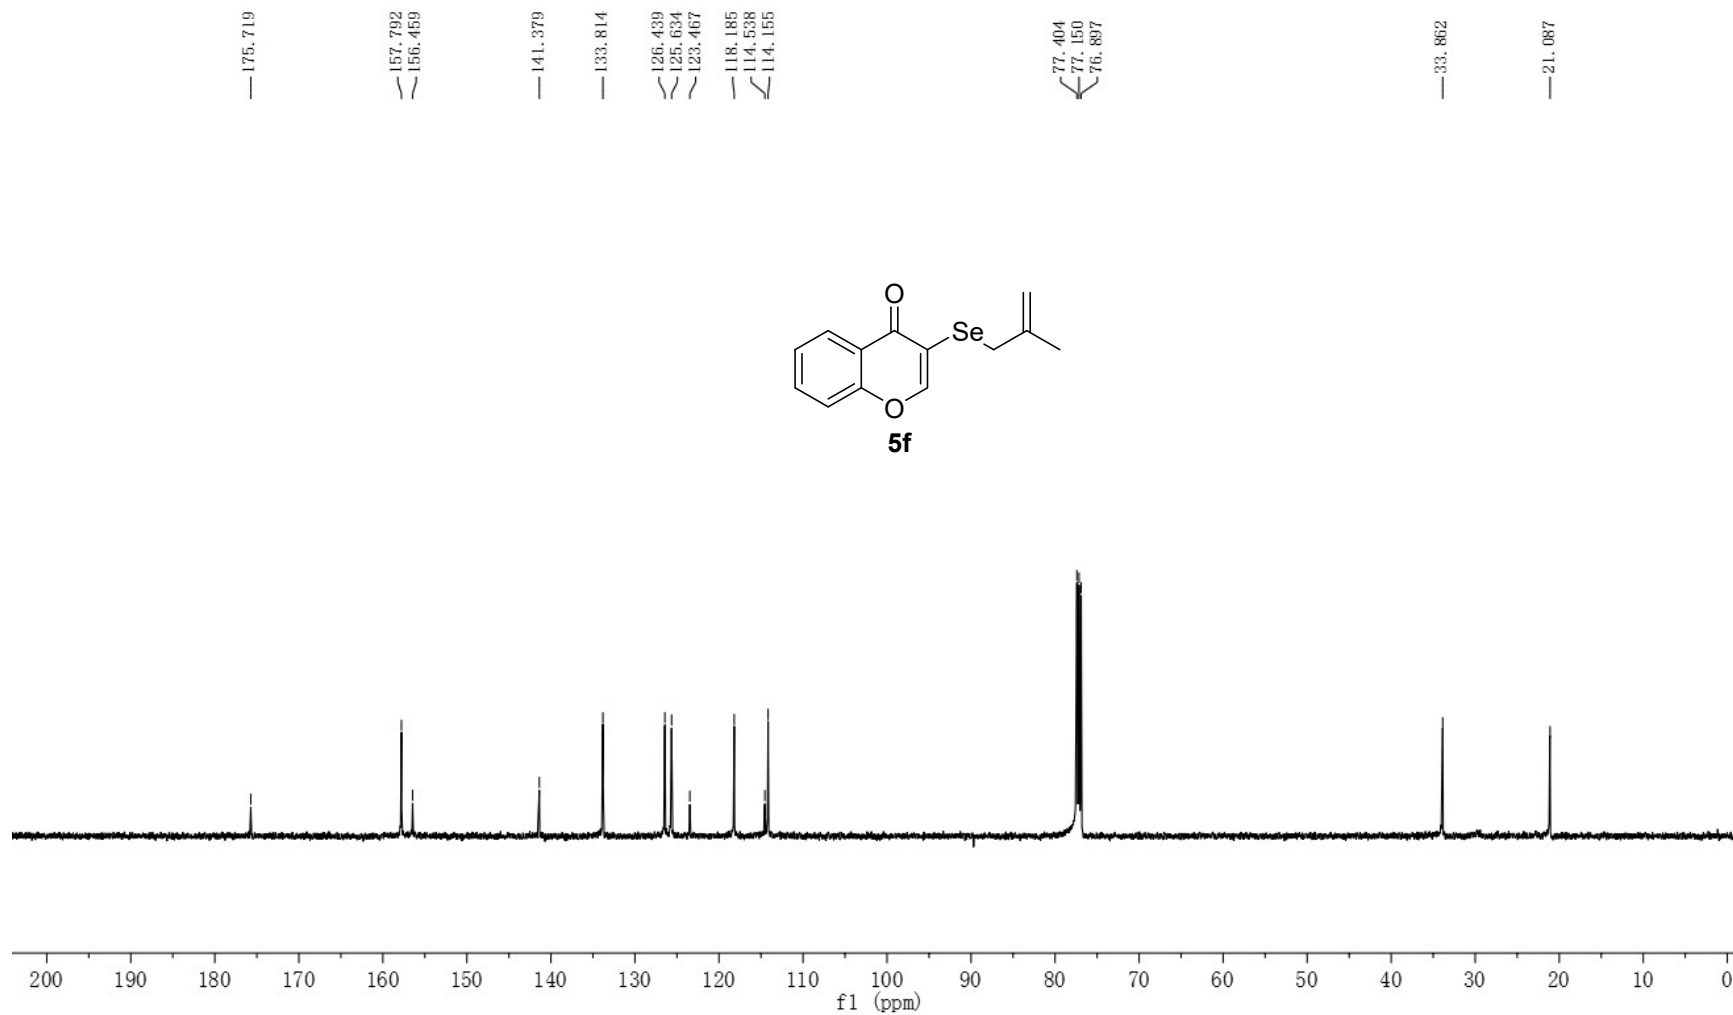

$^1\text{H}$  NMR (500 MHz,  $\text{CDCl}_3$ ) of **5g**

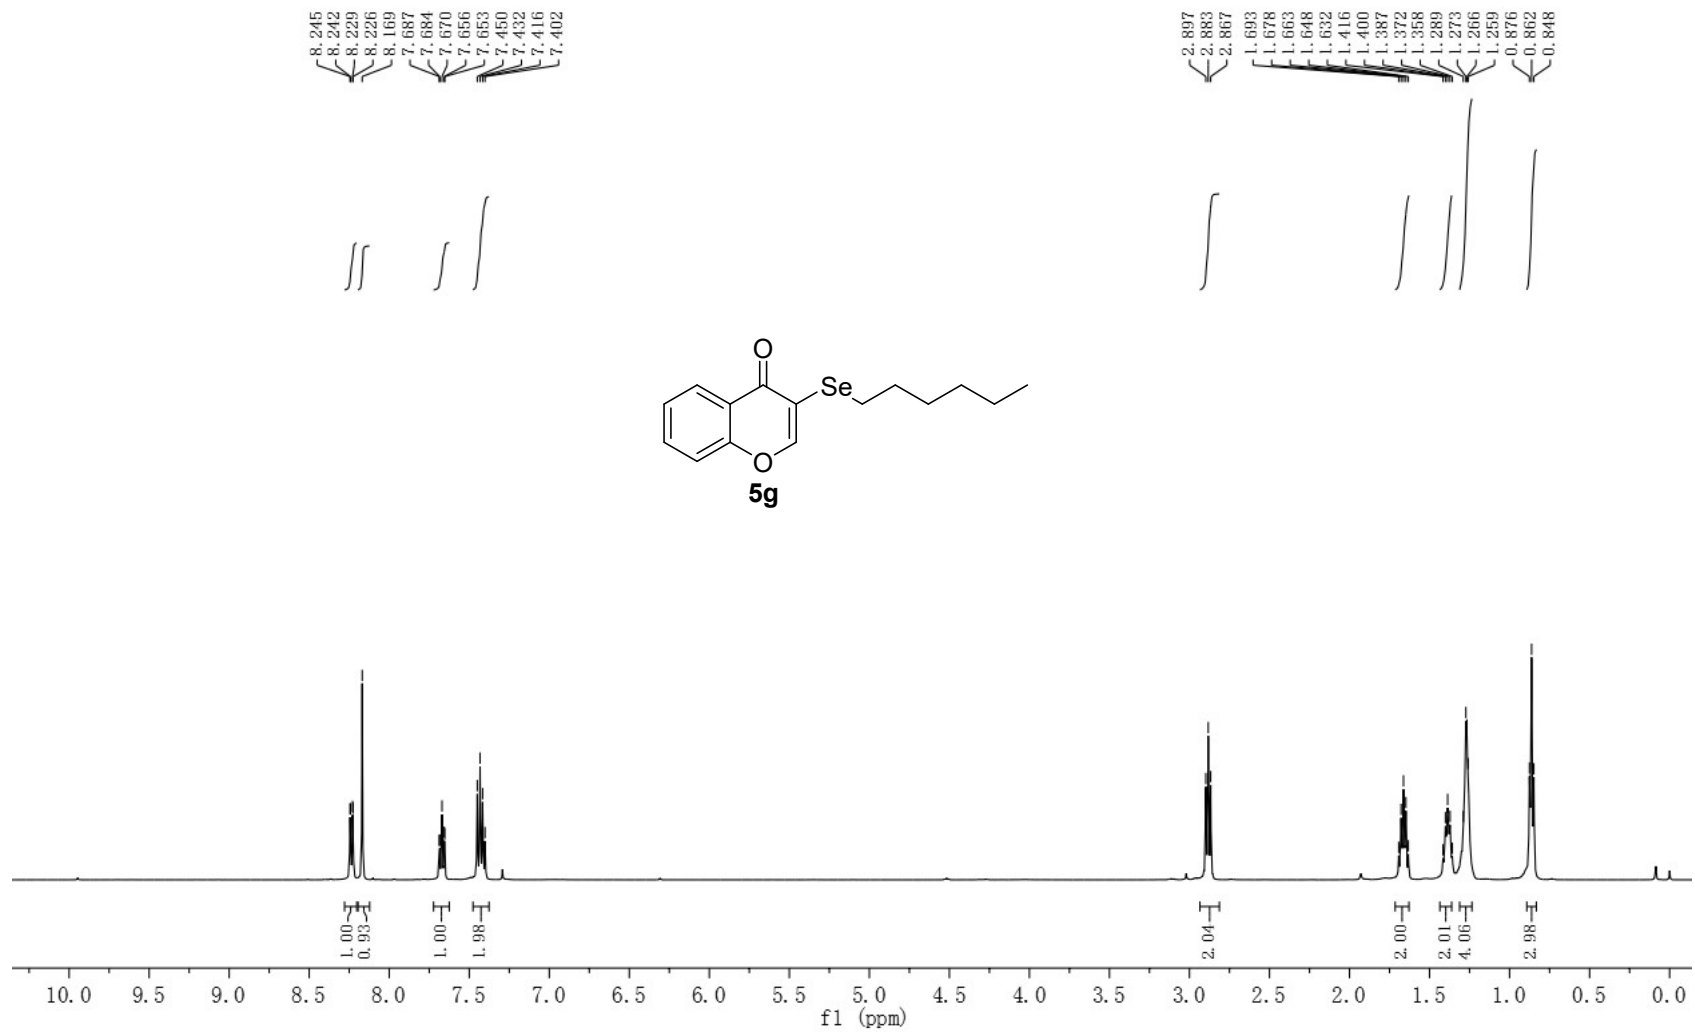

$^{13}\text{C}$  NMR (126 MHz,  $\text{CDCl}_3$ ) of **5g**

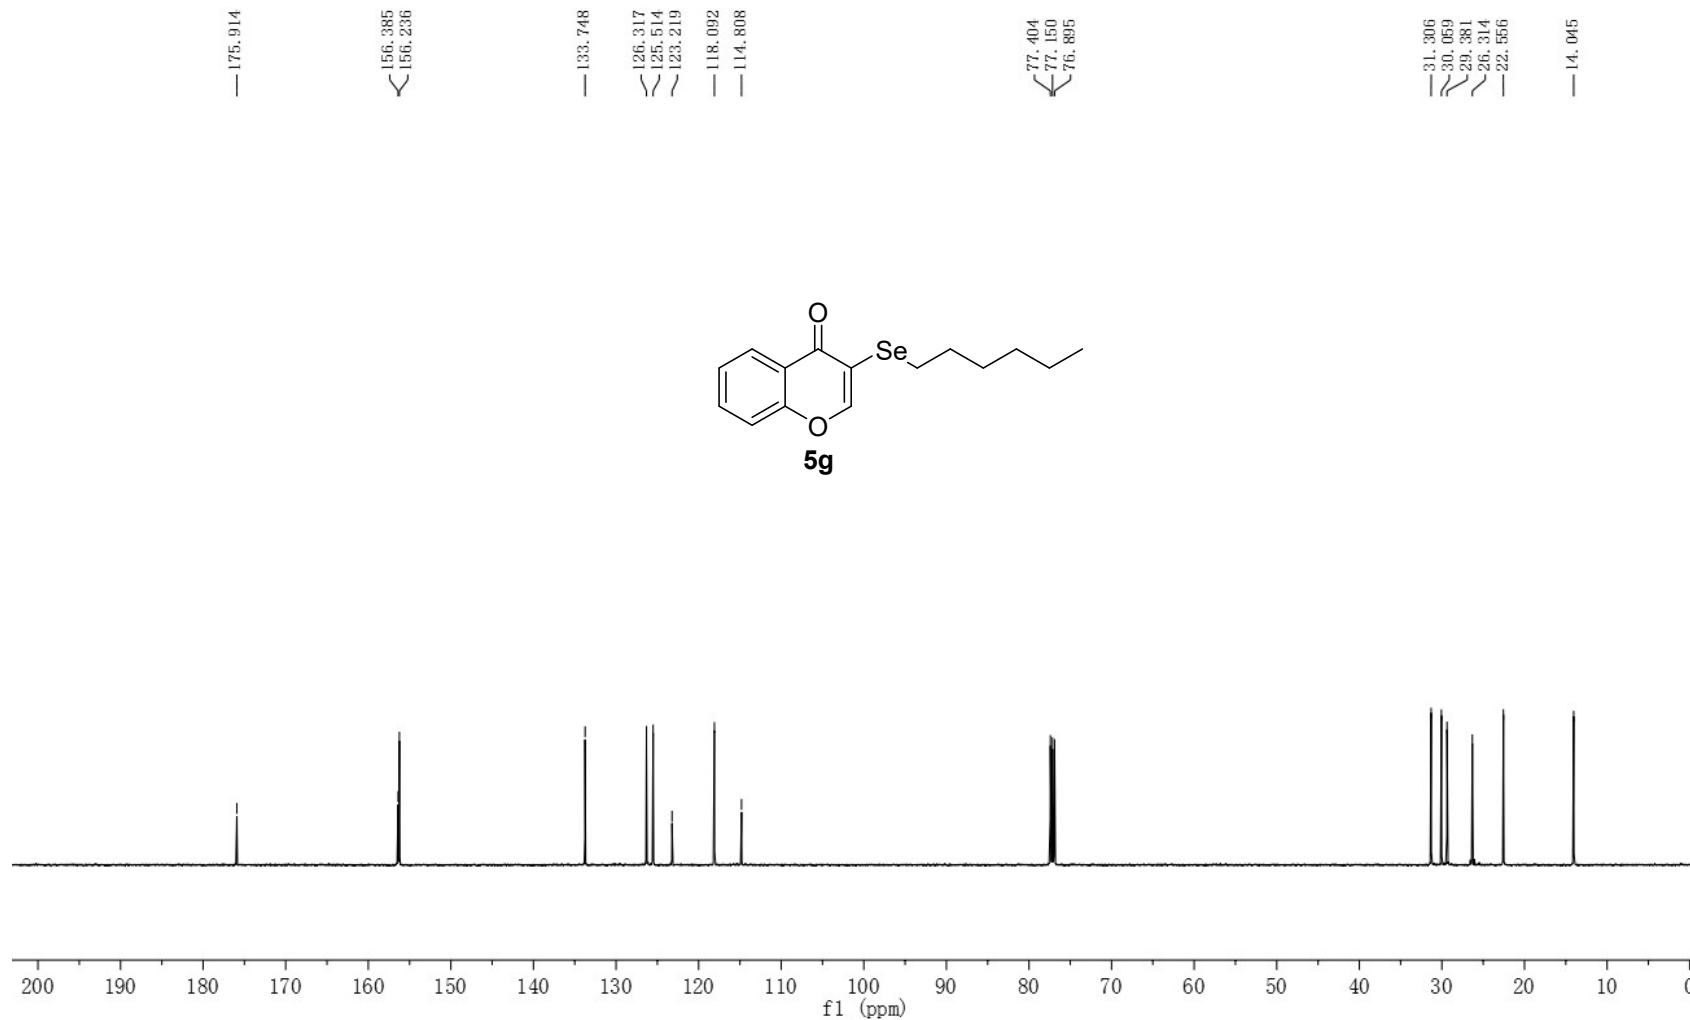

$^1\text{H}$  NMR (500 MHz,  $\text{CDCl}_3$ ) of **5h**

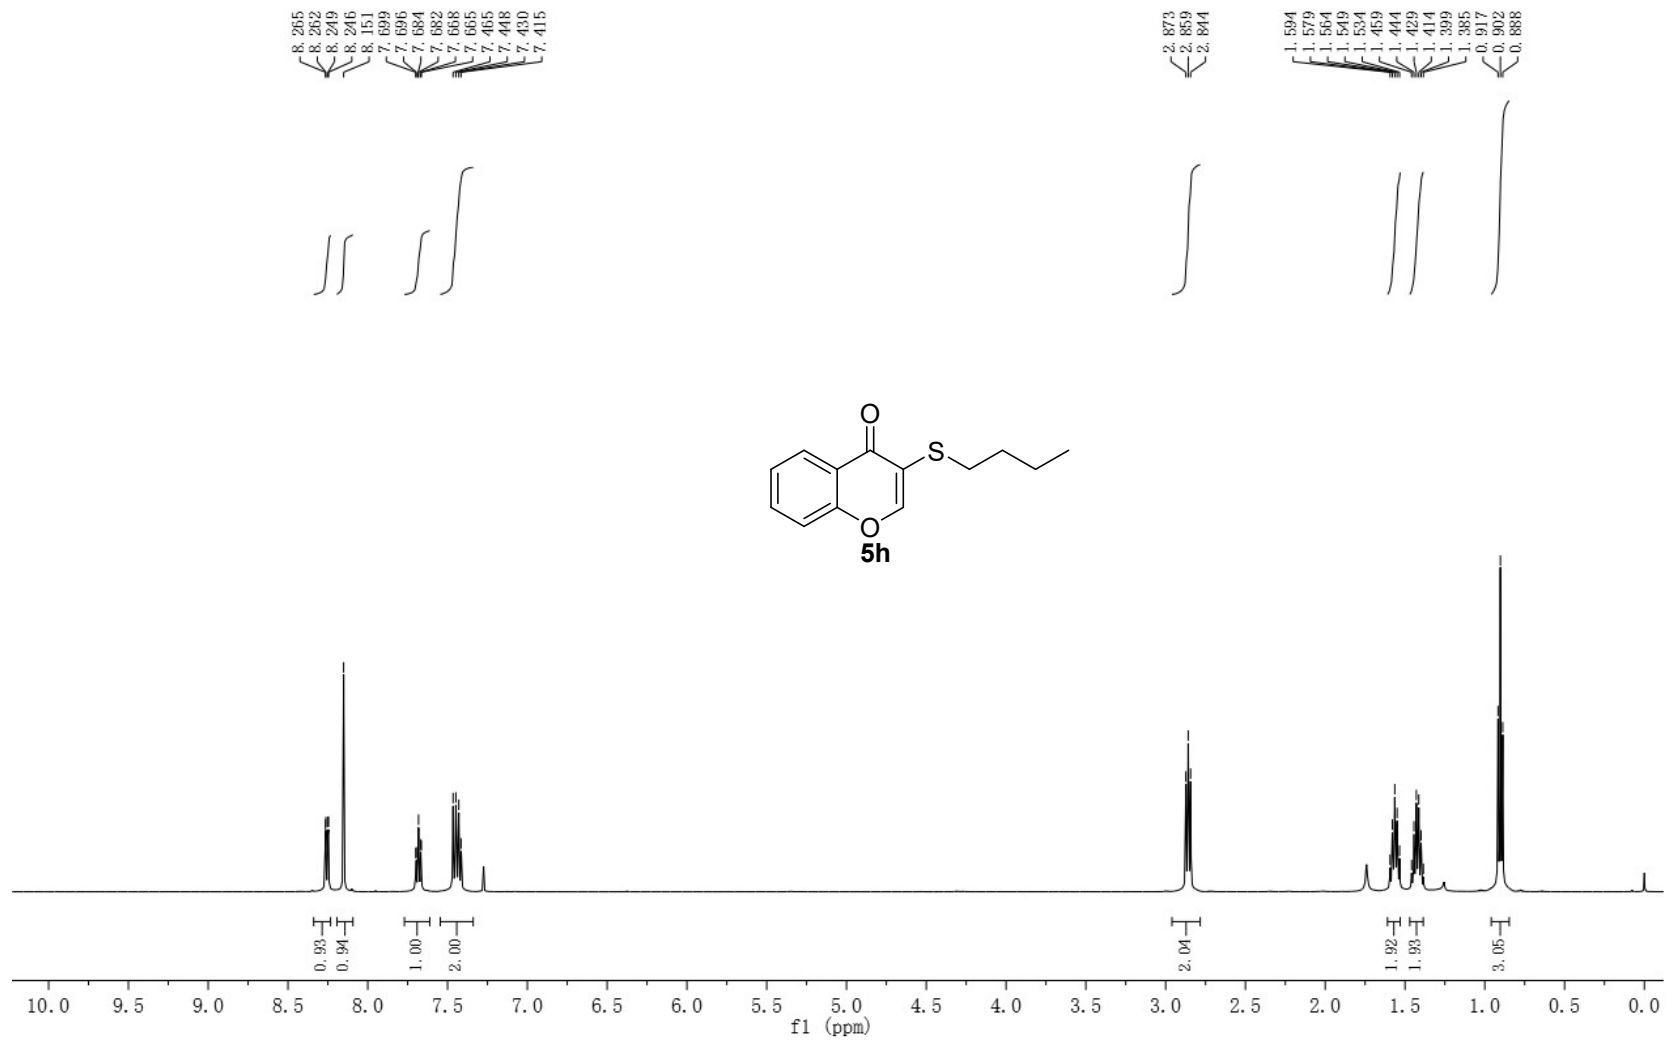

$^{13}\text{C}$  NMR (126 MHz,  $\text{CDCl}_3$ ) of **5h**

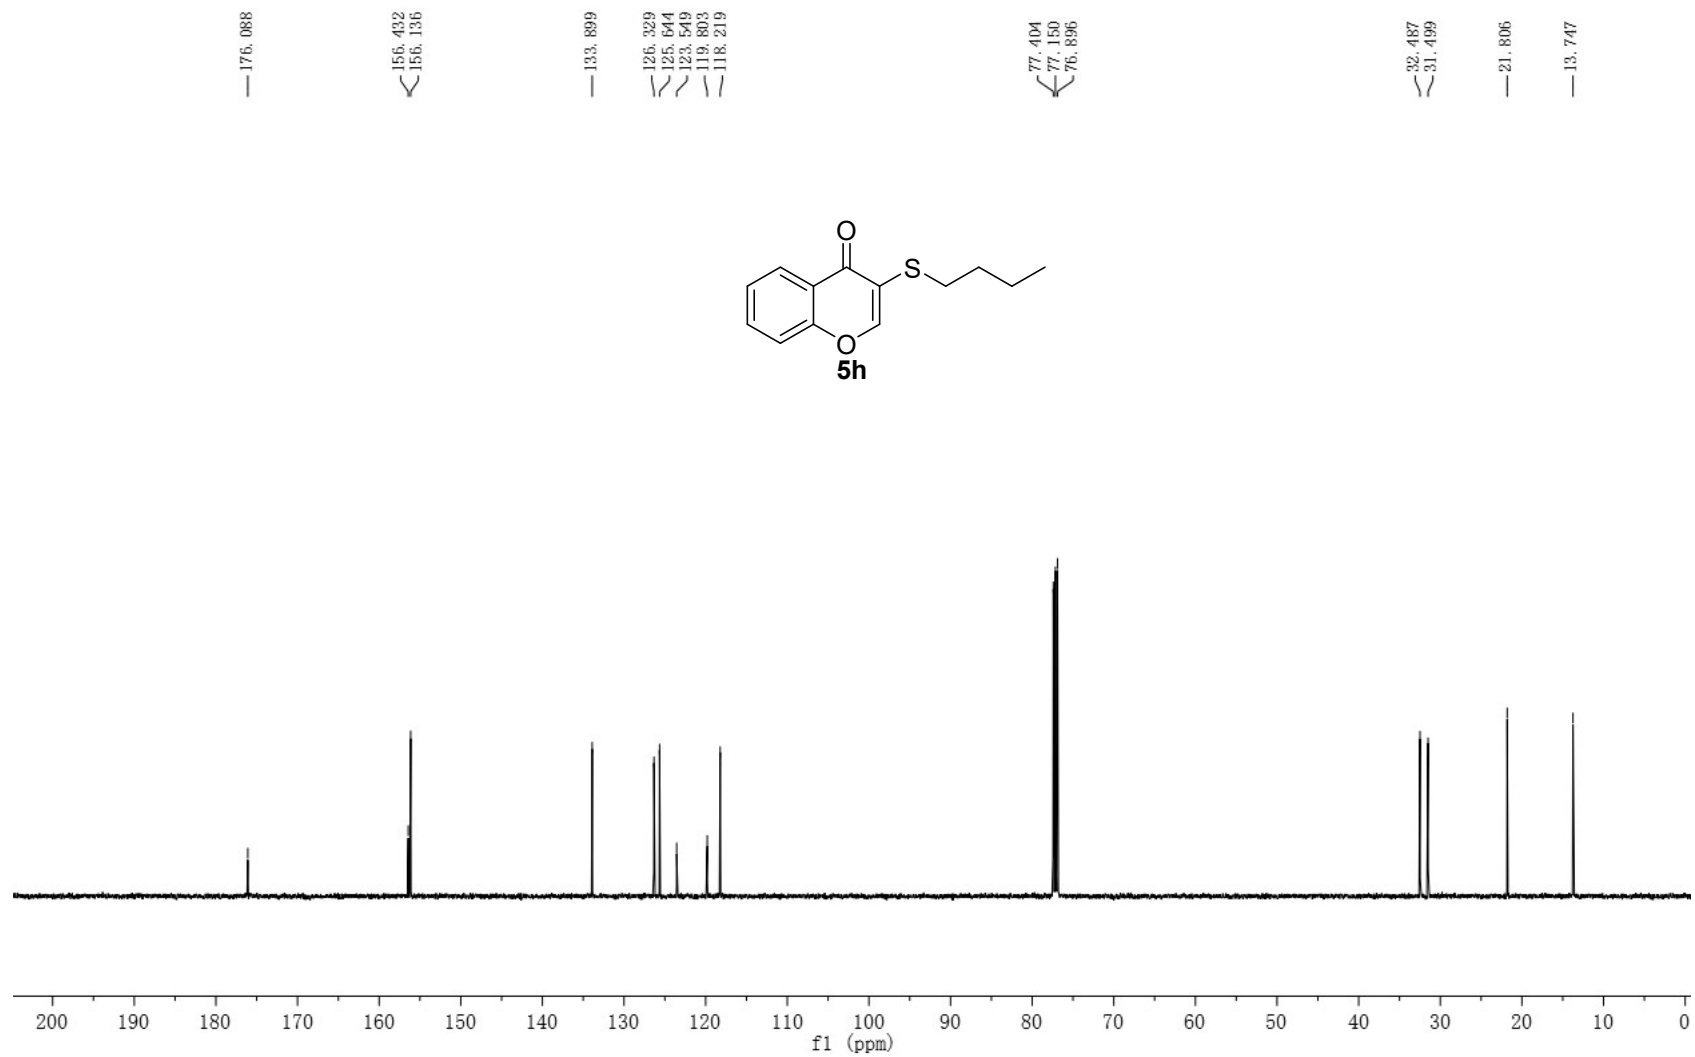

$^1\text{H}$  NMR (500 MHz,  $\text{CDCl}_3$ ) of **5i**

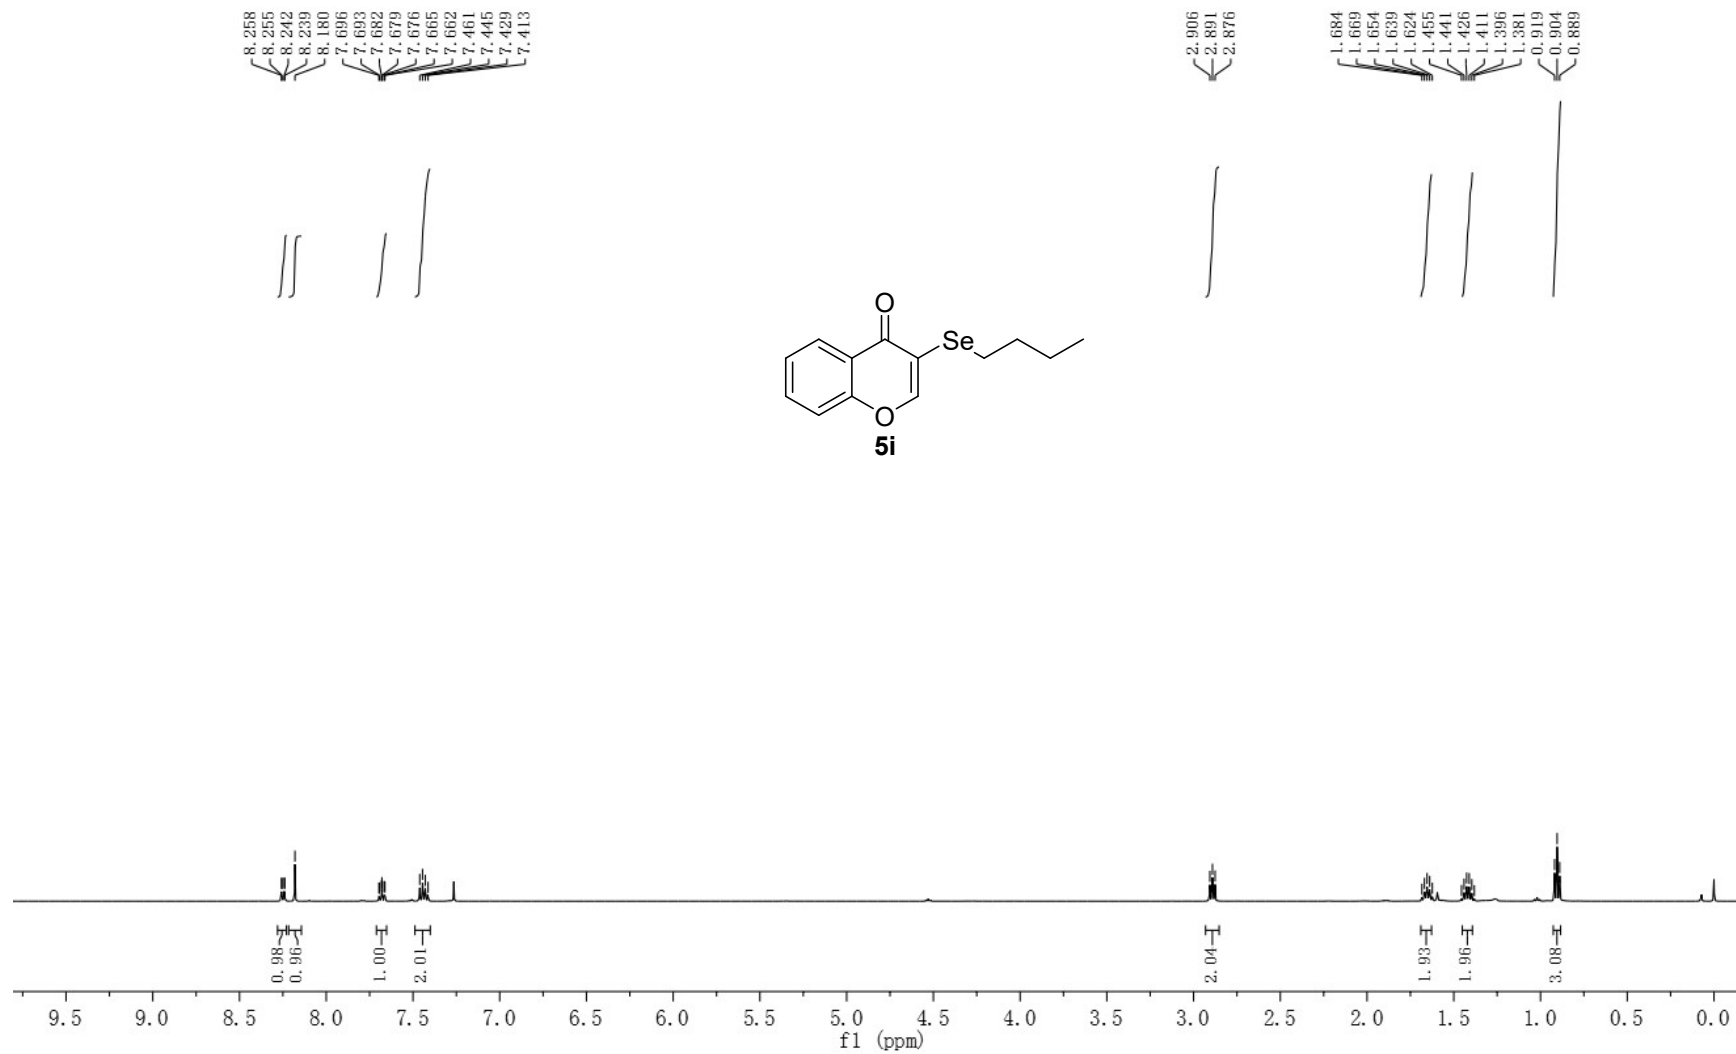

$^{13}\text{C}$  NMR (126 MHz,  $\text{CDCl}_3$ ) of **5i**

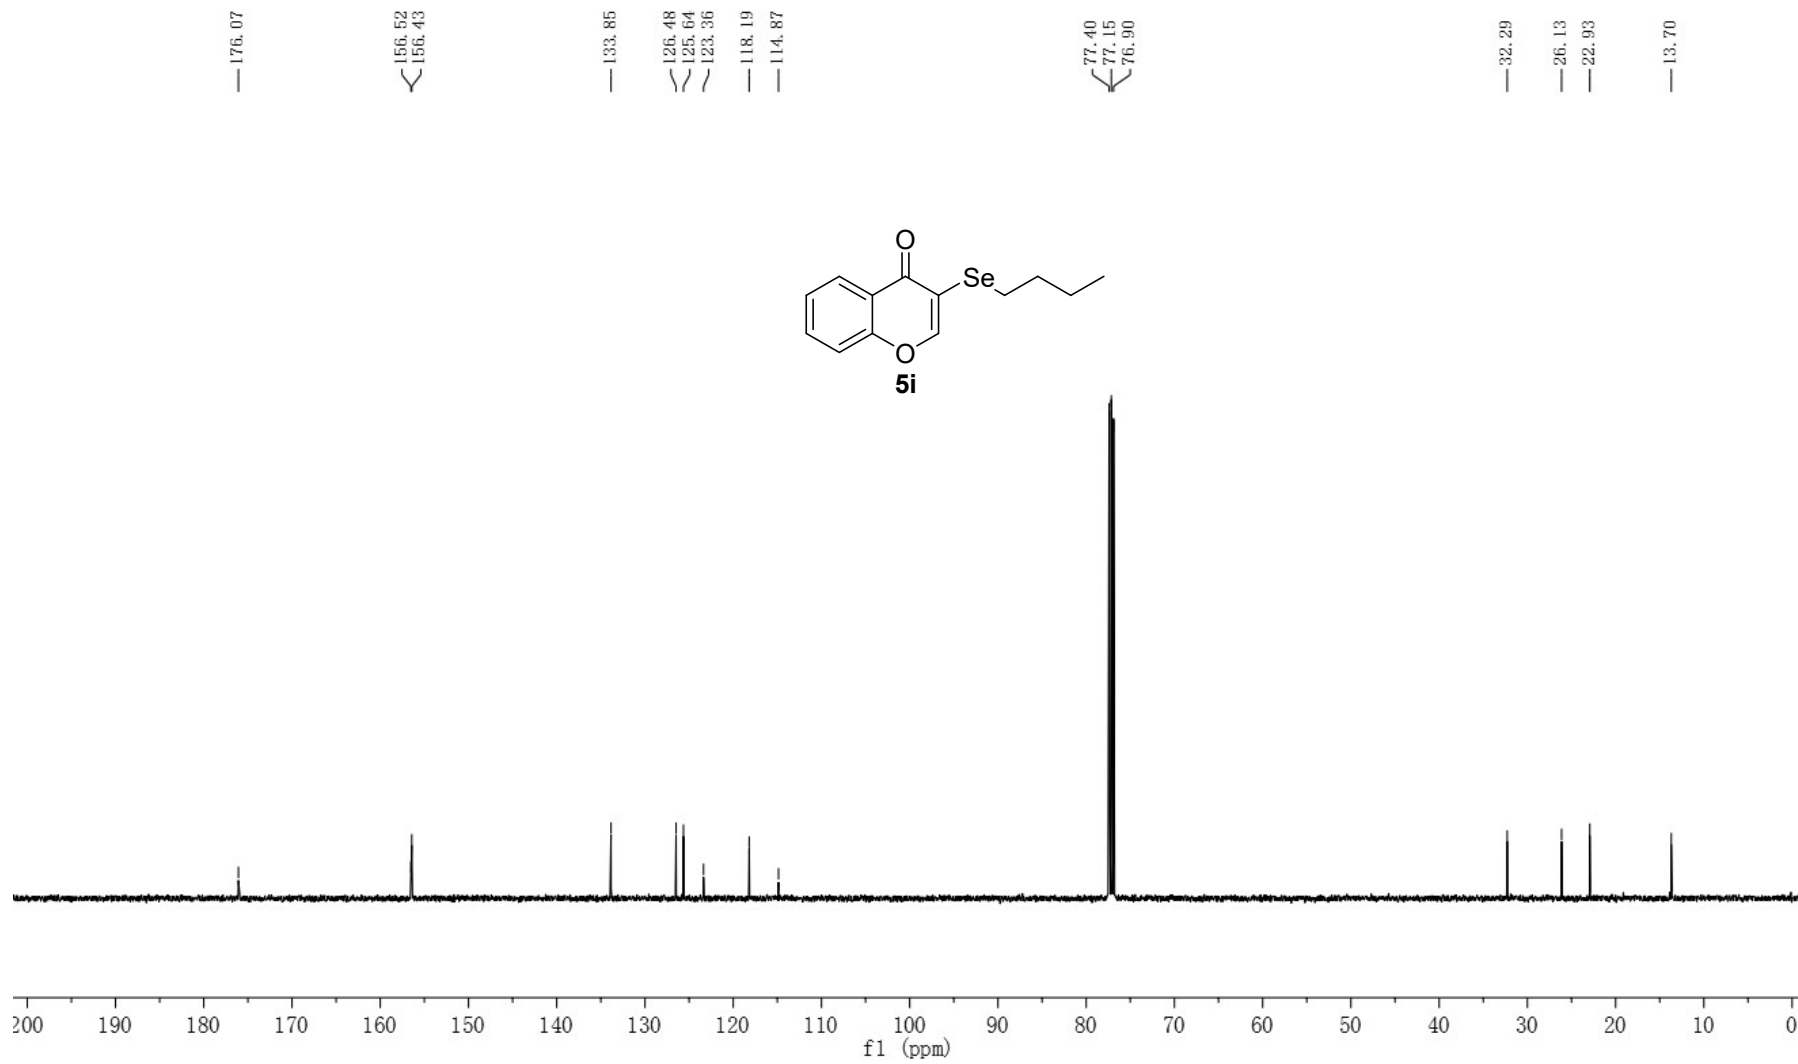

<sup>1</sup>H NMR (500 MHz, CDCl<sub>3</sub>) of **5j**

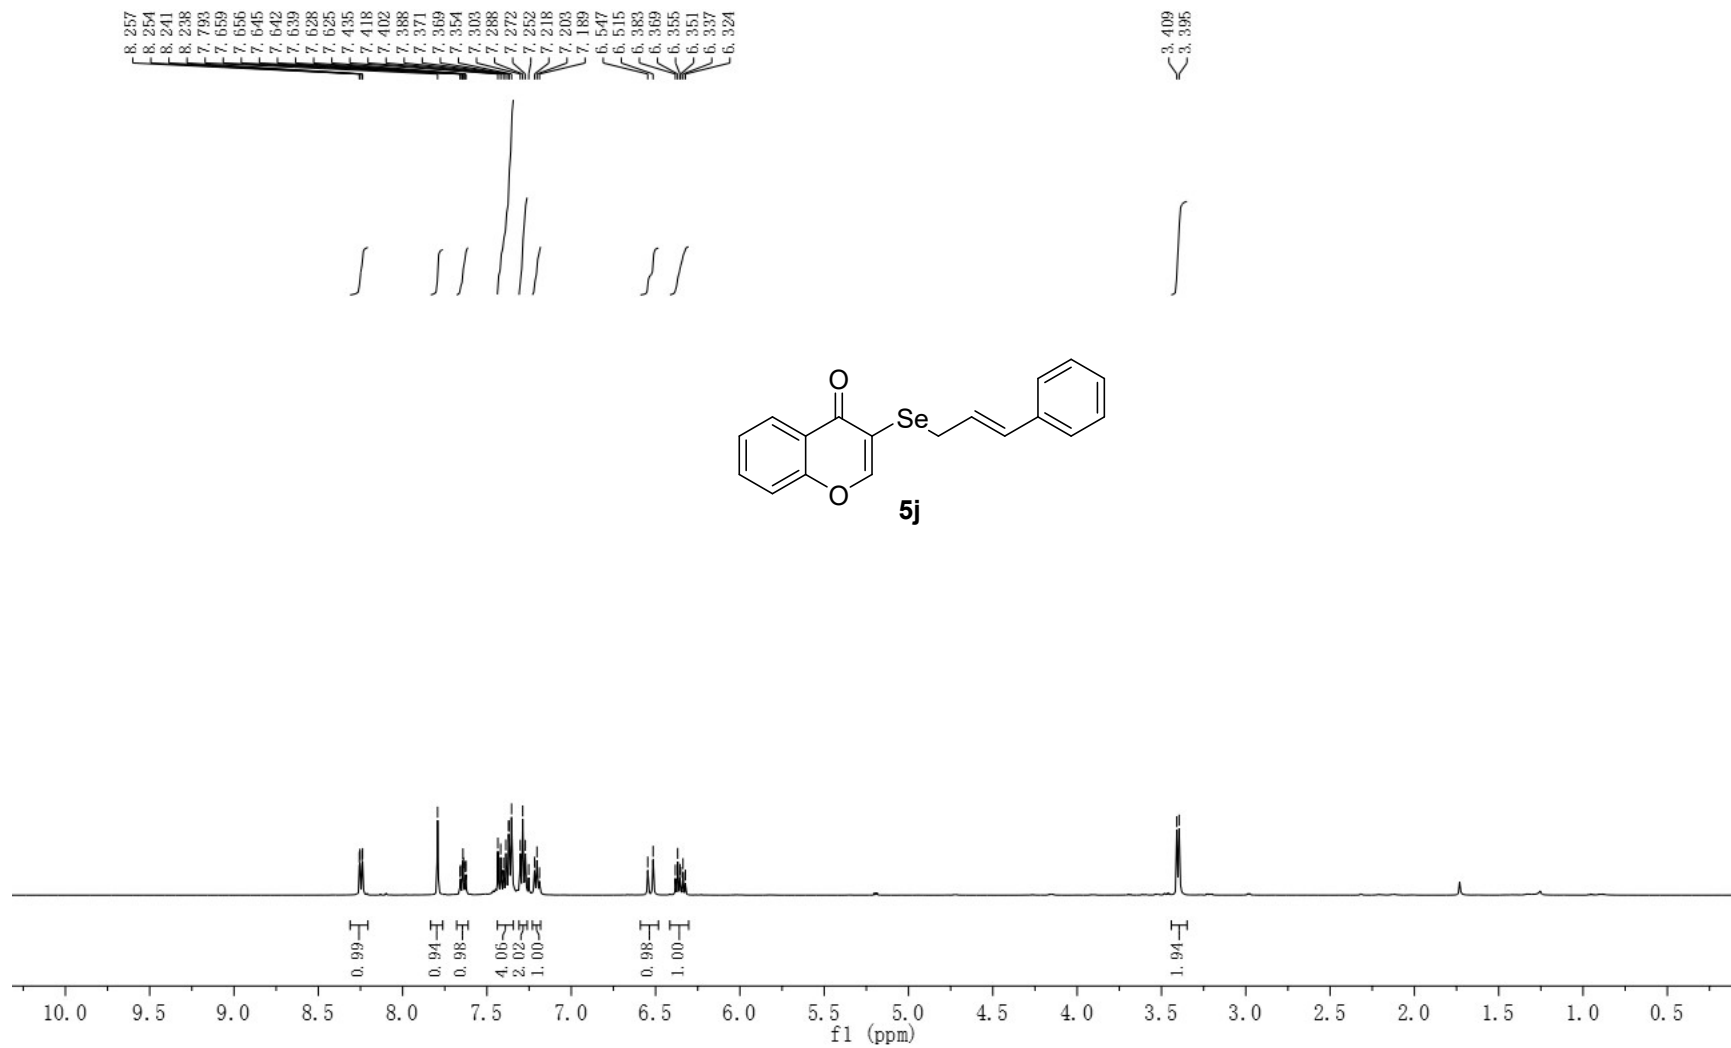



$^{13}\text{C}$  NMR (126 MHz,  $\text{CDCl}_3$ ) of **5j**

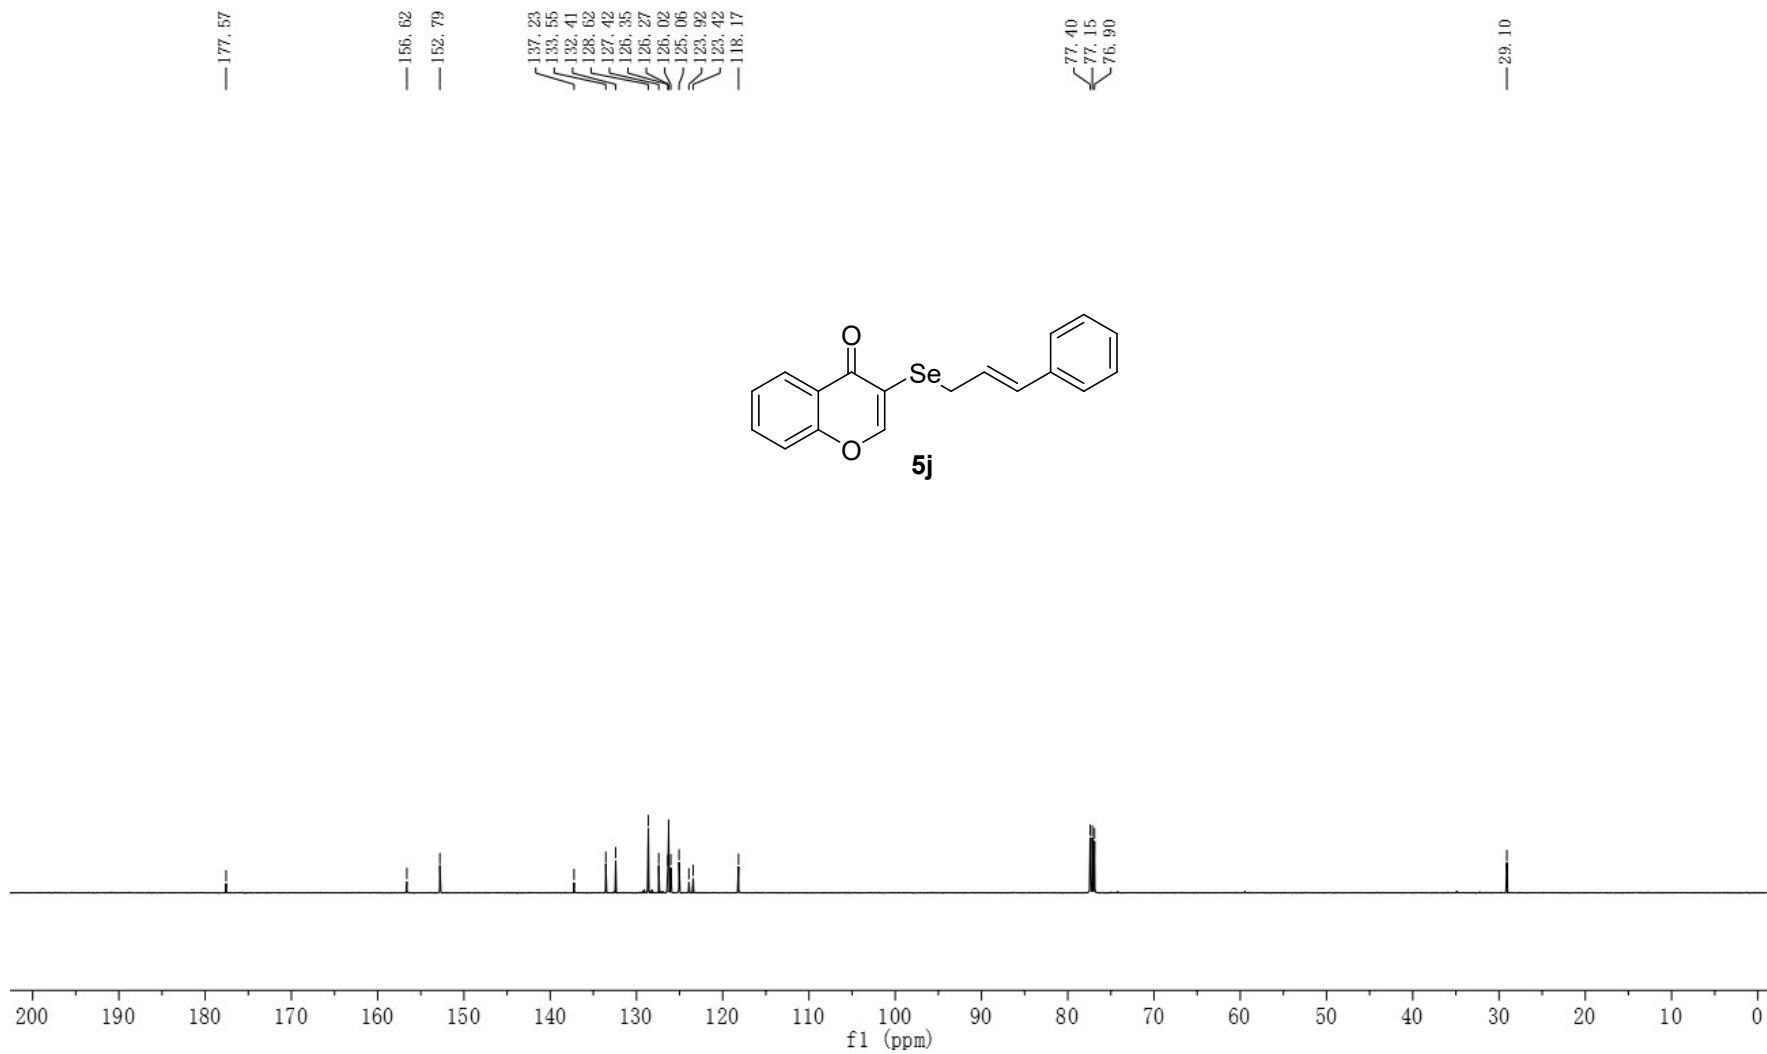

$^1\text{H}$  NMR (500 MHz,  $\text{CDCl}_3$ ) of **5k**

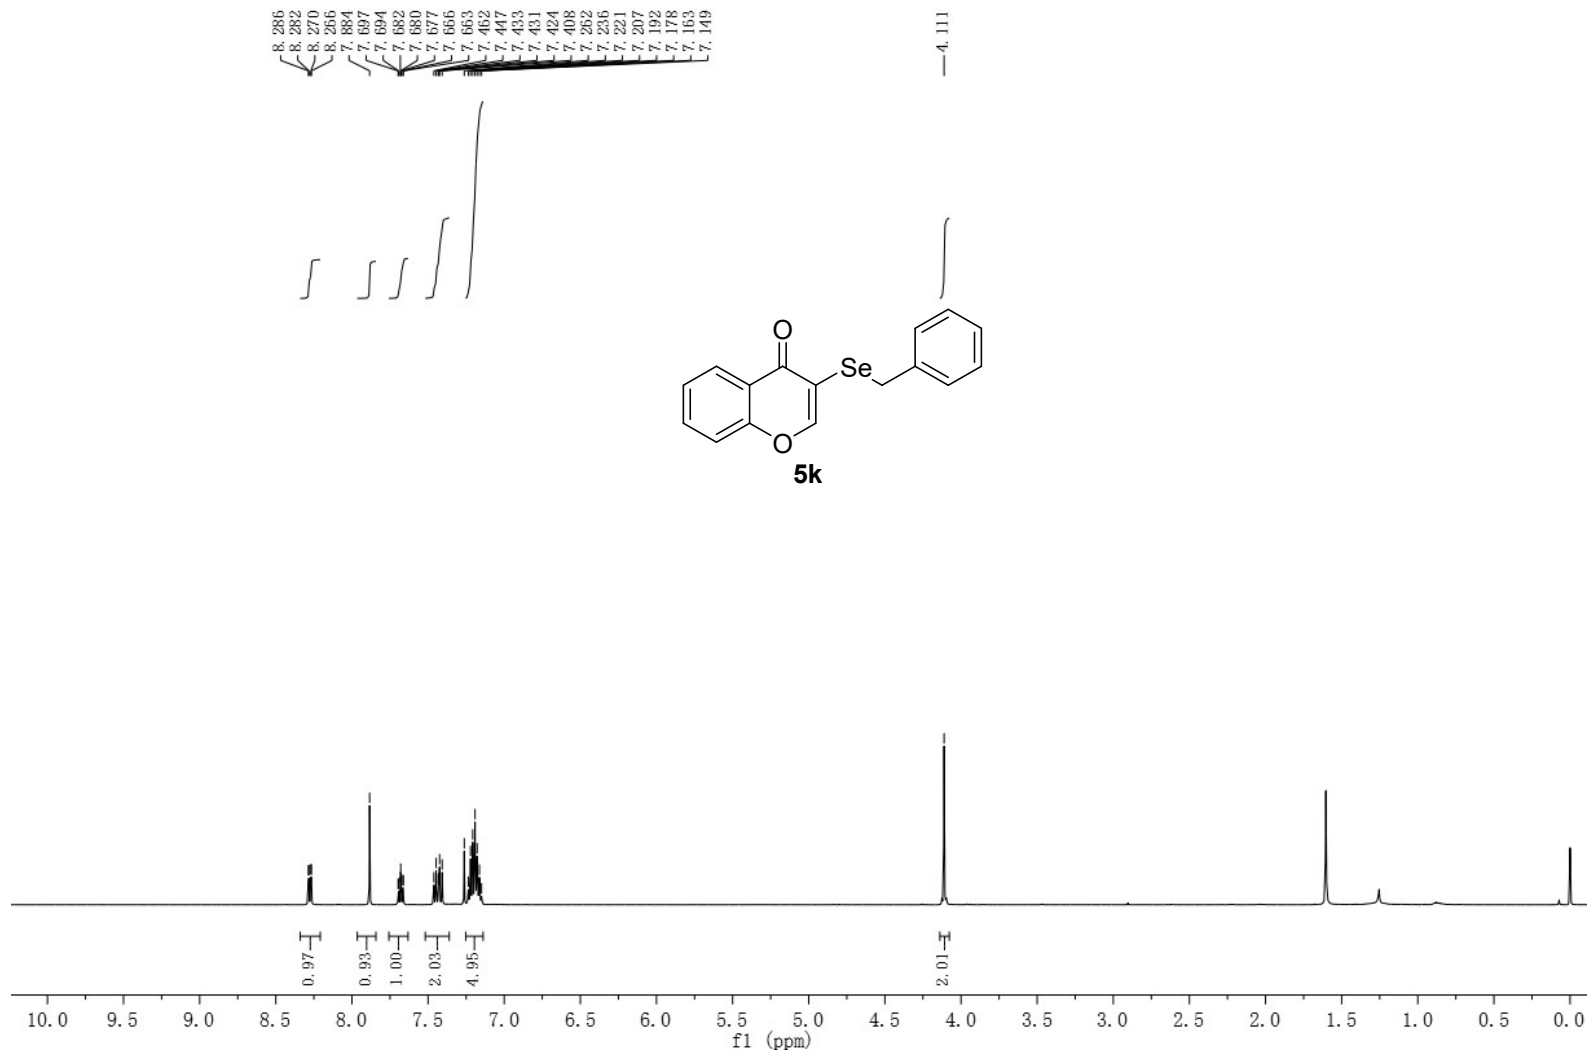

$^{13}\text{C}$  NMR (126 MHz,  $\text{CDCl}_3$ ) of **5k**

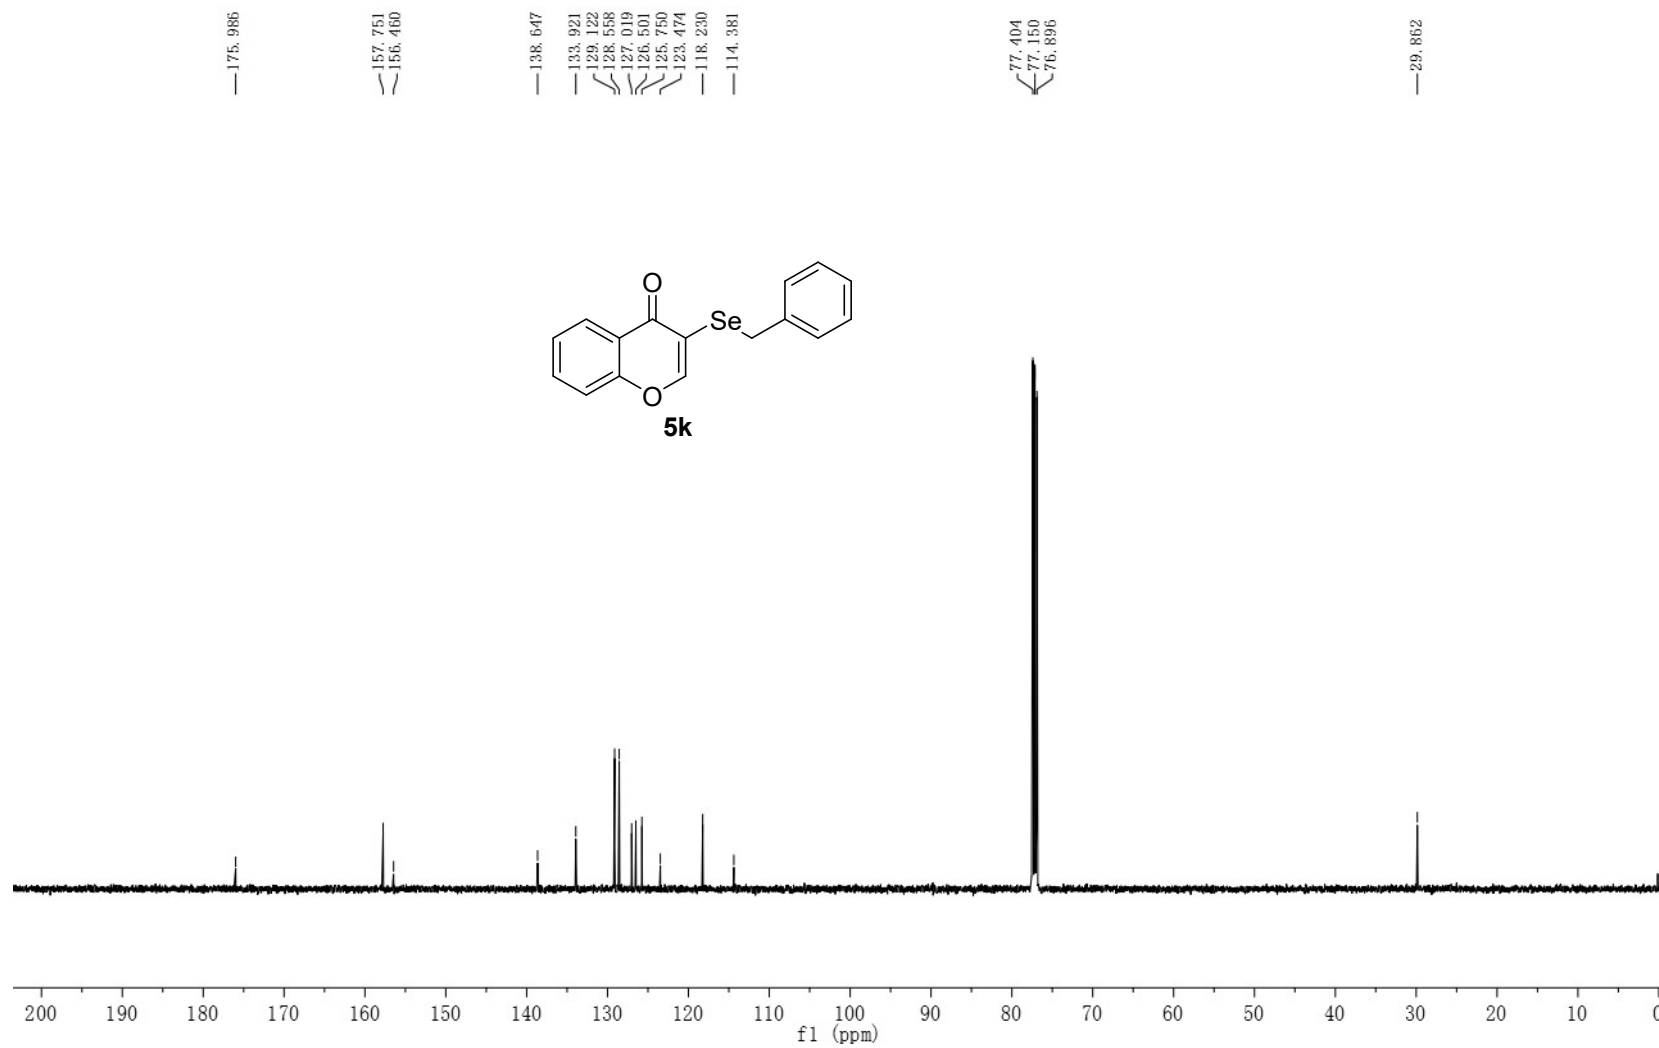

<sup>1</sup>H NMR (500 MHz, CDCl<sub>3</sub>) of **51**

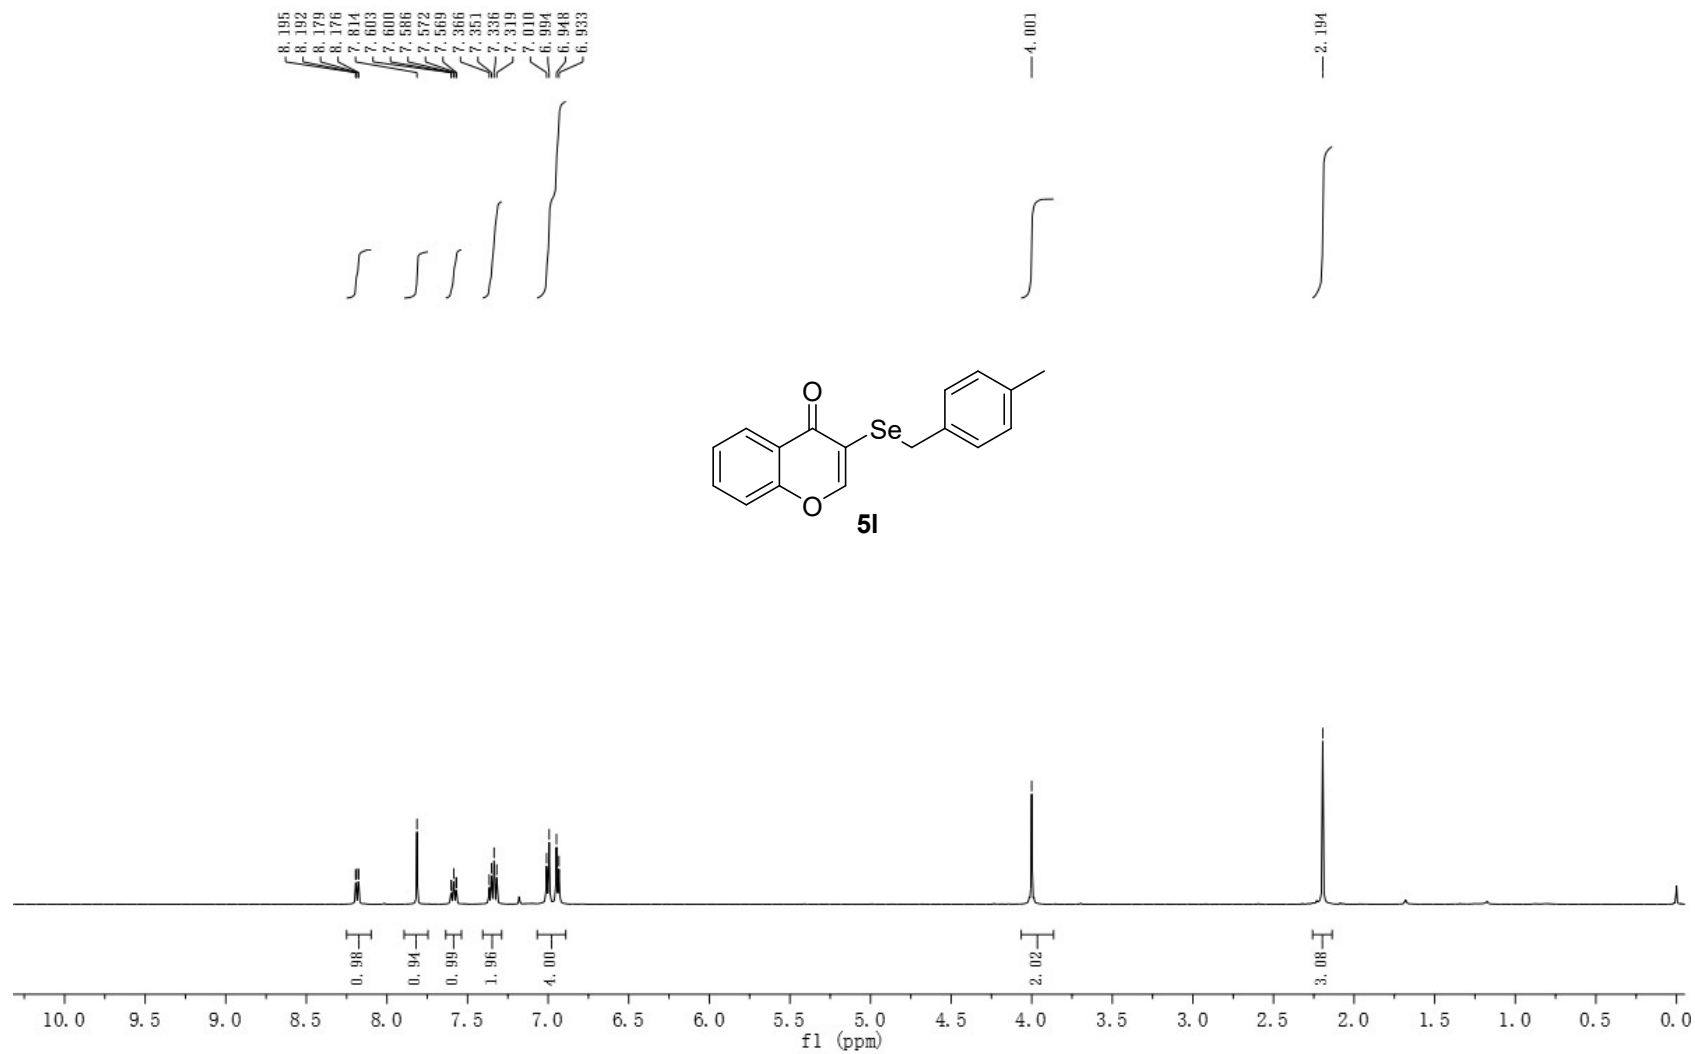

$^{13}\text{C}$  NMR (126 MHz,  $\text{CDCl}_3$ ) of **5I**

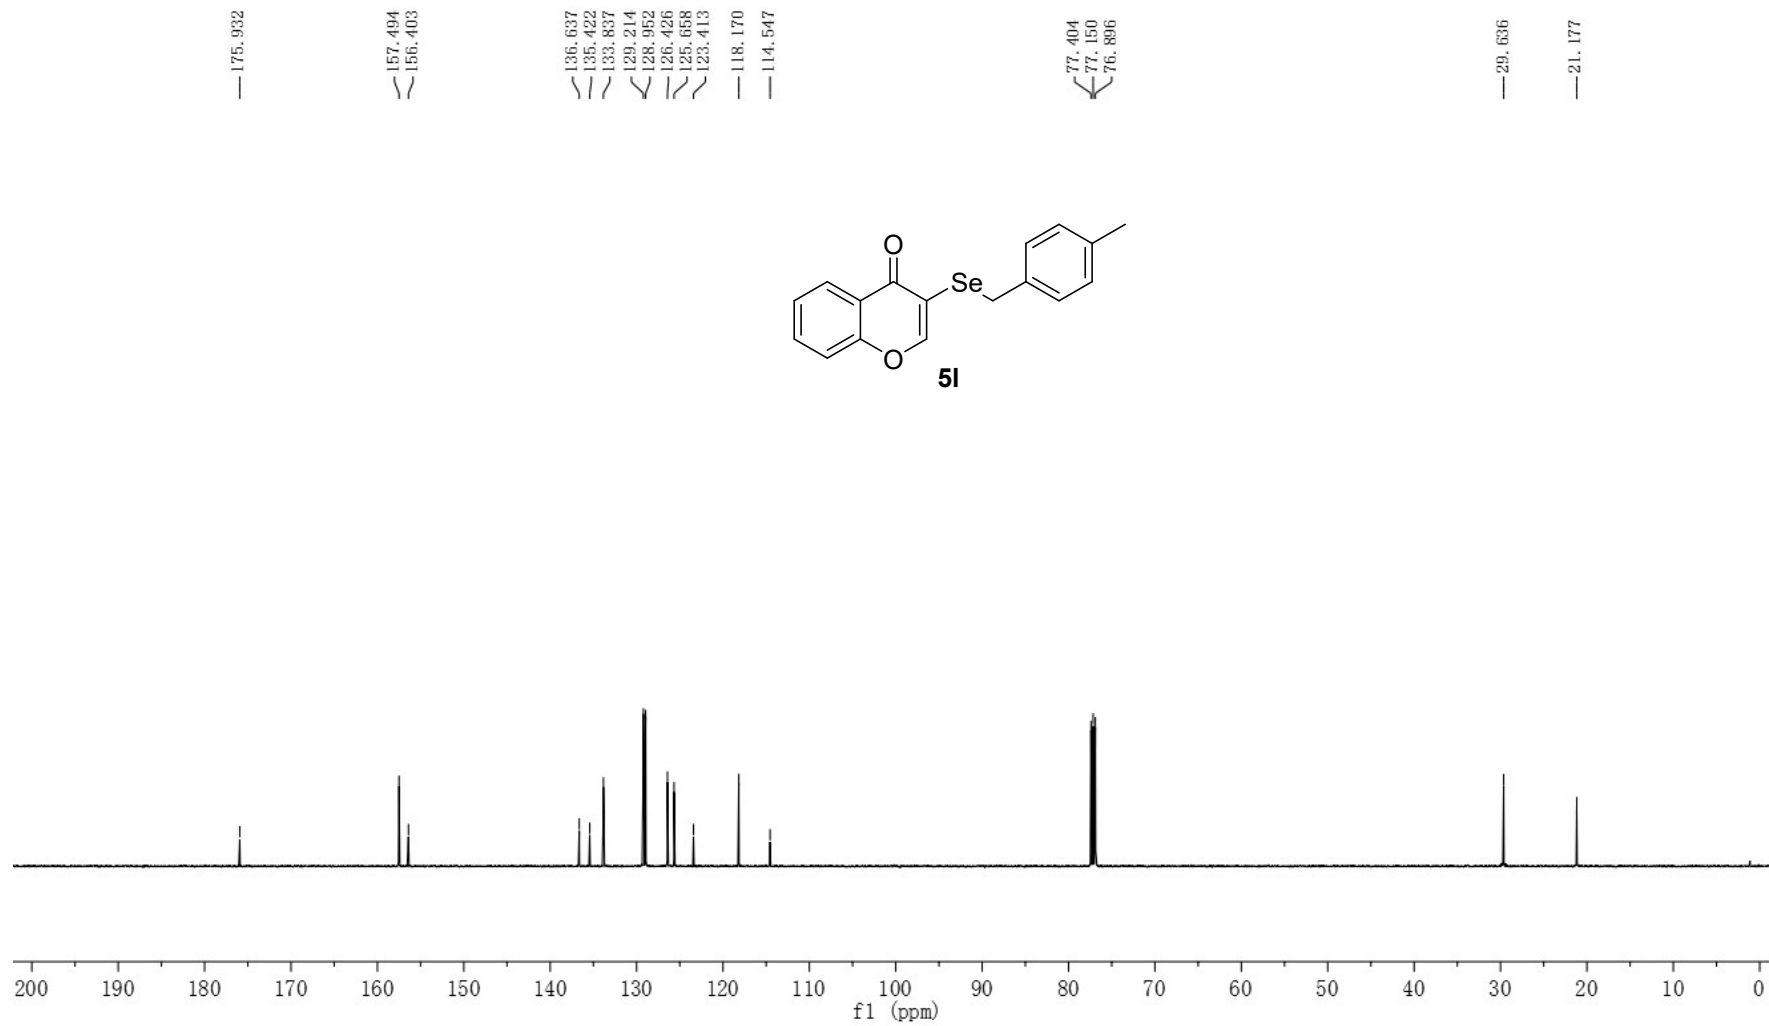

$^1\text{H}$  NMR (500 MHz,  $\text{CDCl}_3$ ) of **5m**

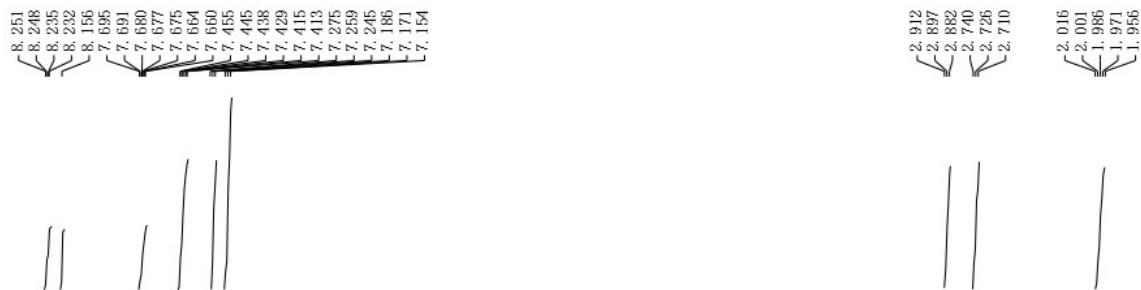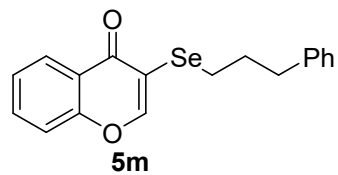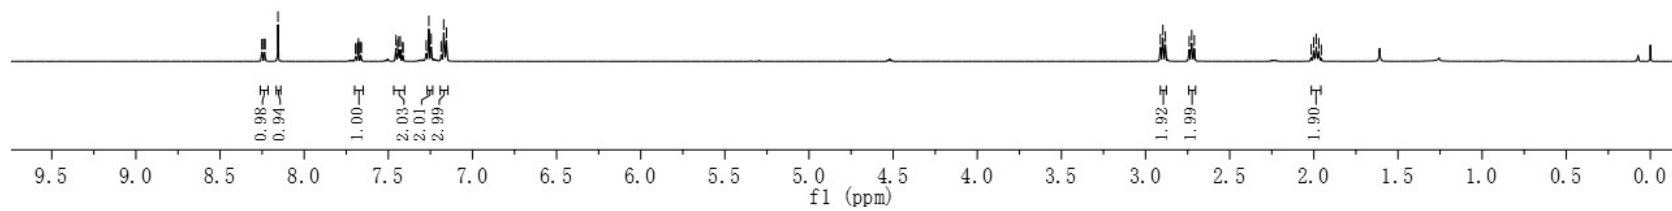

$^{13}\text{C}$  NMR (126 MHz,  $\text{CDCl}_3$ ) of **5m**

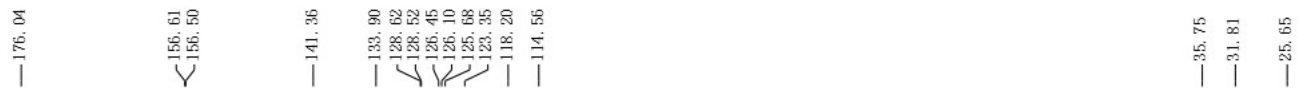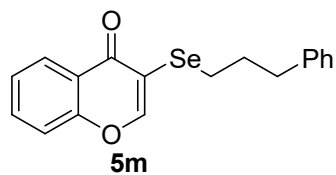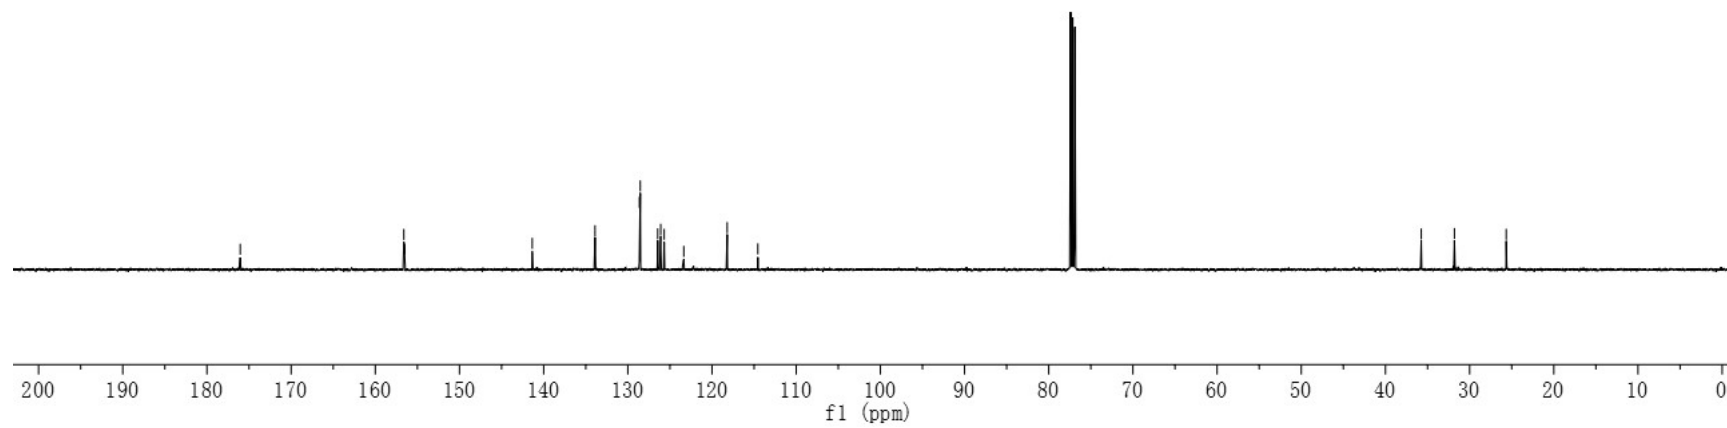

$^1\text{H}$  NMR (500 MHz,  $\text{CDCl}_3$ ) of **5n**

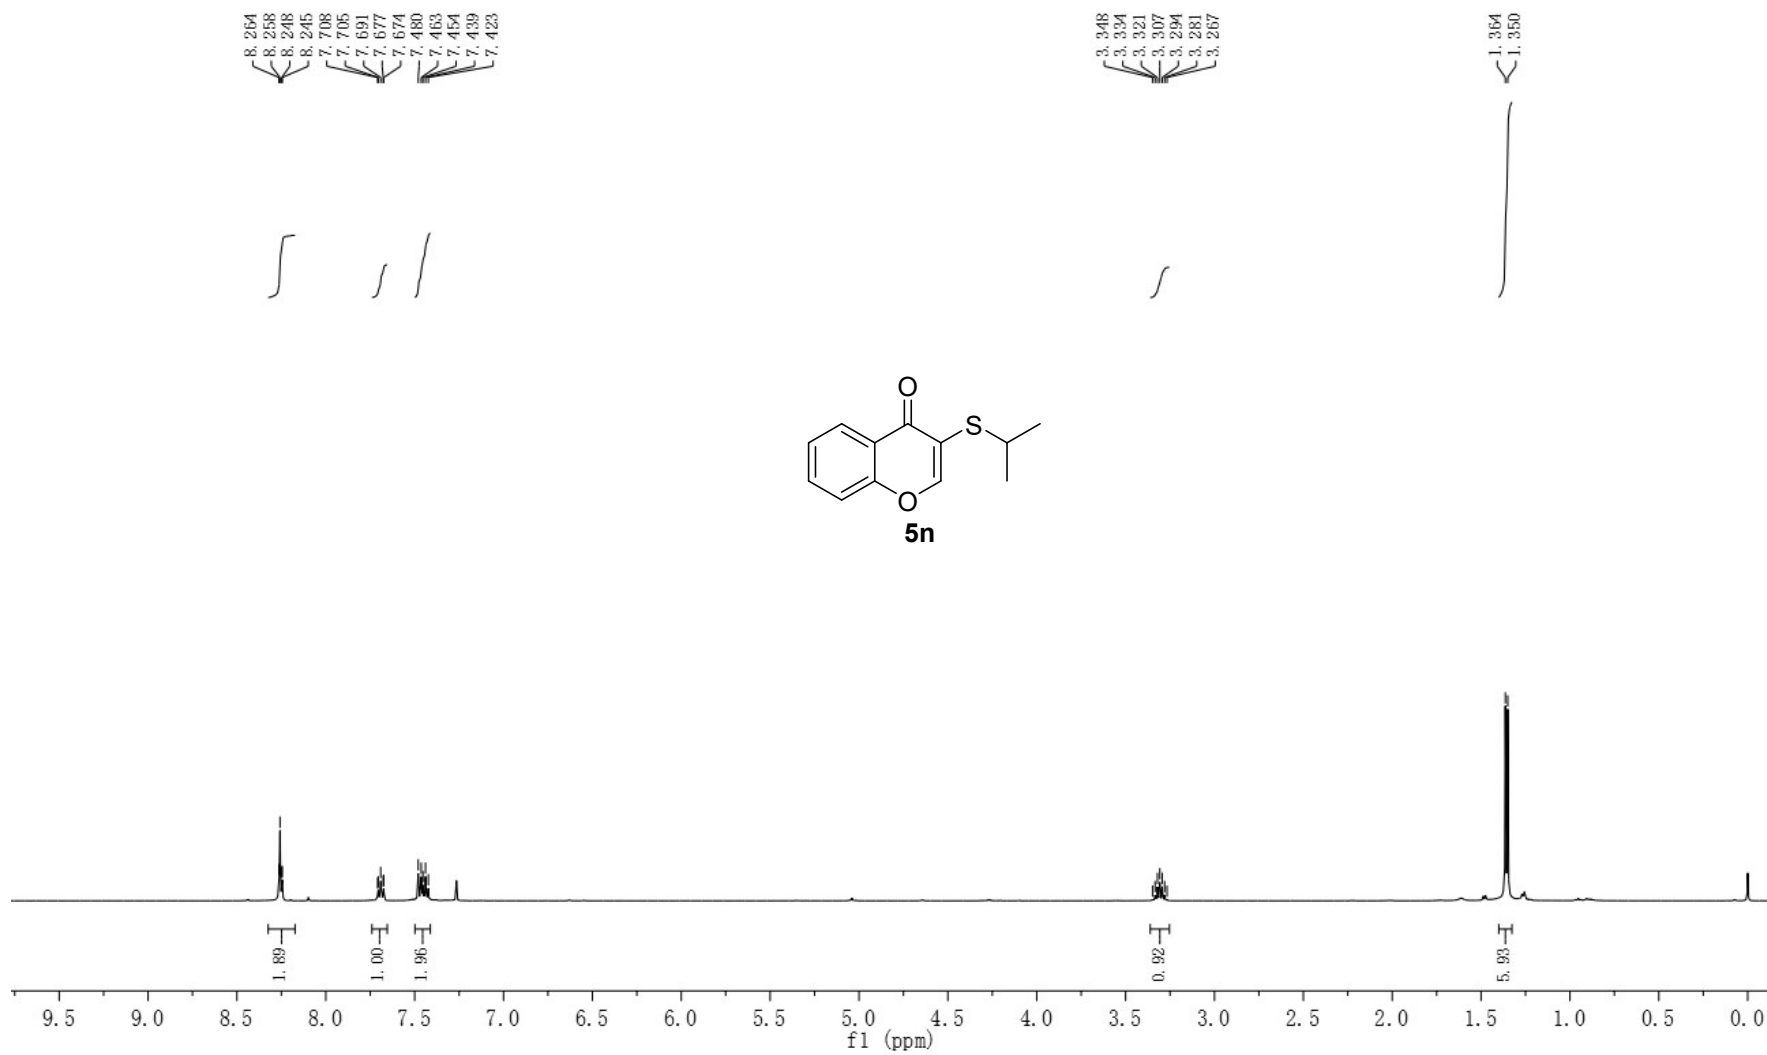



$^{13}\text{C}$  NMR (126 MHz,  $\text{CDCl}_3$ ) of **5n**

— 175.63

— 156.44  
— 155.92

— 134.09

— 126.31

— 125.80

— 123.59

— 123.15

— 118.31

— 77.40

— 77.15

— 76.90

— 41.80

— 22.58

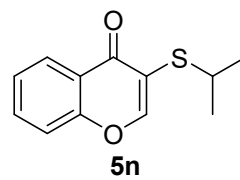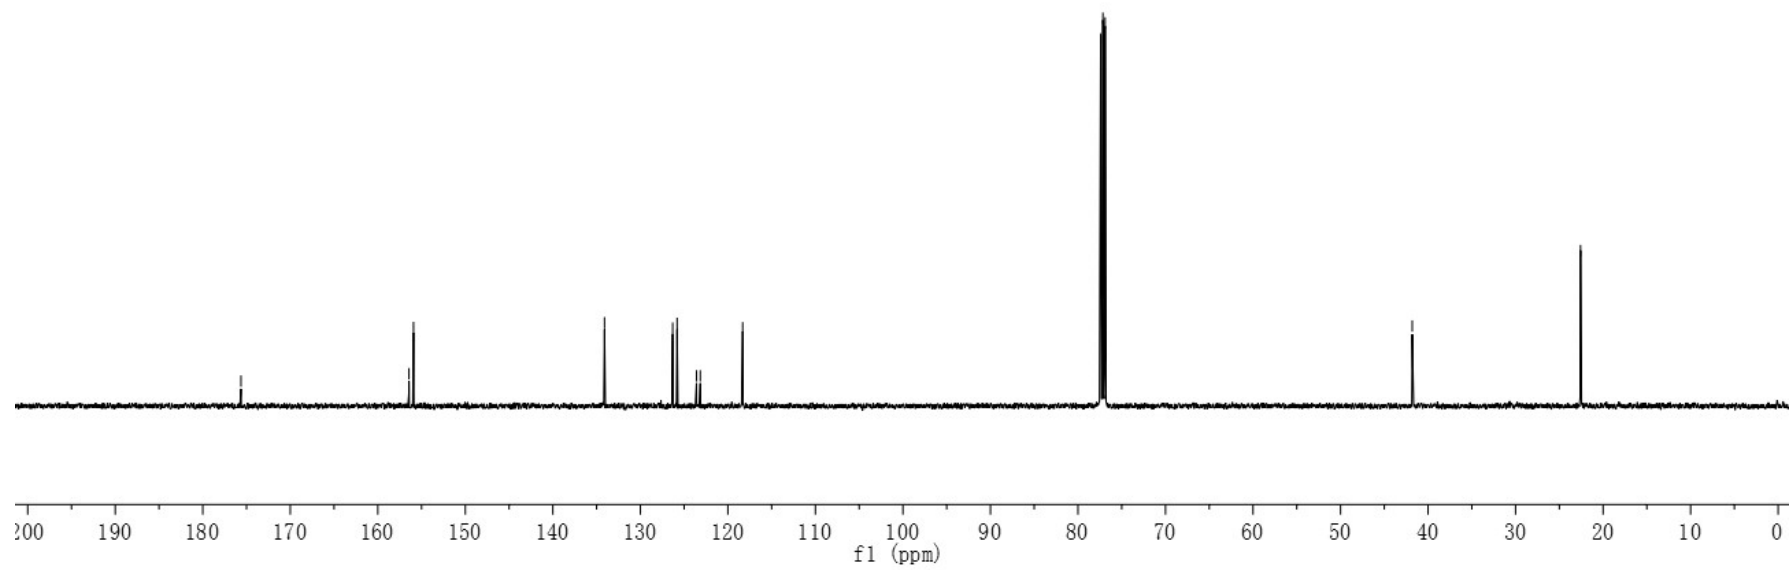

$^1\text{H}$  NMR (500 MHz,  $\text{CDCl}_3$ ) of **5o**

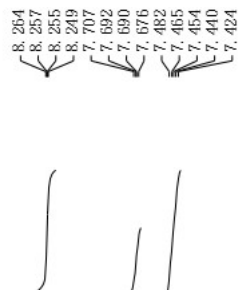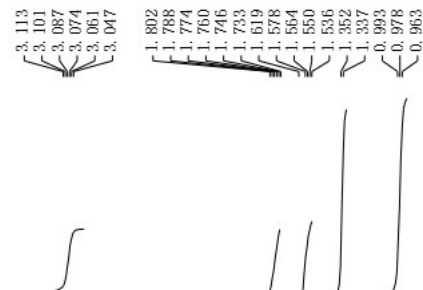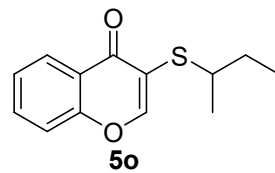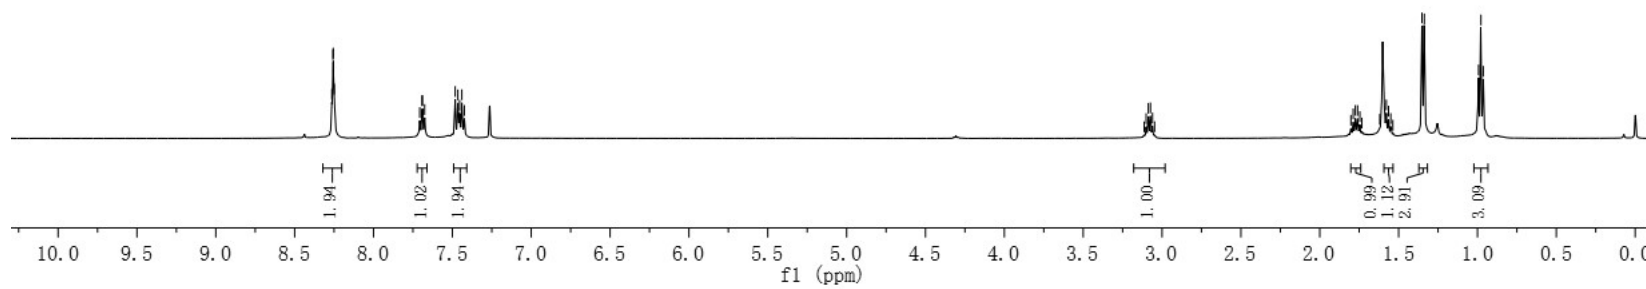

$^{13}\text{C}$  NMR (126 MHz,  $\text{CDCl}_3$ ) of **5o**

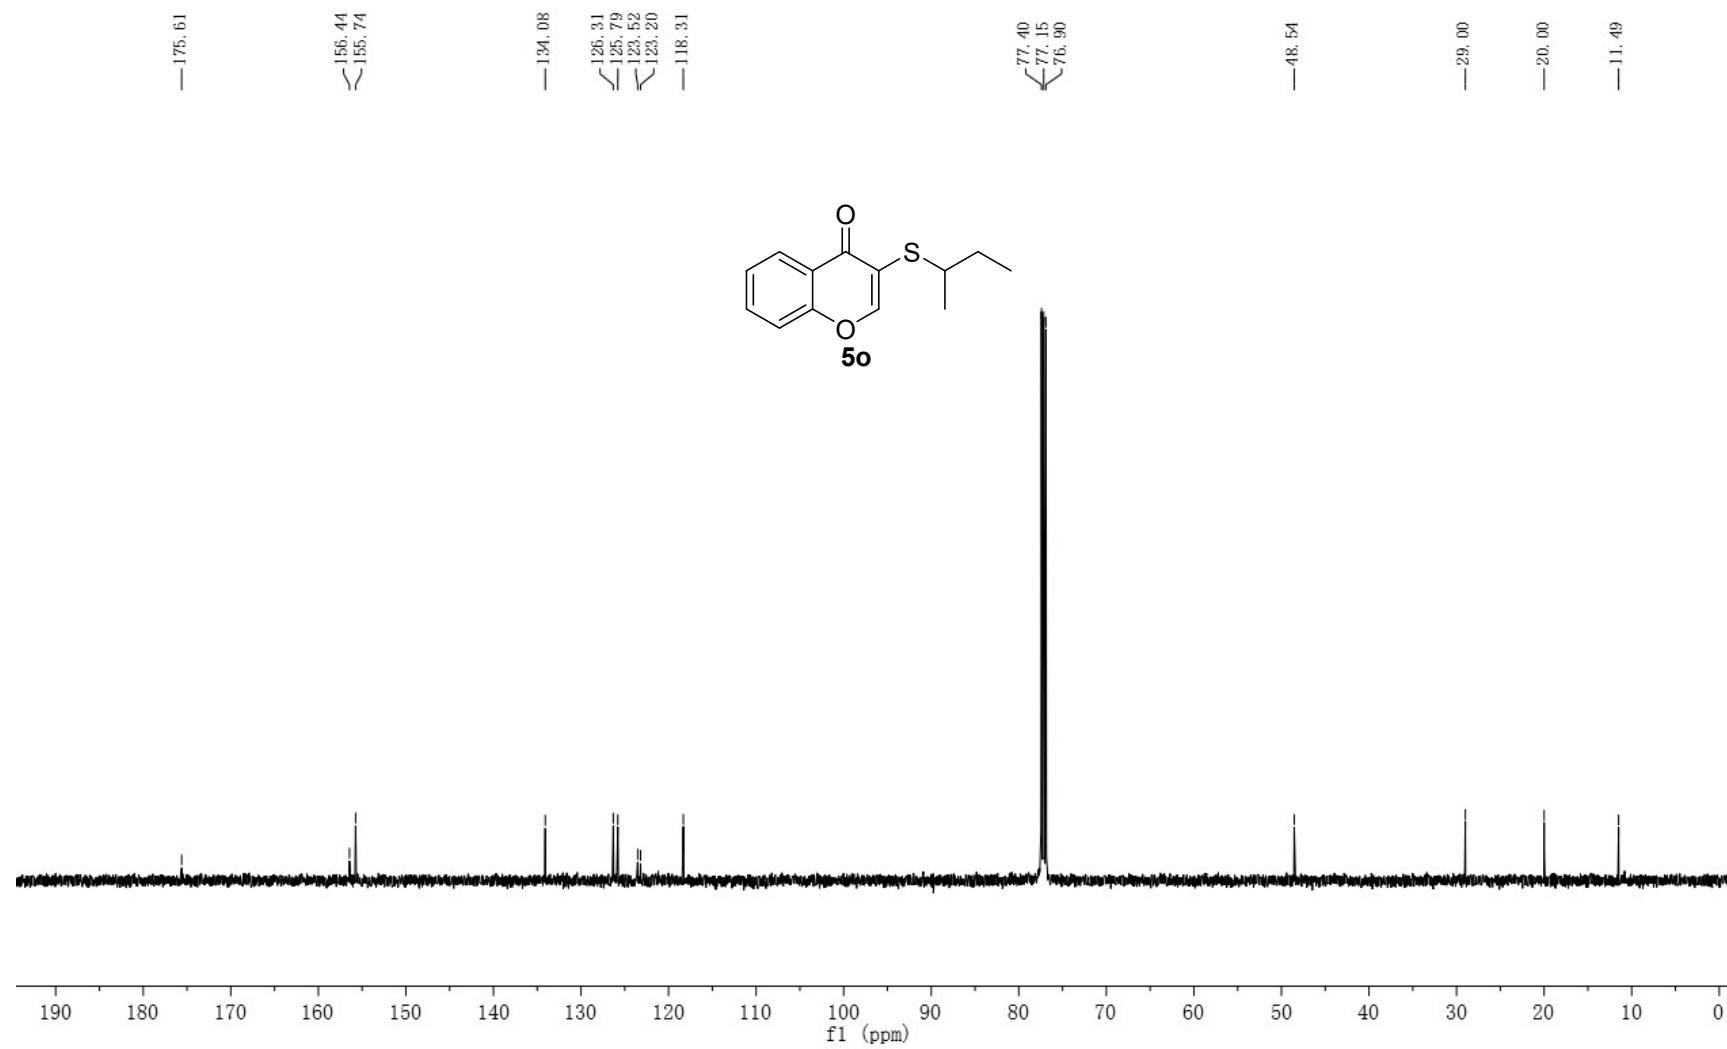

$^1\text{H}$  NMR (500 MHz,  $\text{CDCl}_3$ ) of **5p**

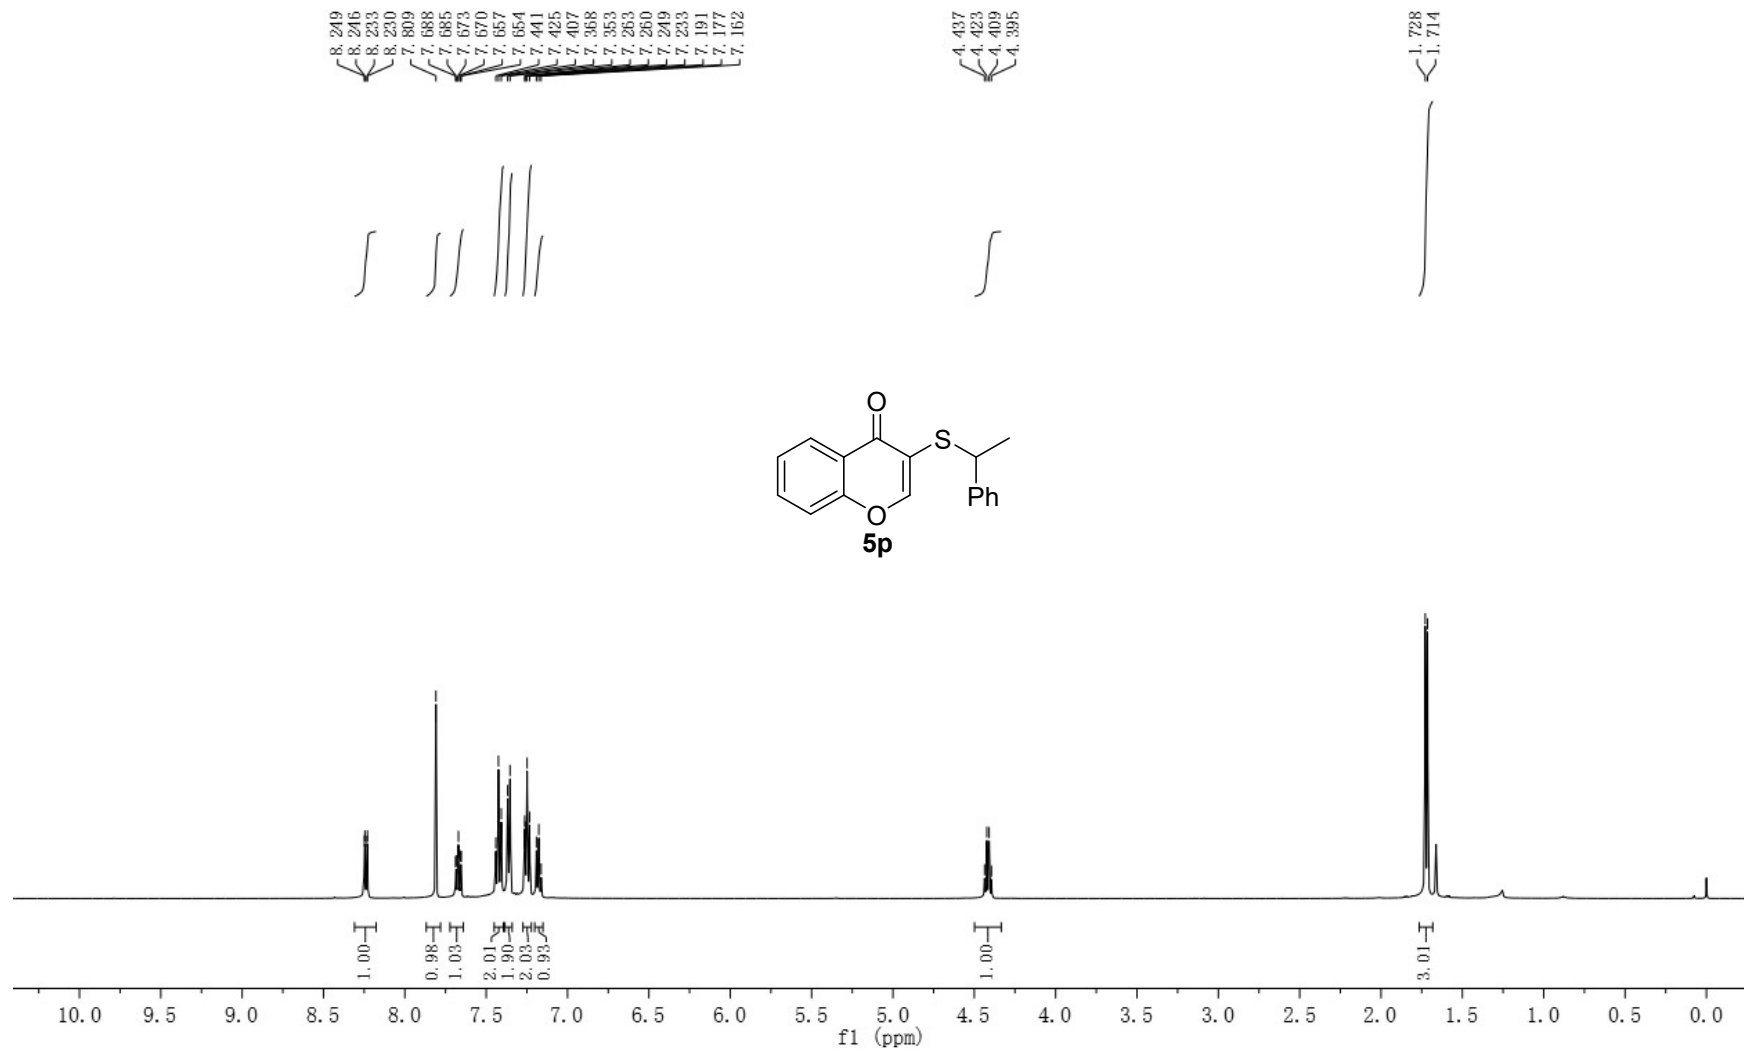

$^{13}\text{C}$  NMR (126 MHz,  $\text{CDCl}_3$ ) of **5p**

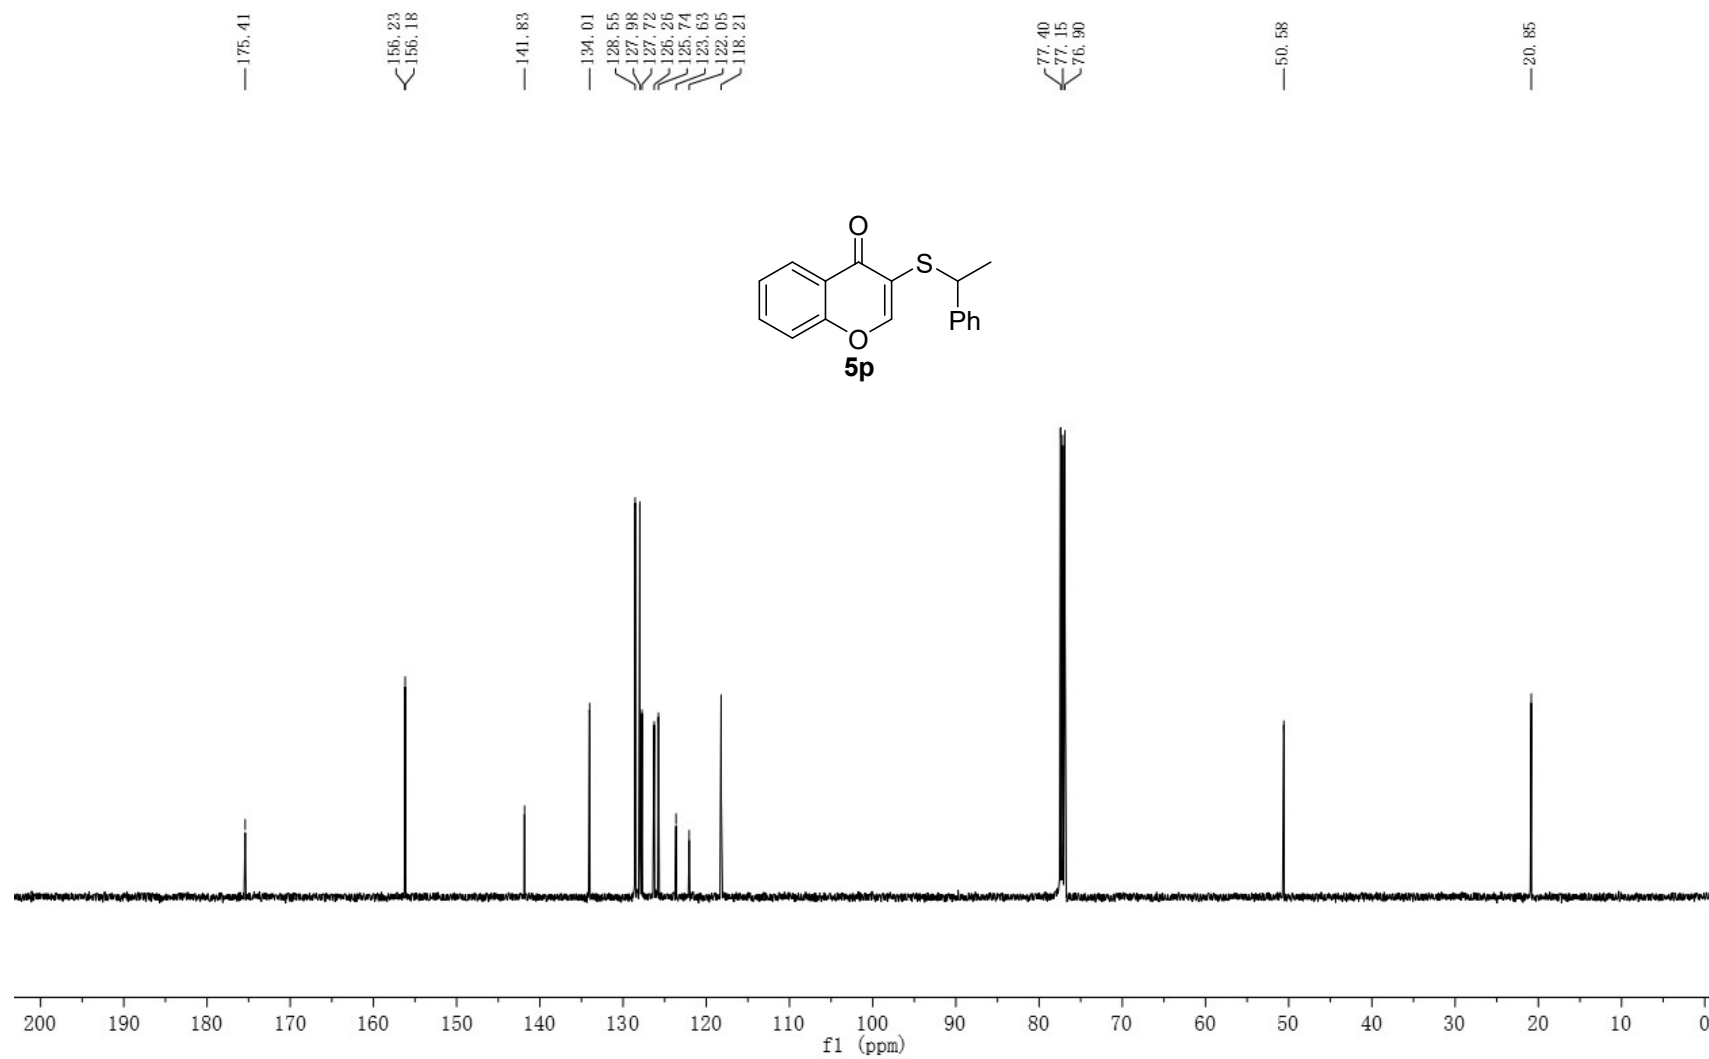

$^1\text{H}$  NMR (500 MHz,  $\text{CDCl}_3$ ) of **5q**

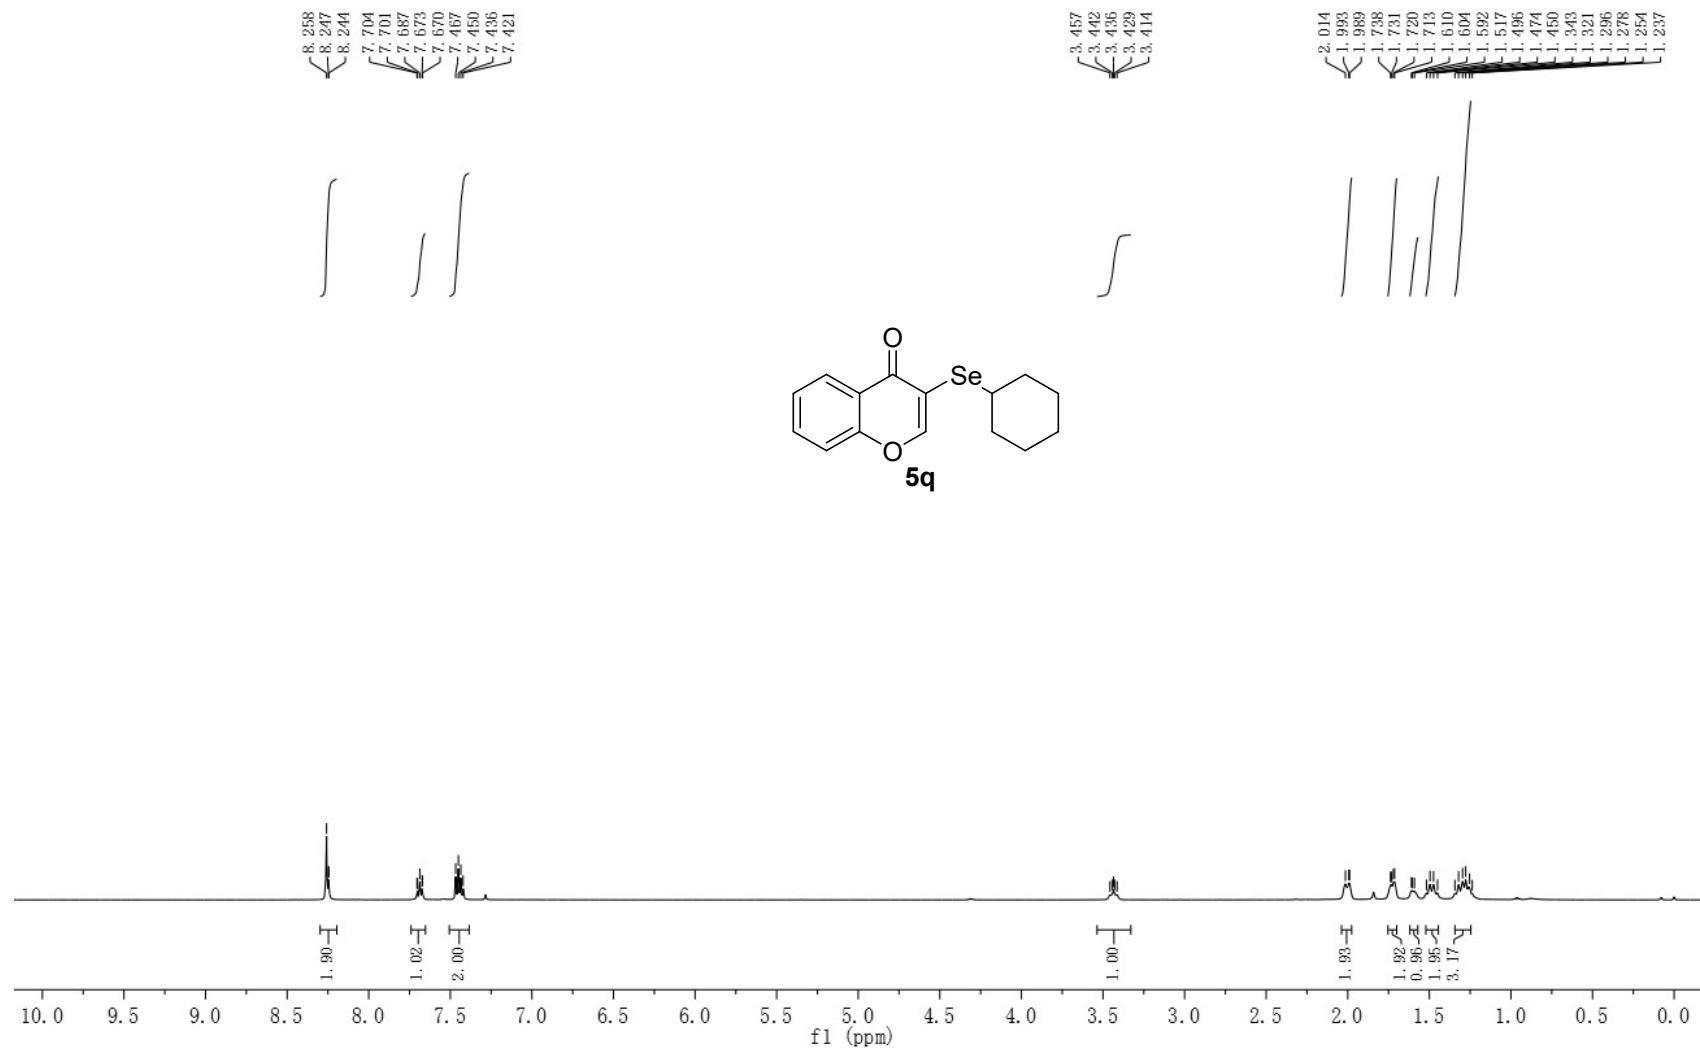

$^{13}\text{C}$  NMR (126 MHz,  $\text{CDCl}_3$ ) of **5q**

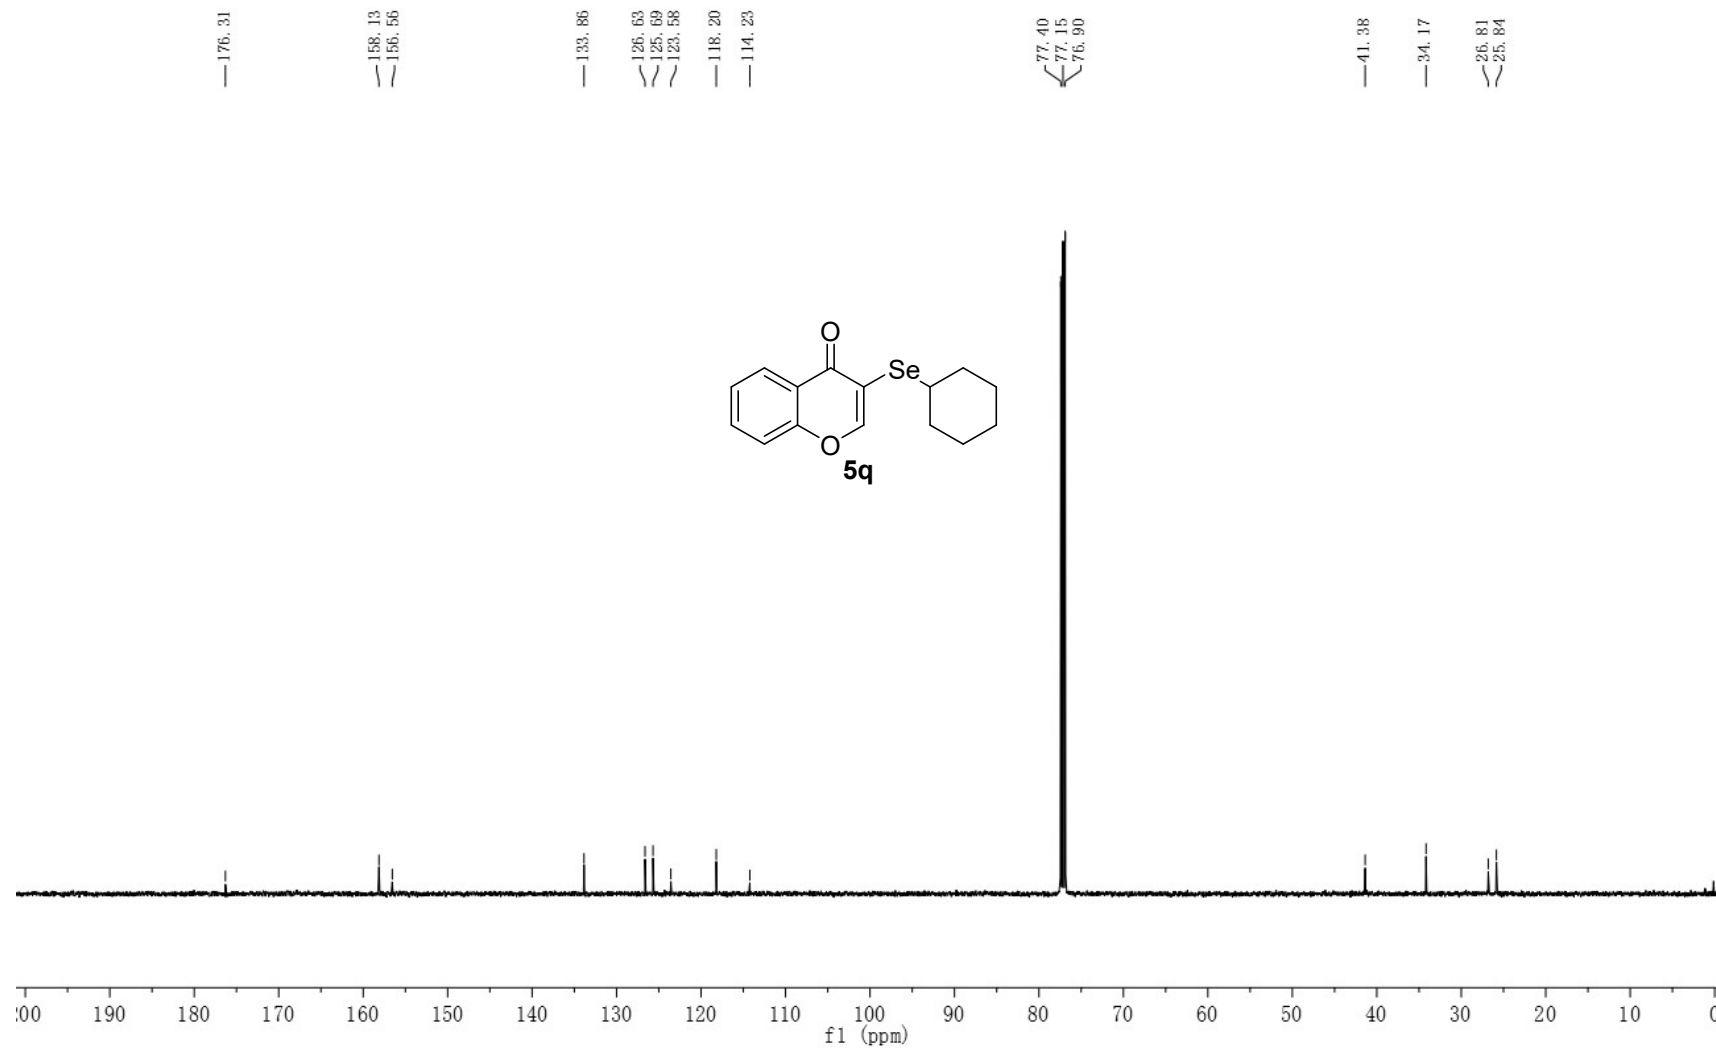

$^1\text{H}$  NMR (500 MHz,  $\text{CDCl}_3$ ) of **5r**

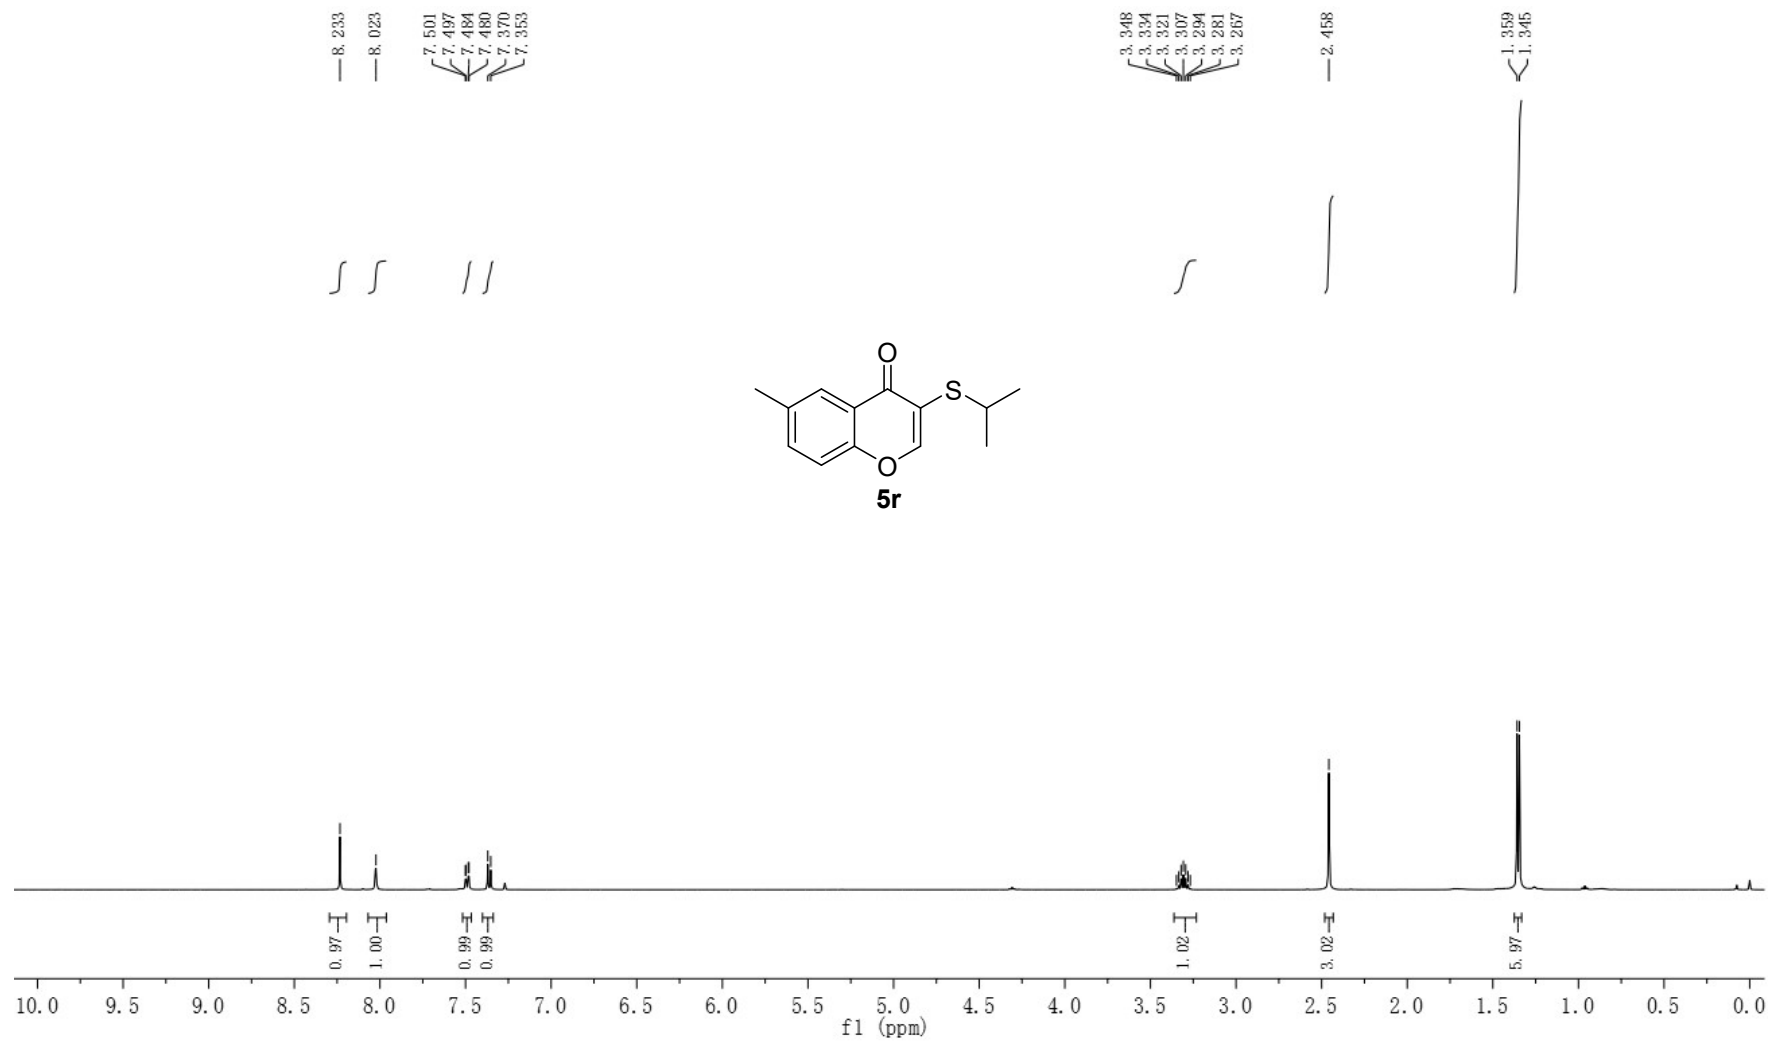



$^{13}\text{C}$  NMR (126 MHz,  $\text{CDCl}_3$ ) of **5r**

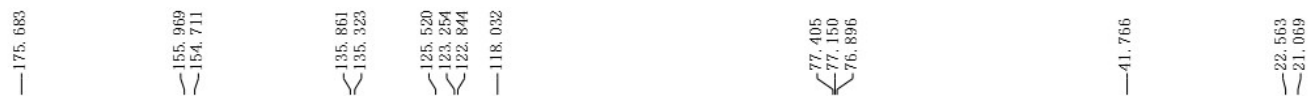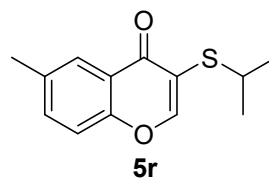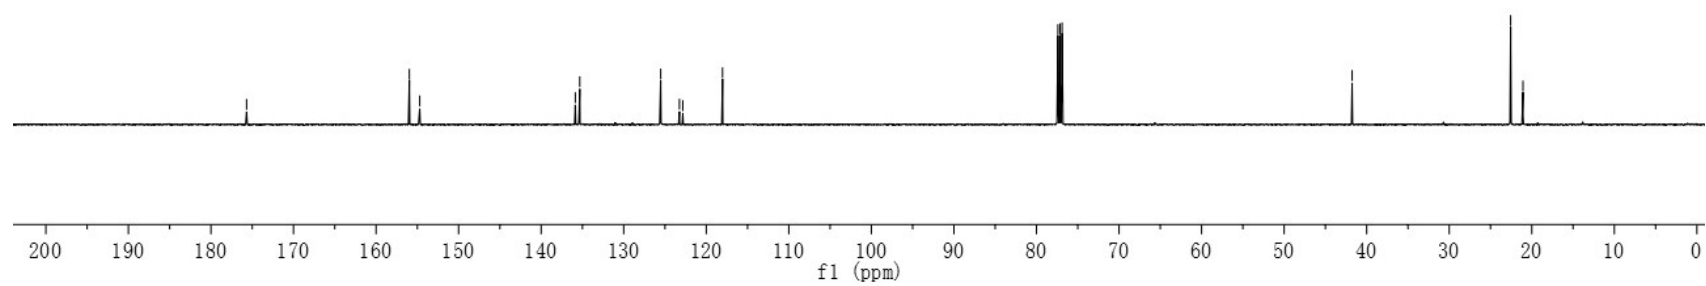

$^1\text{H}$  NMR (500 MHz,  $\text{CDCl}_3$ ) of **5s**

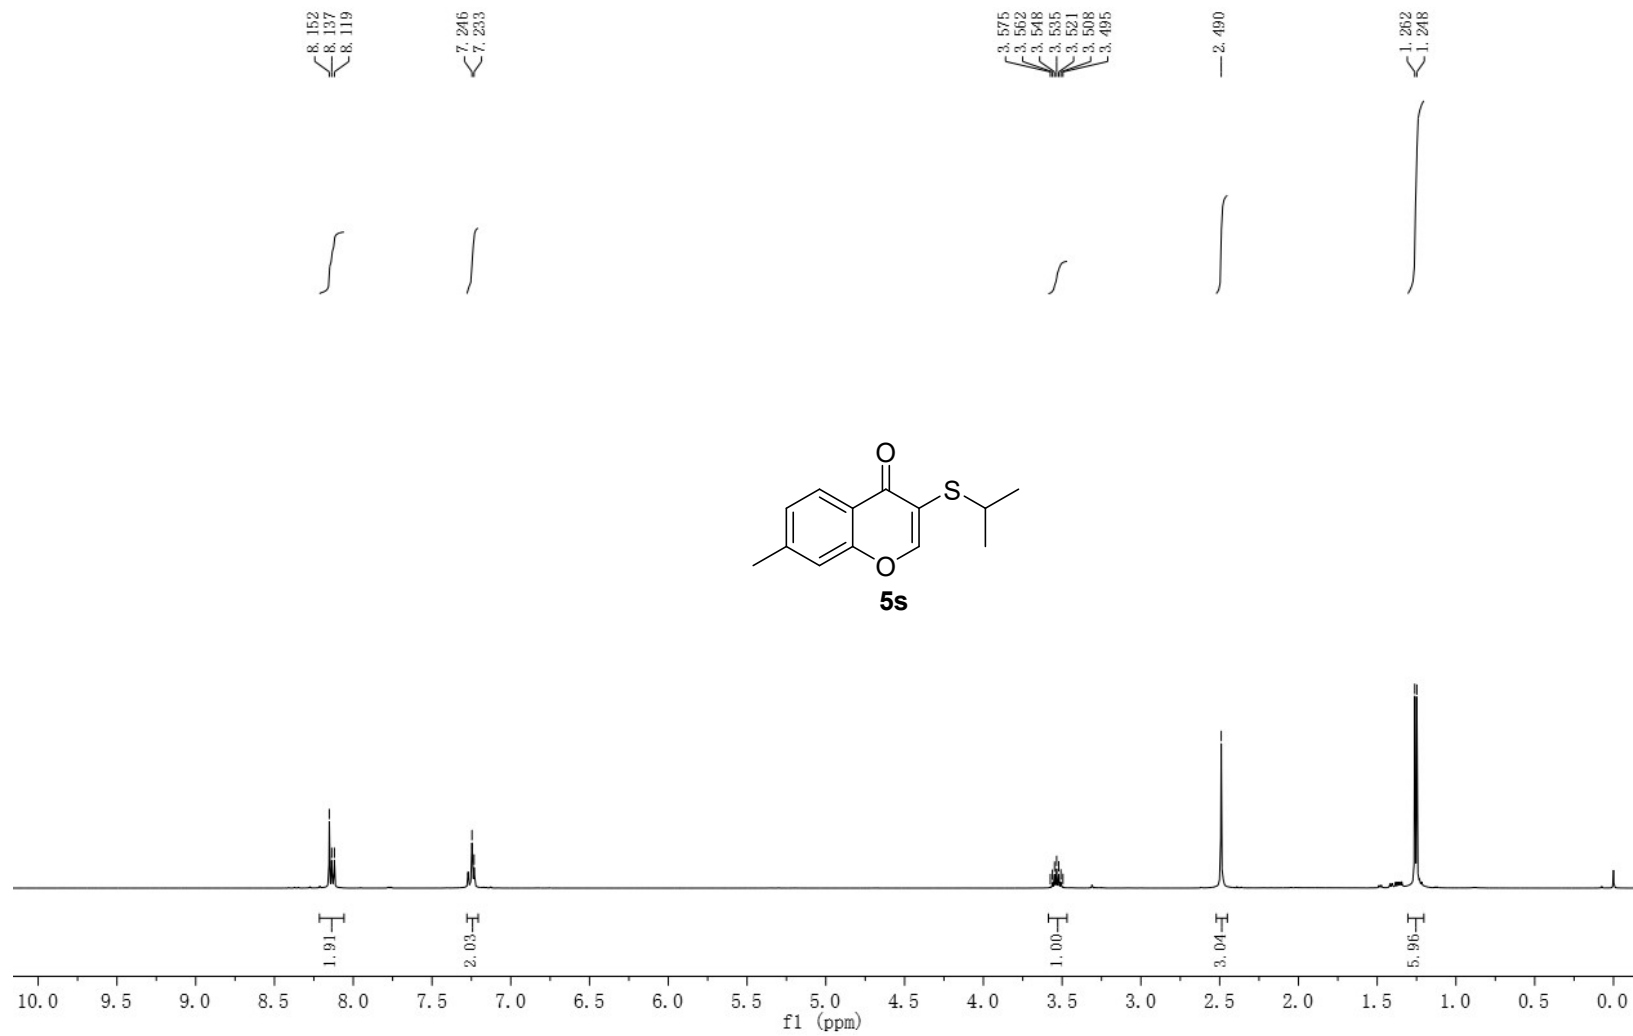

$^{13}\text{C}$  NMR (126 MHz,  $\text{CDCl}_3$ ) of **5s**

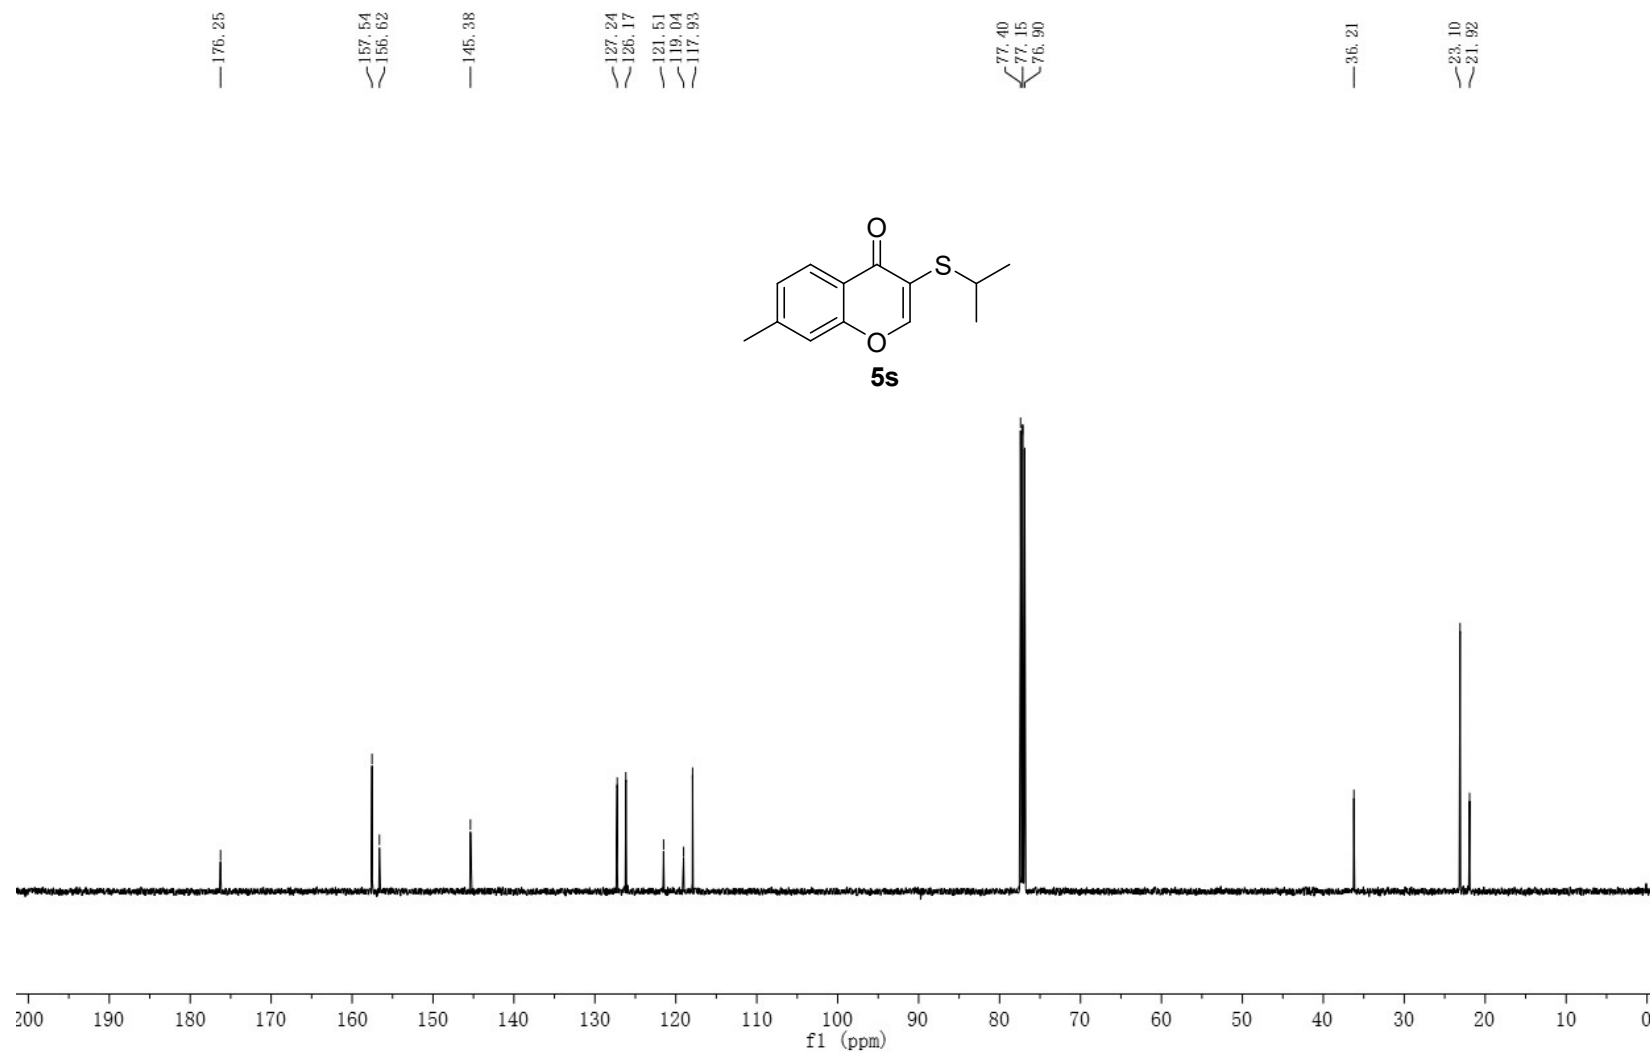

$^1\text{H}$  NMR (500 MHz,  $\text{CDCl}_3$ ) of **5t**

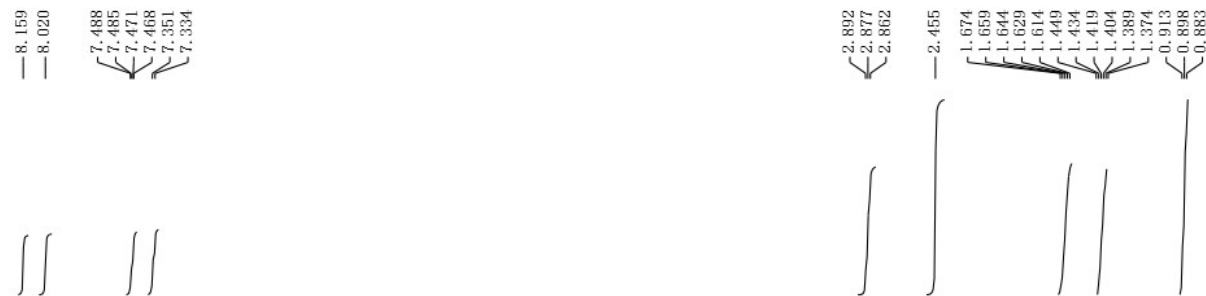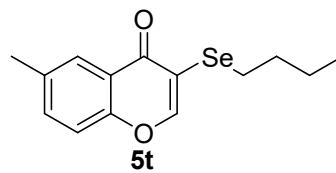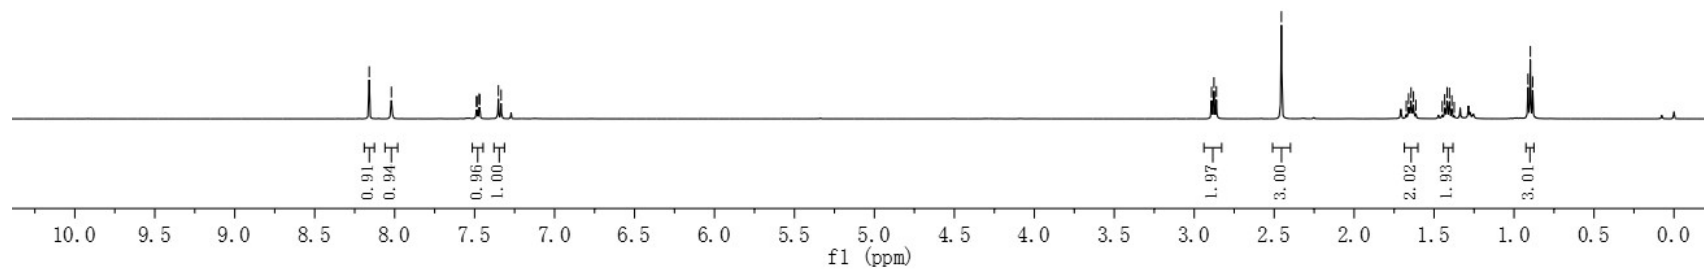

$^{13}\text{C}$  NMR (126 MHz,  $\text{CDCl}_3$ ) of **5t**

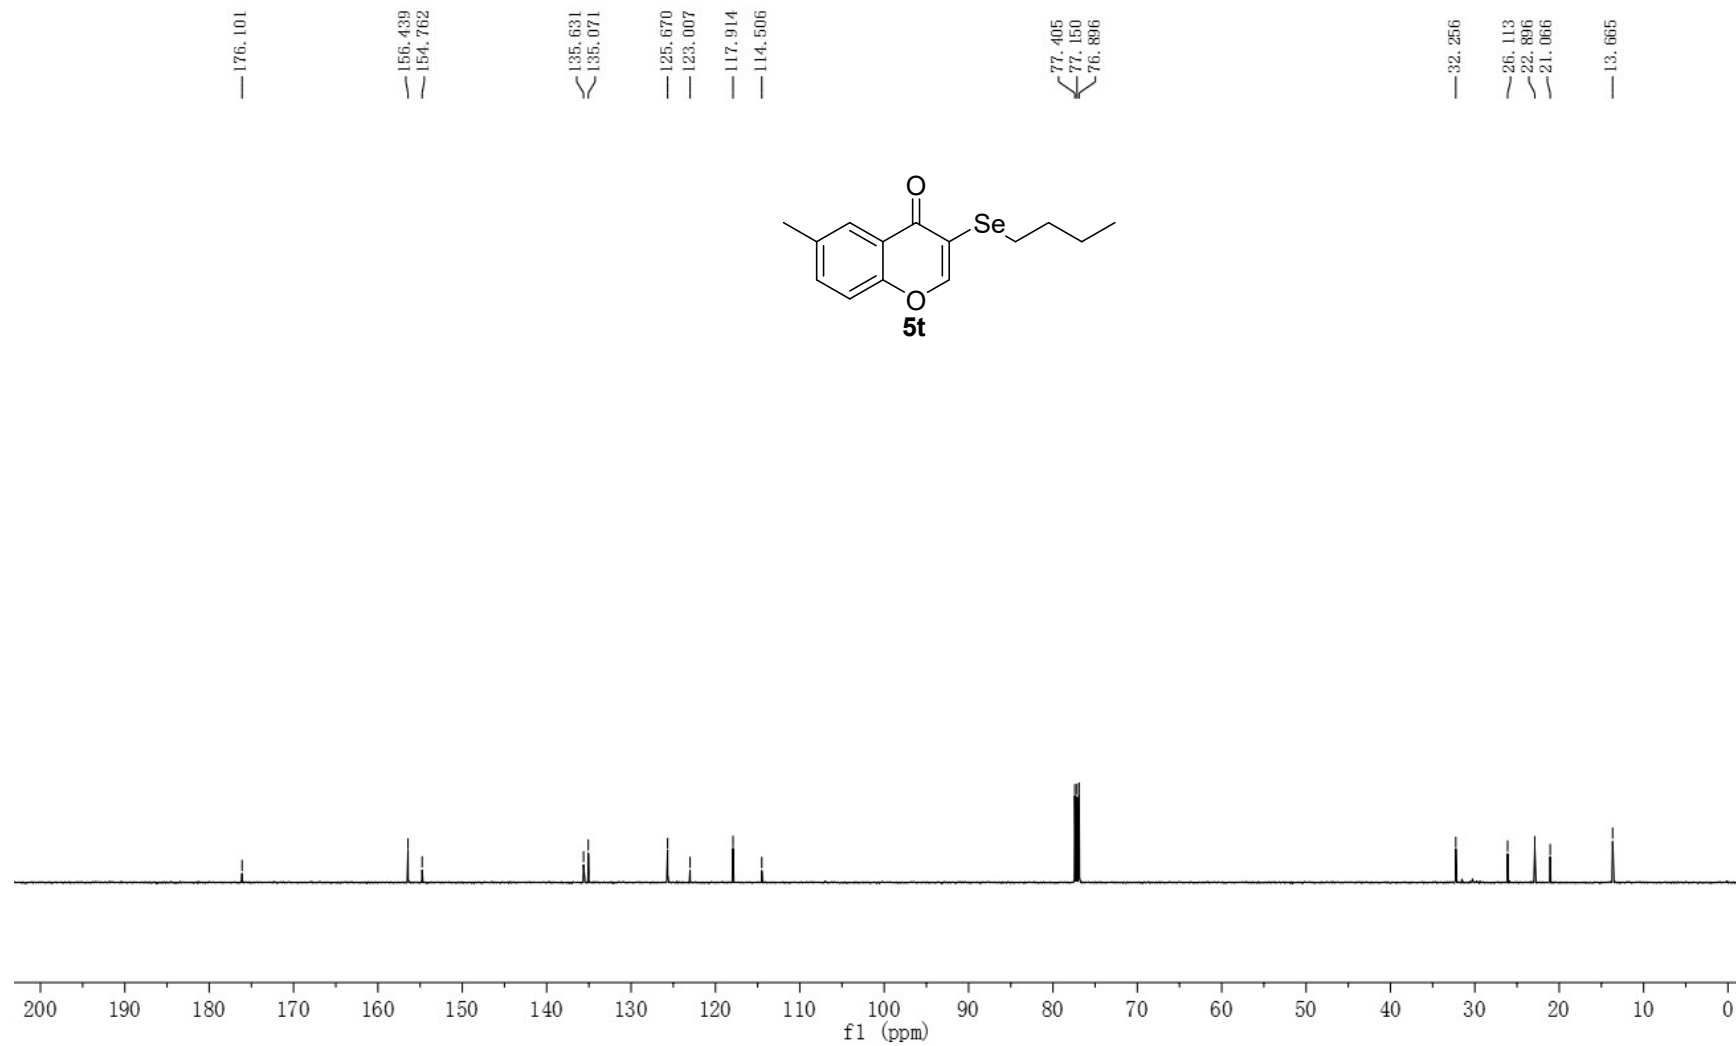

$^1\text{H}$  NMR (500 MHz,  $\text{CDCl}_3$ ) of **5u**

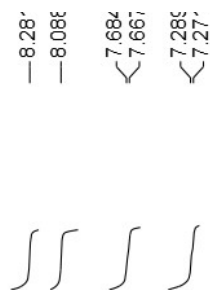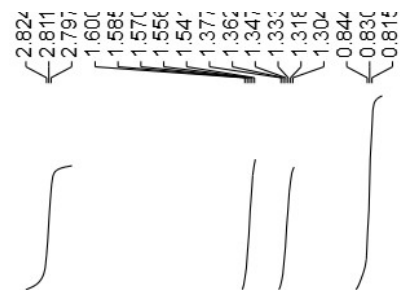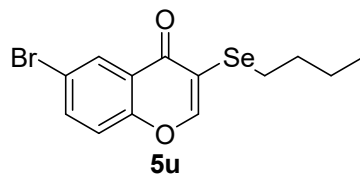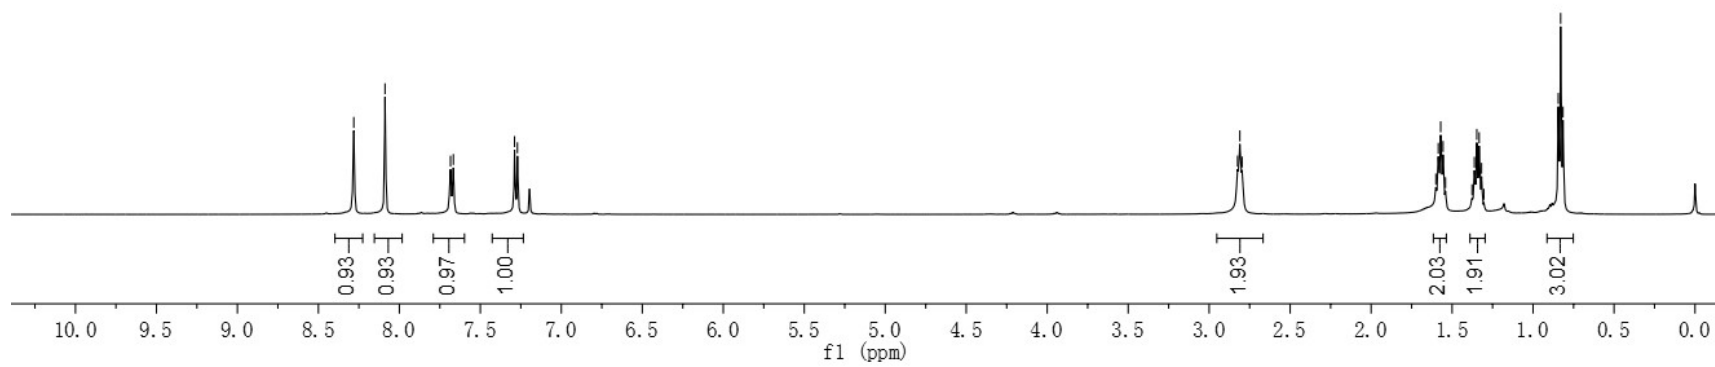

$^{13}\text{C}$  NMR (126 MHz,  $\text{CDCl}_3$ ) of **5u**

— 174.80

— 156.30  
— 155.20

— 136.84

— 128.97  
— 124.48  
— 120.18  
— 118.98  
— 115.10

— 77.40  
— 77.15  
— 76.90

— 32.23

— 26.16  
— 22.90

— 13.66

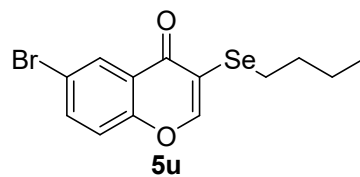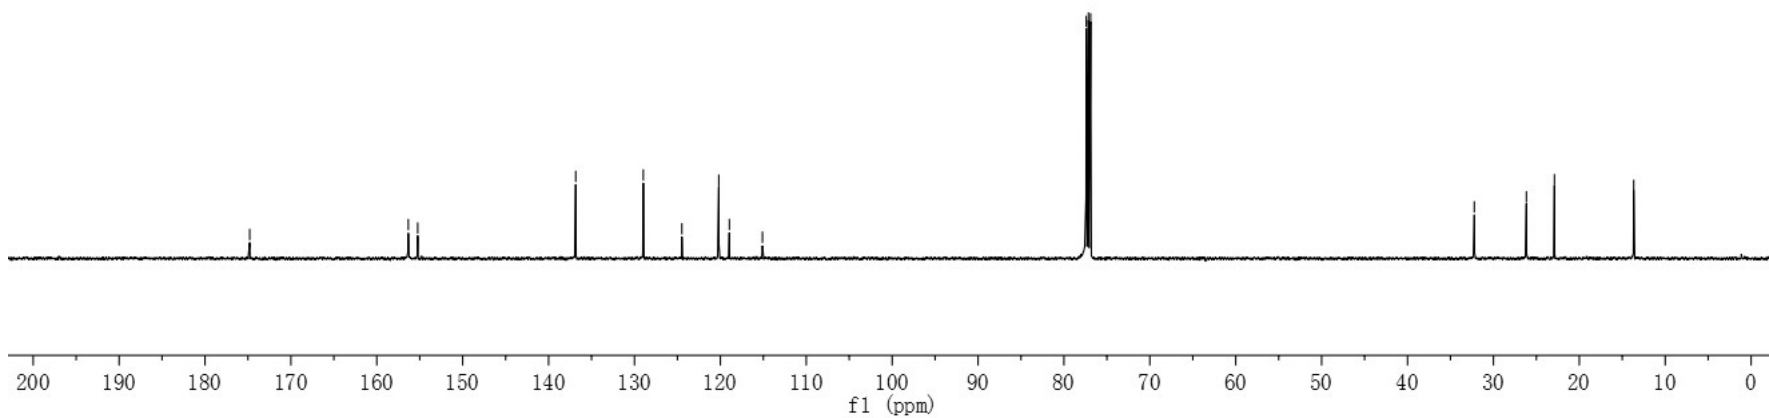

$^1\text{H}$  NMR (500 MHz,  $\text{CDCl}_3$ ) of **5v**

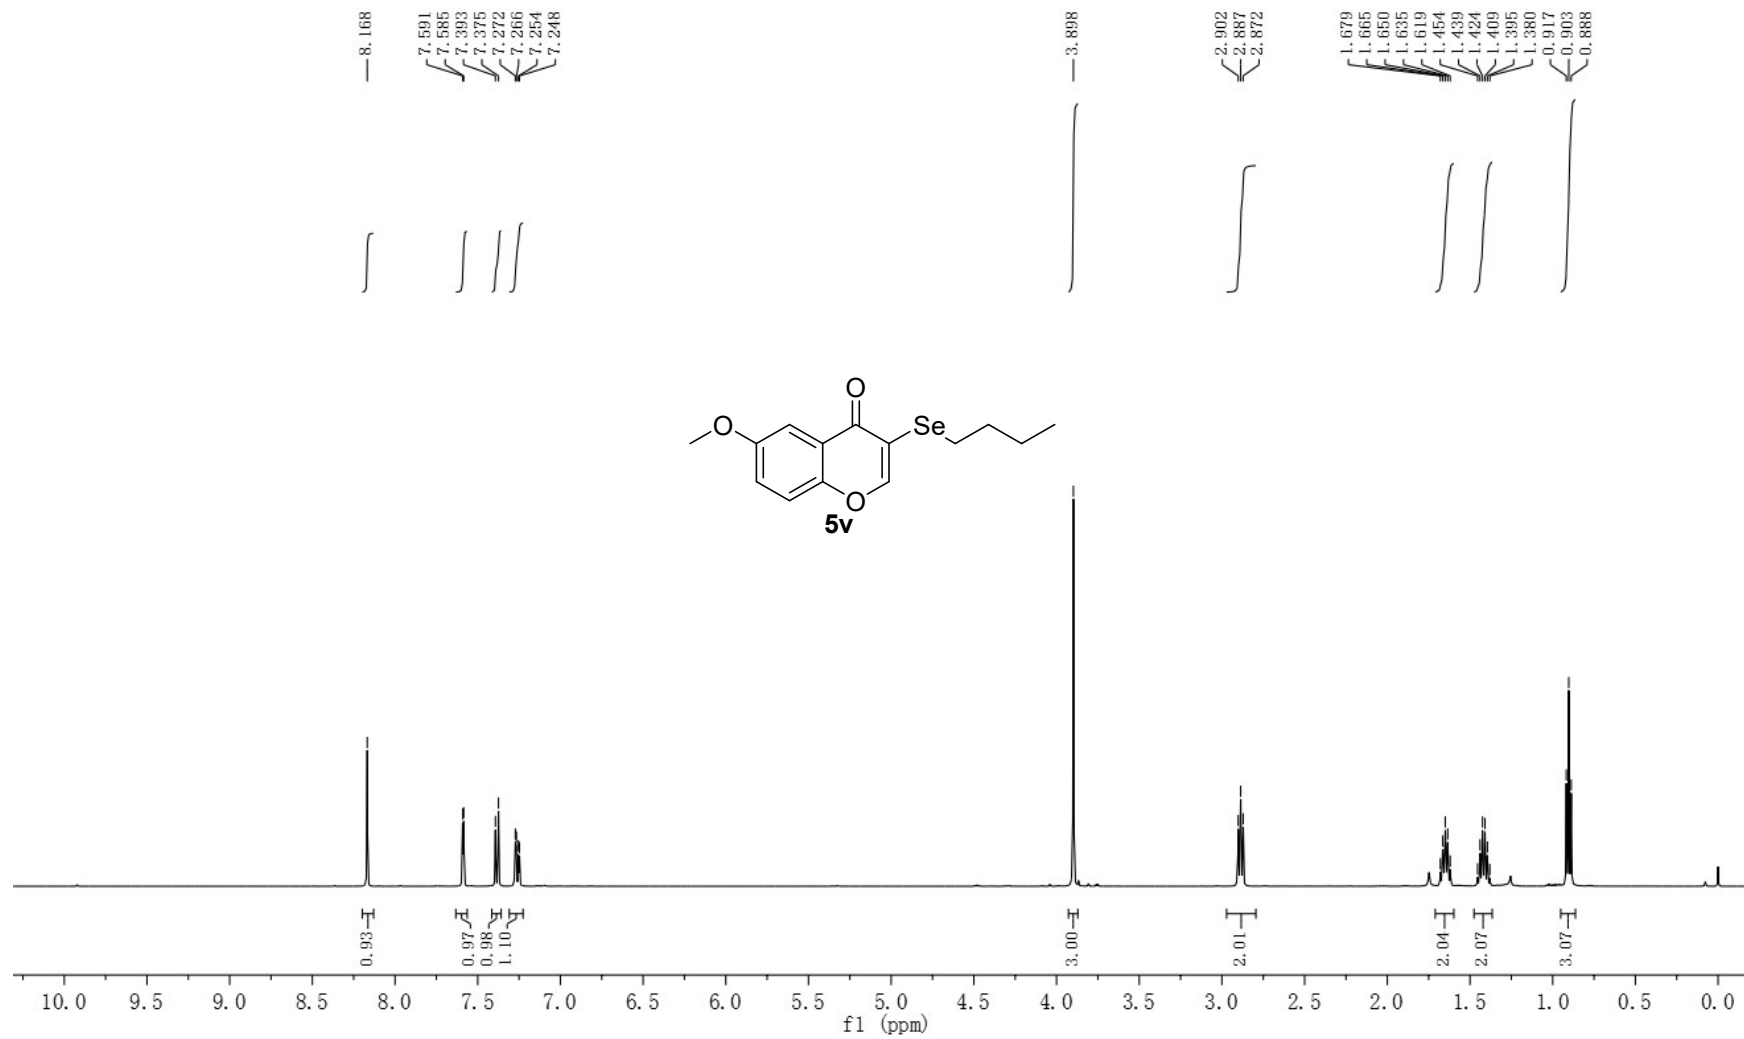



$^{13}\text{C}$  NMR (126 MHz,  $\text{CDCl}_3$ ) of **5v**

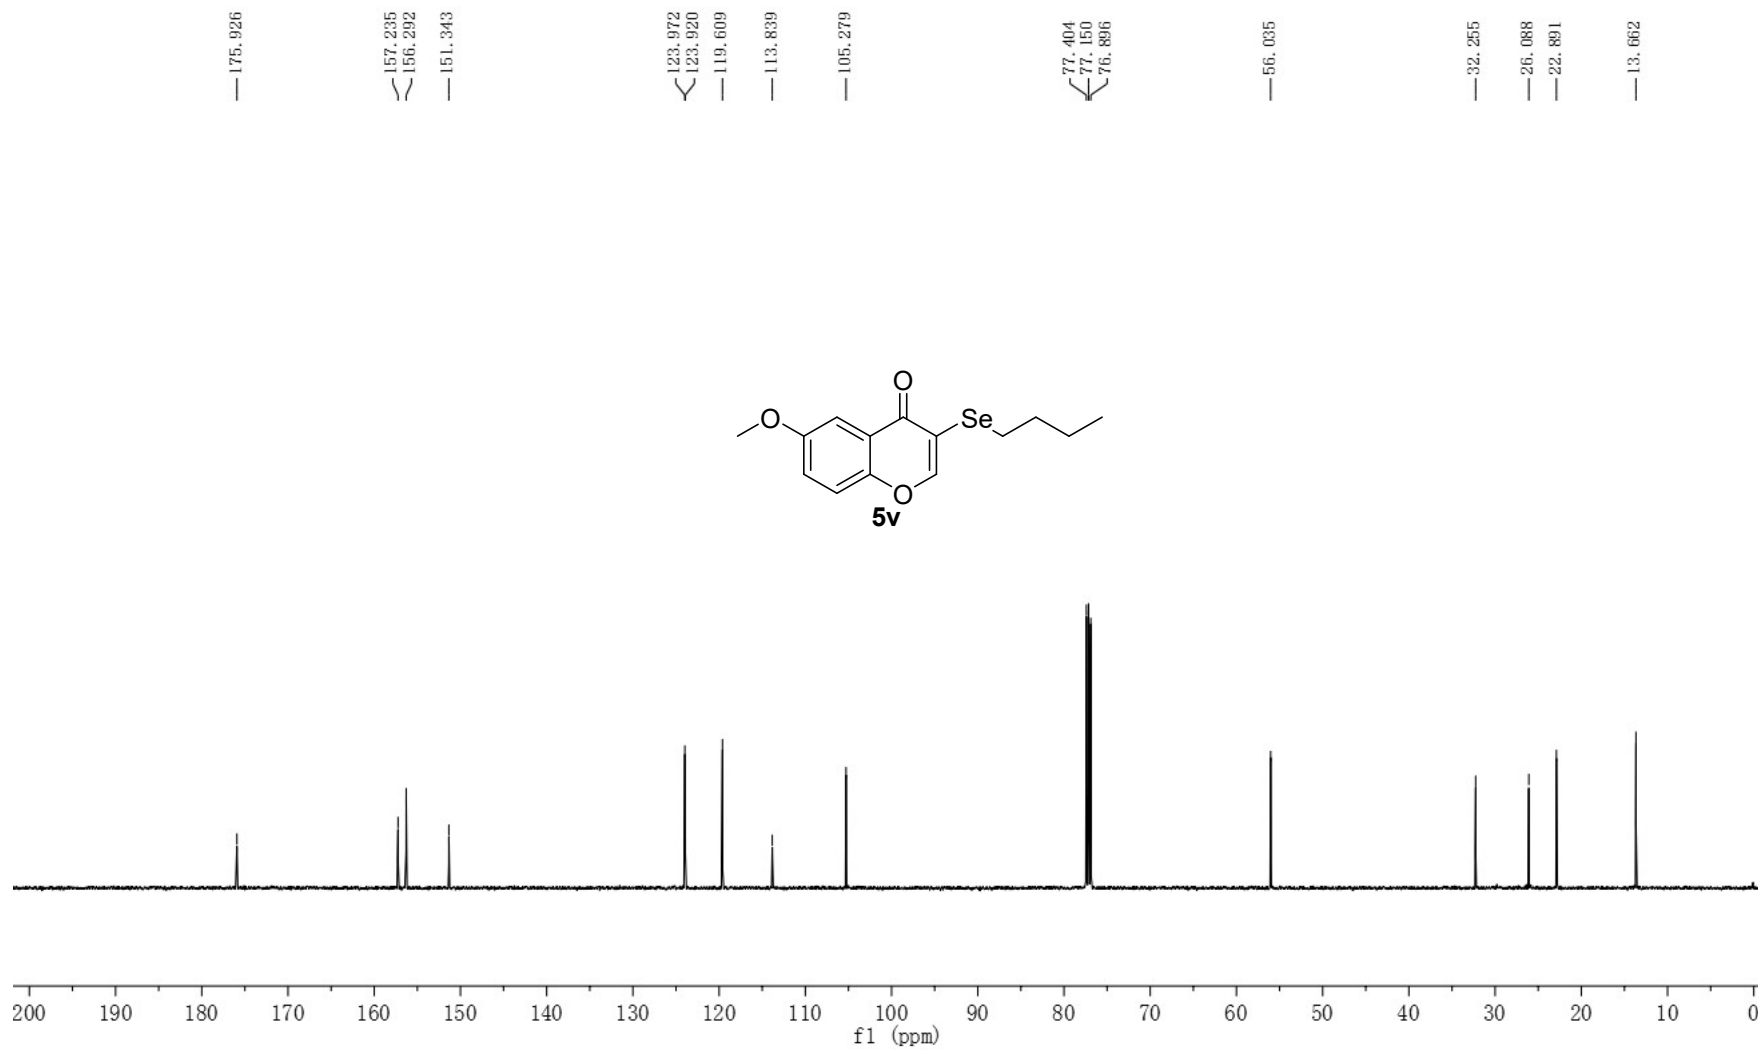

$^1\text{H}$  NMR (500 MHz,  $\text{CDCl}_3$ ) of **5w**

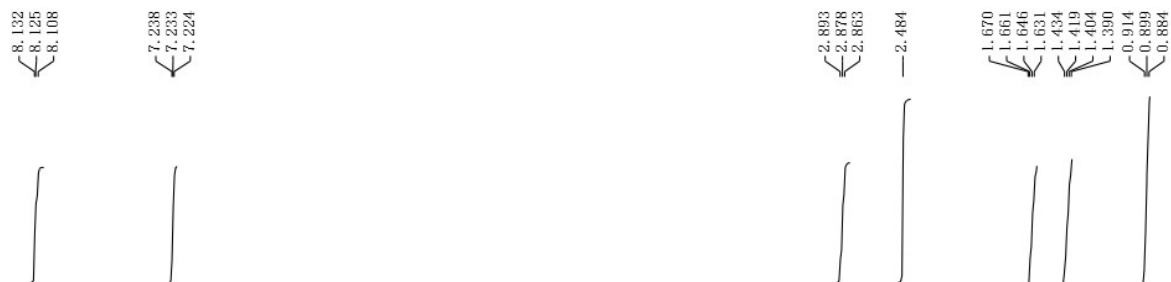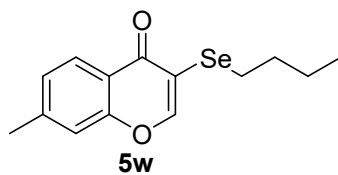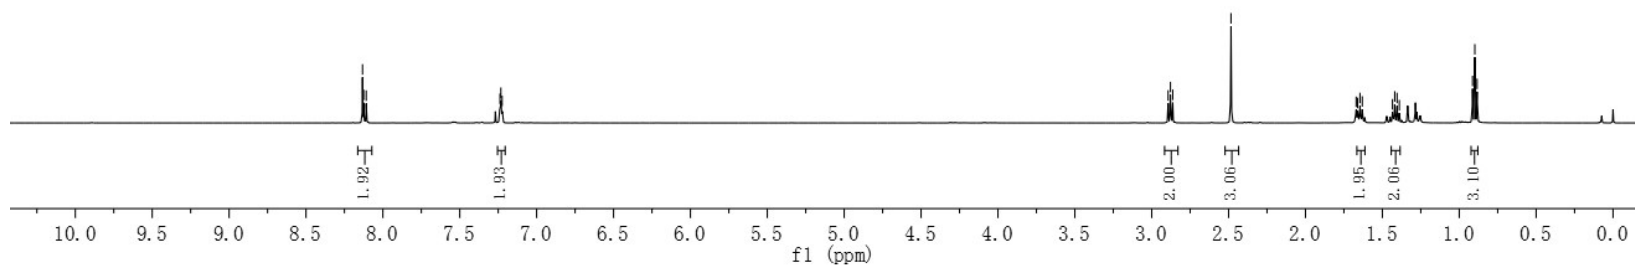

$^{13}\text{C}$  NMR (126 MHz,  $\text{CDCl}_3$ ) of **5w**

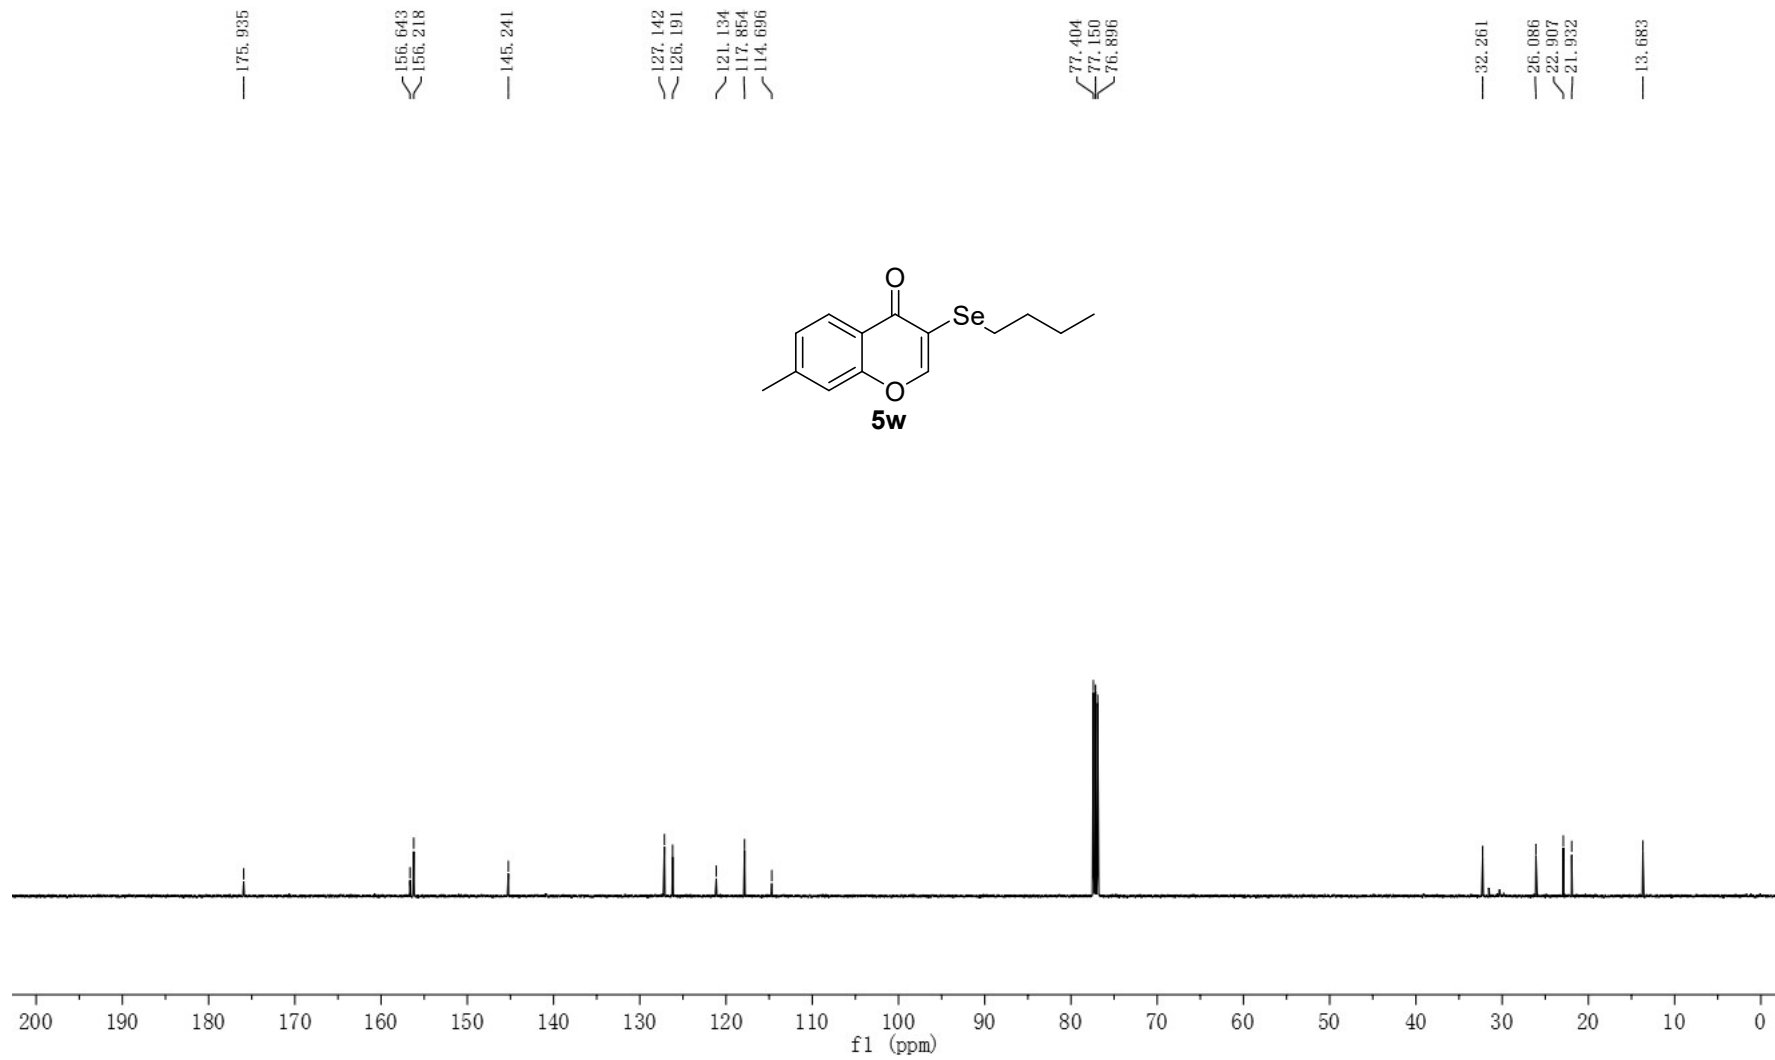

$^1\text{H}$  NMR (500 MHz,  $\text{CDCl}_3$ ) of **5x**

8.481  
8.464  
8.331  
8.189  
8.171  
7.943  
7.928  
7.797  
7.780  
7.735  
7.719  
7.706  
7.703  
7.697  
7.694  
7.680  
7.667

2.961  
2.946  
2.931

1.722  
1.707  
1.692  
1.677  
1.662  
1.480  
1.465  
1.450  
1.435  
1.420  
1.406  
0.932  
0.917  
0.902

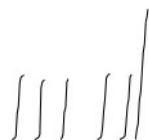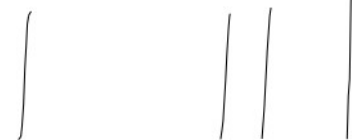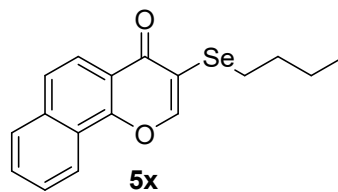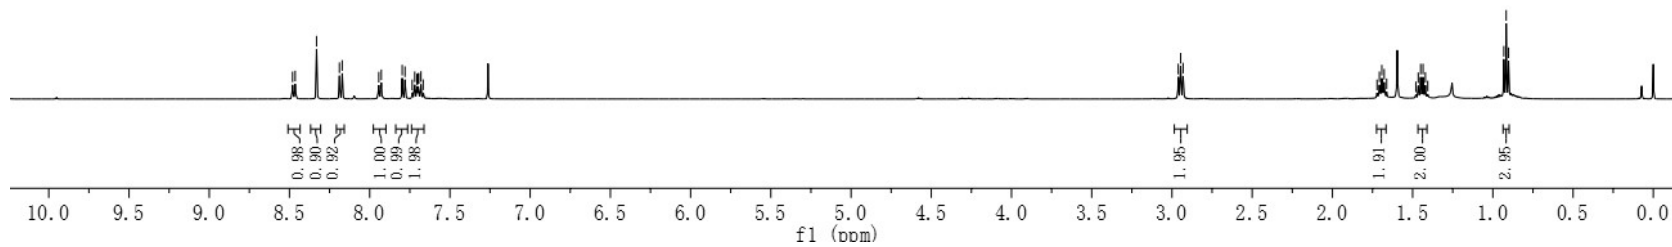

$^{13}\text{C}$  NMR (126 MHz,  $\text{CDCl}_3$ ) of **5x**

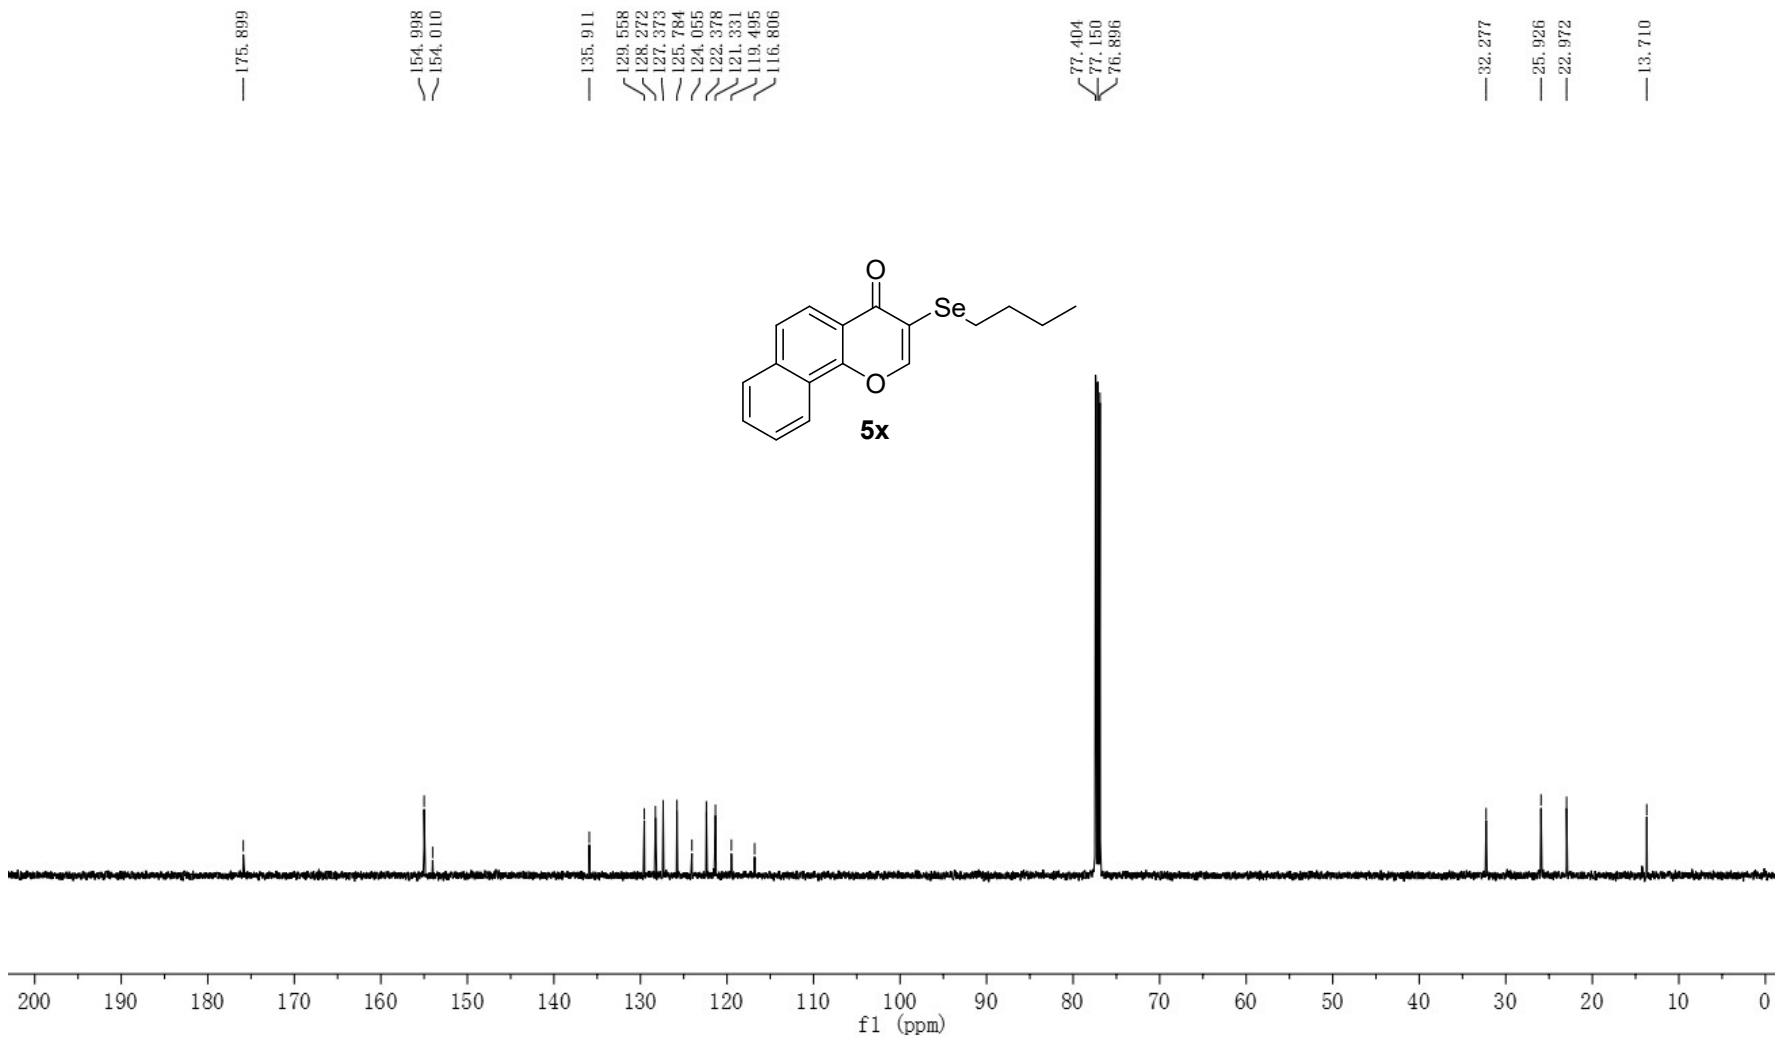

Supplement: d4cc04609a1.pdf [file d4cc04609a1.pdf]
